# Supplementary material for: Institutions and the uneven geography of the first wave of the COVID‐19 pandemic
Source: PubMed Central journal article supplement (PMC8242880; doi:10.1111/jors.12541), 2021-06-07

# Appendix A

Figure A1. Evolution of excess mortality during the first wave of the COVID-19 pandemic by Country.

## AUSTRIA

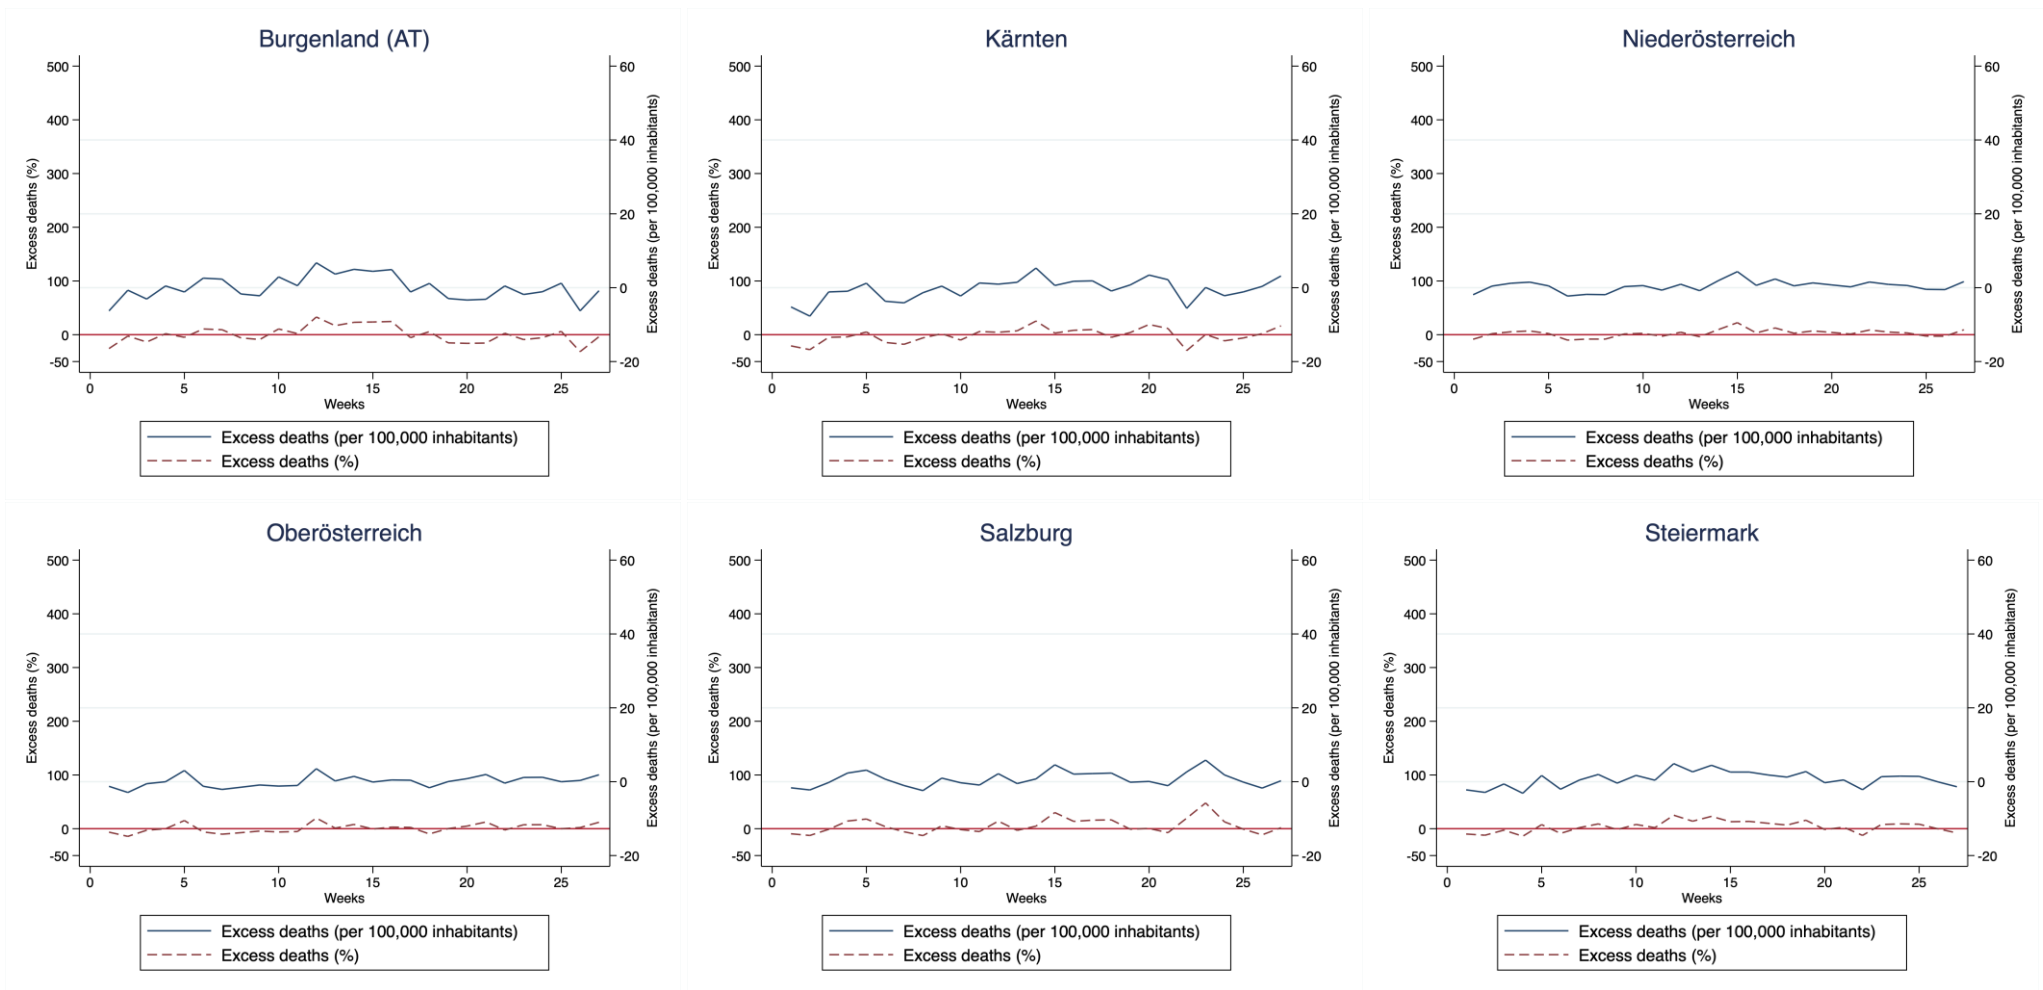

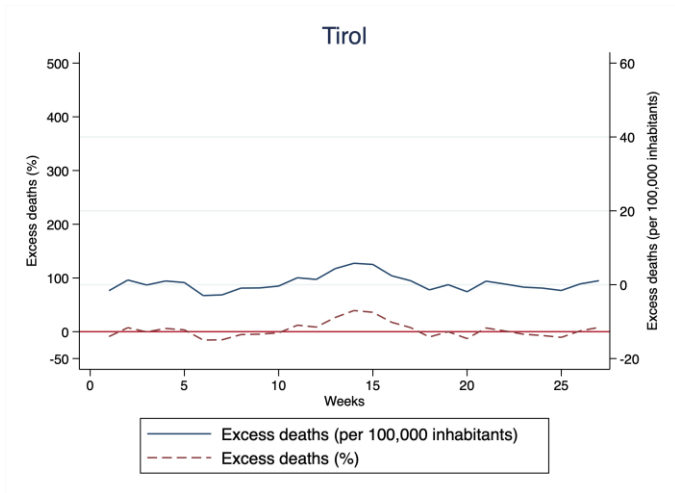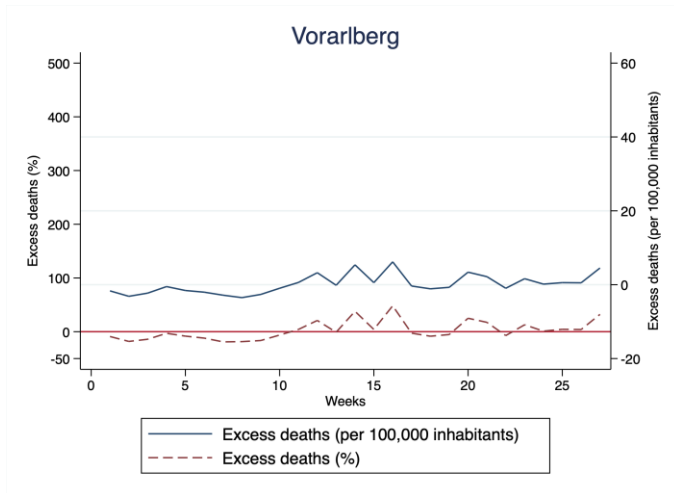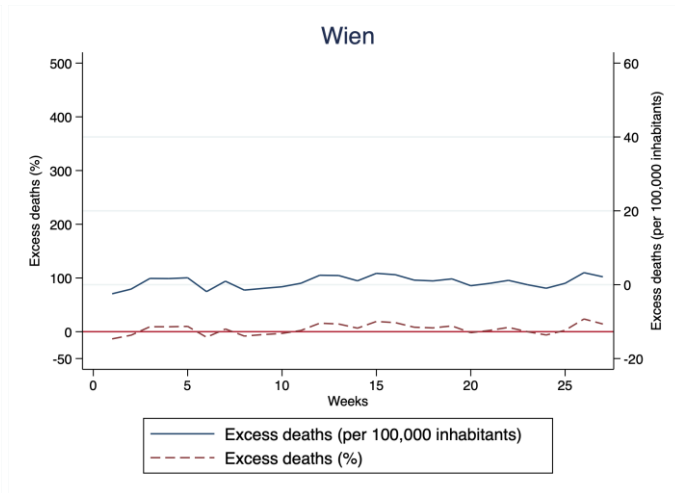

## BELGIUM

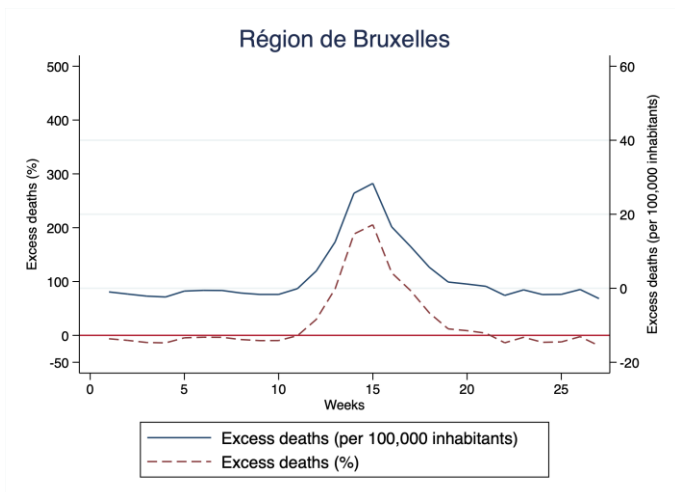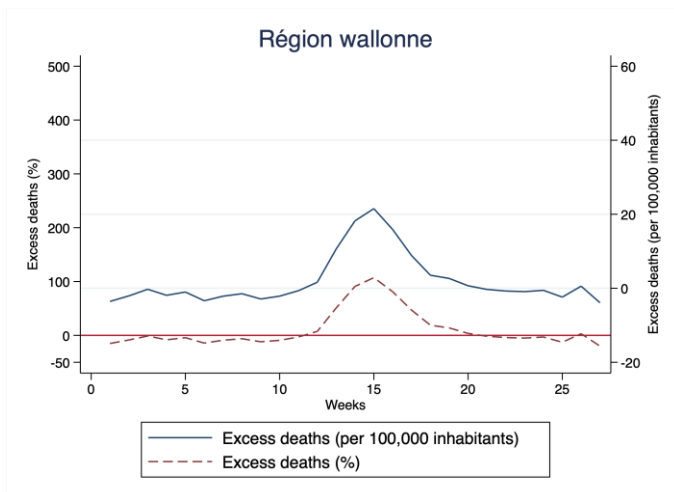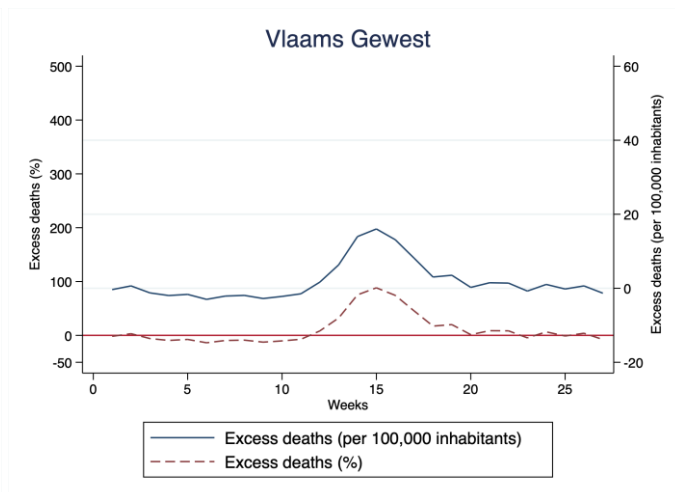

# BULGARIA

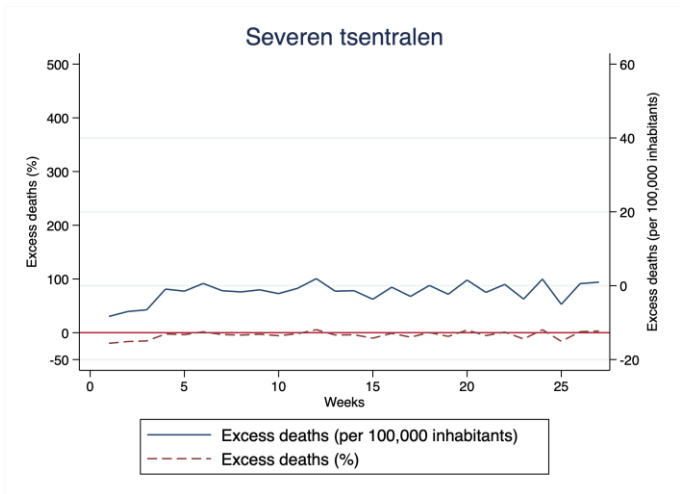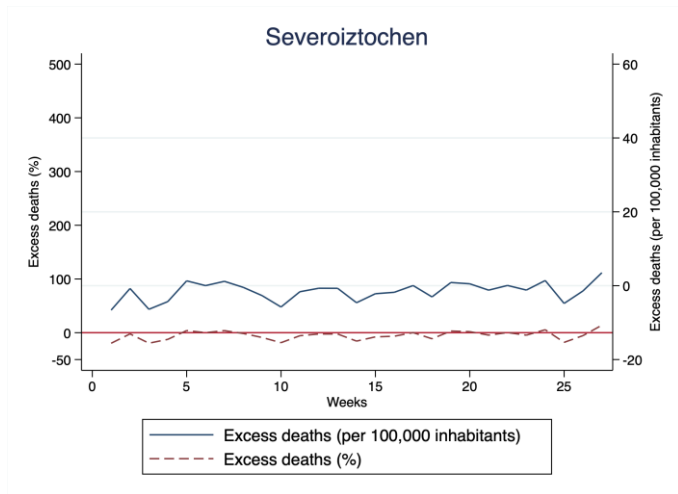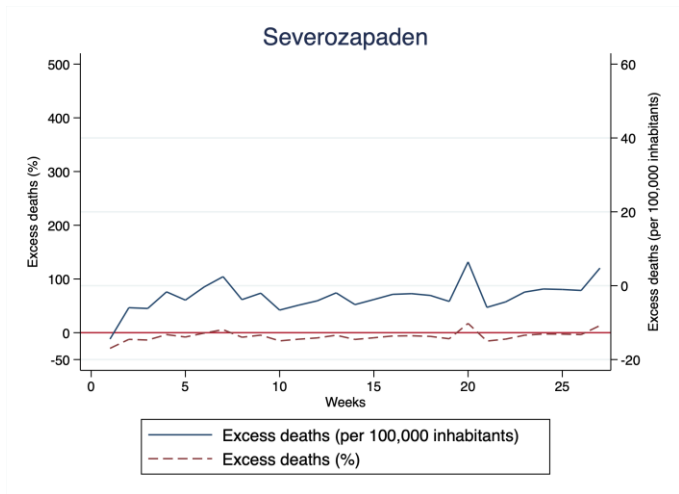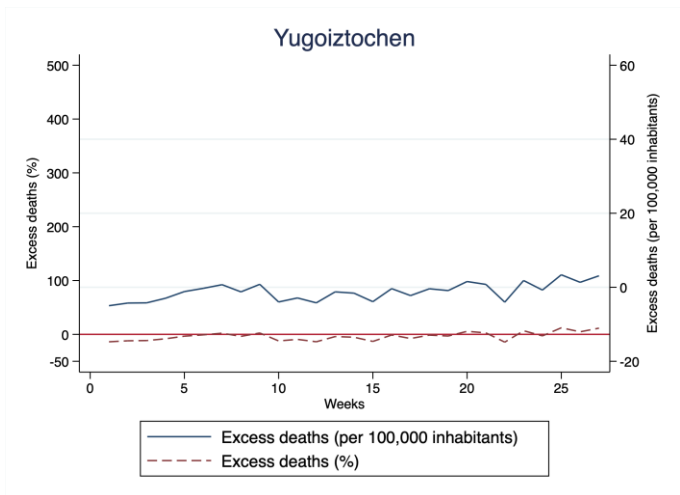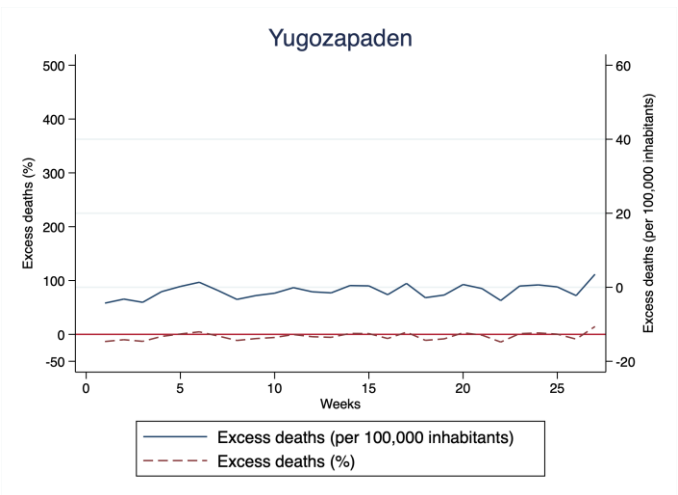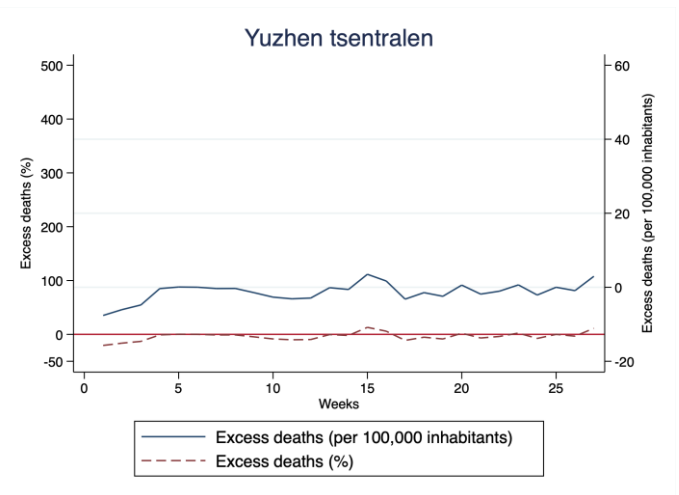

# CZECHIA

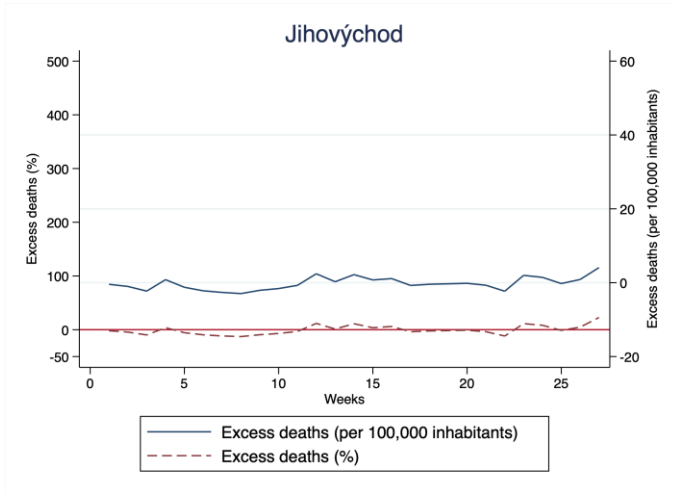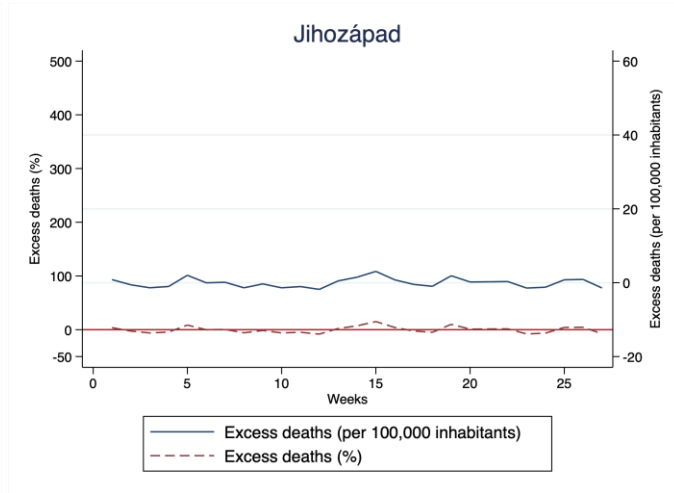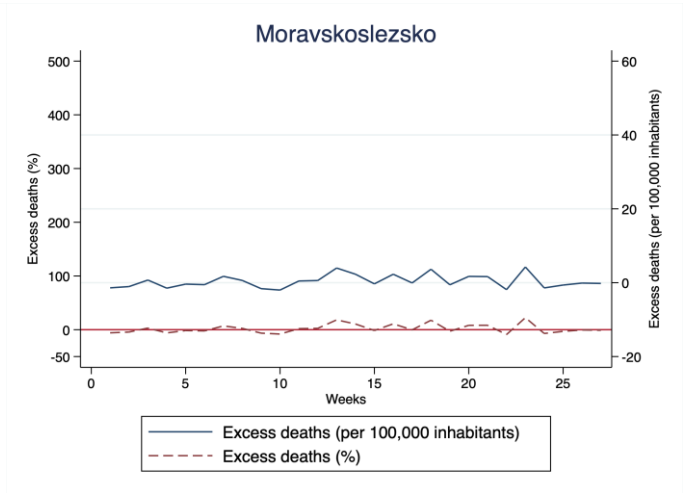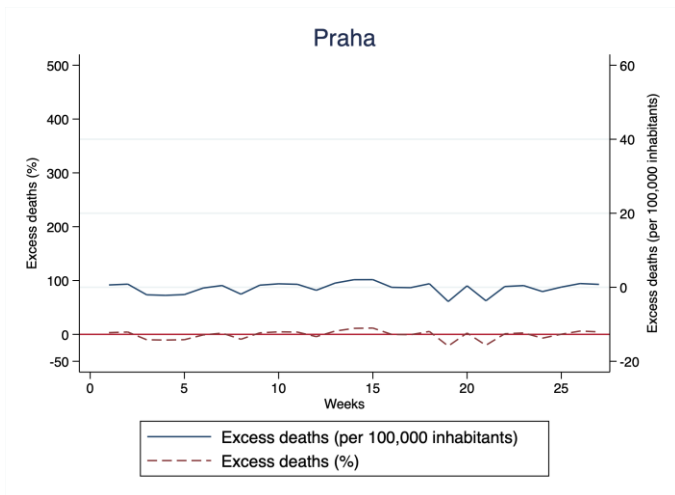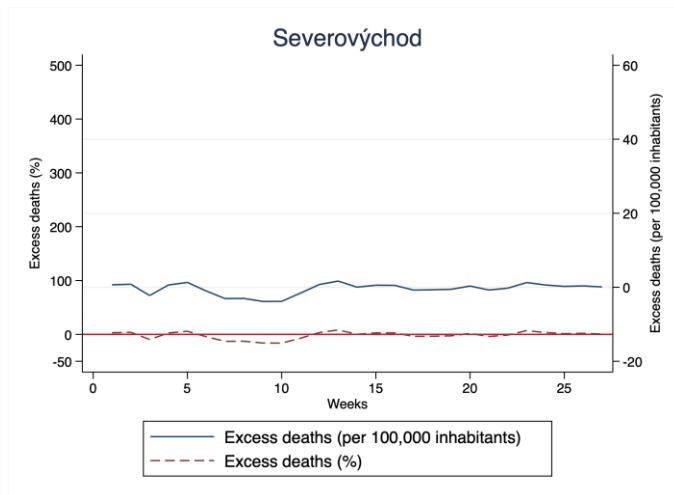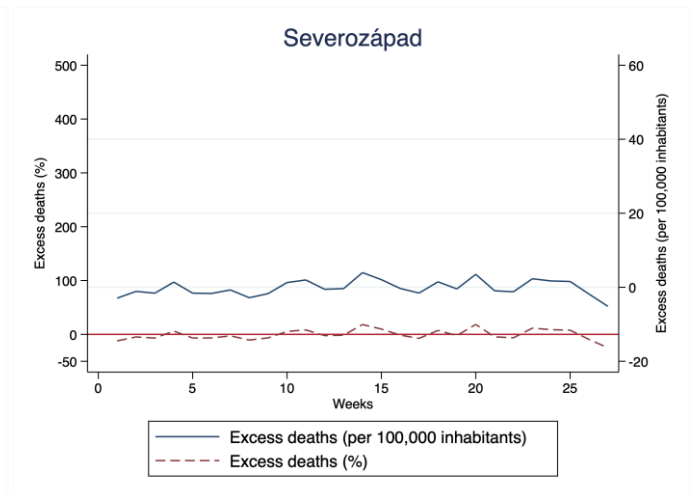



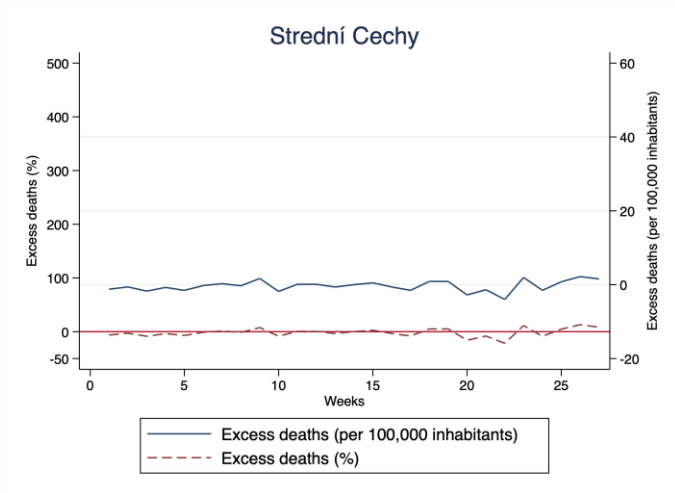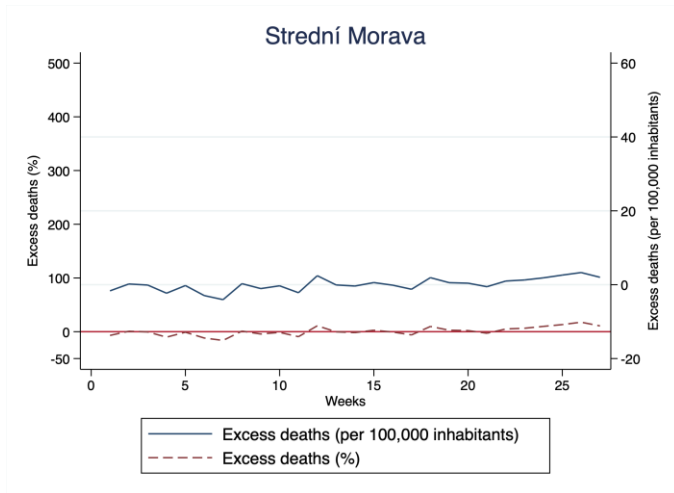

## GERMANY

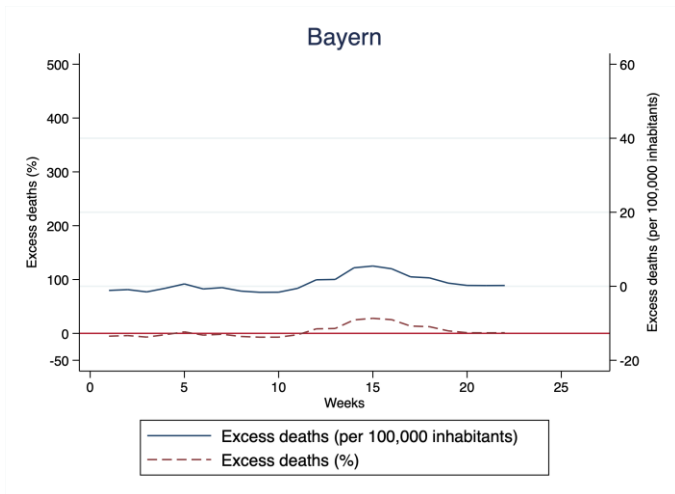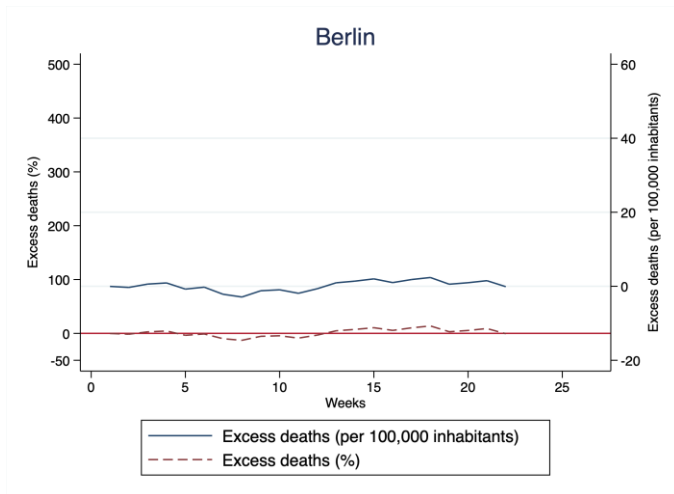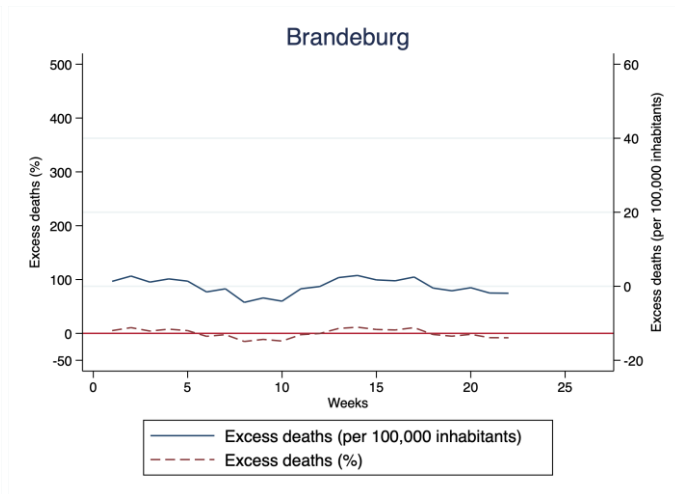

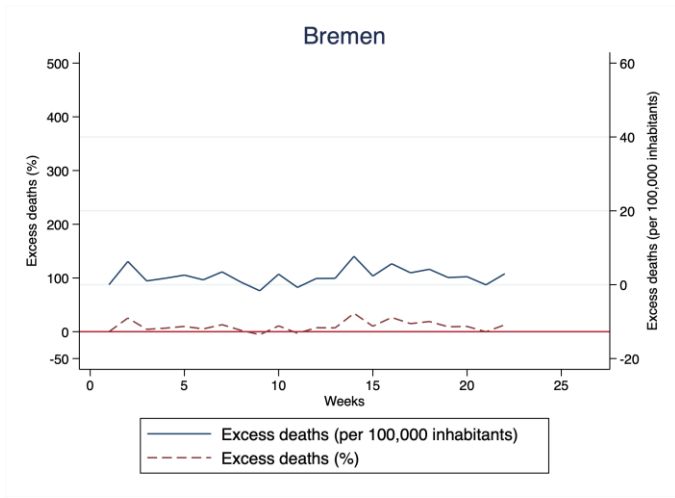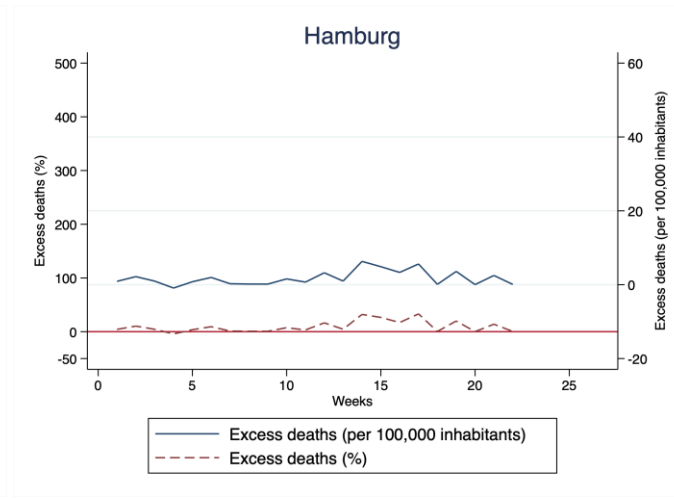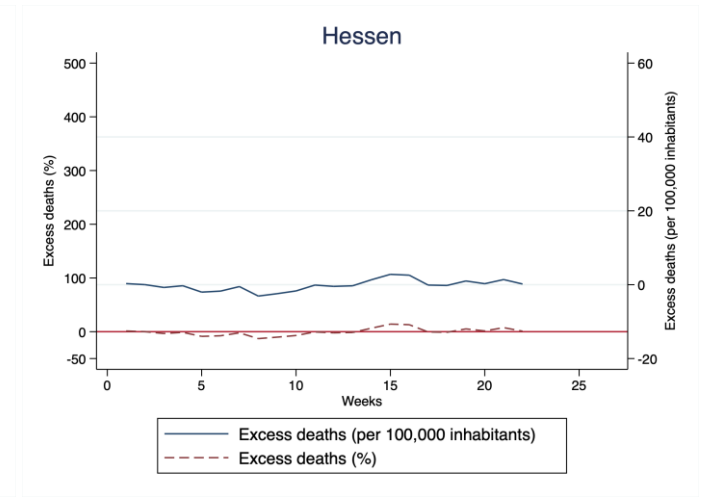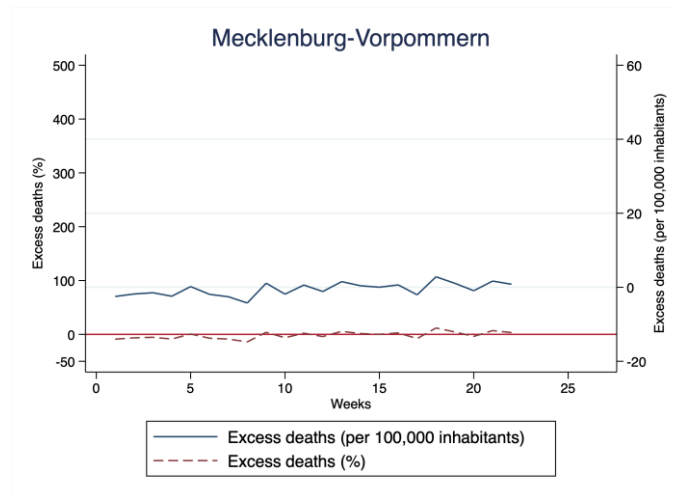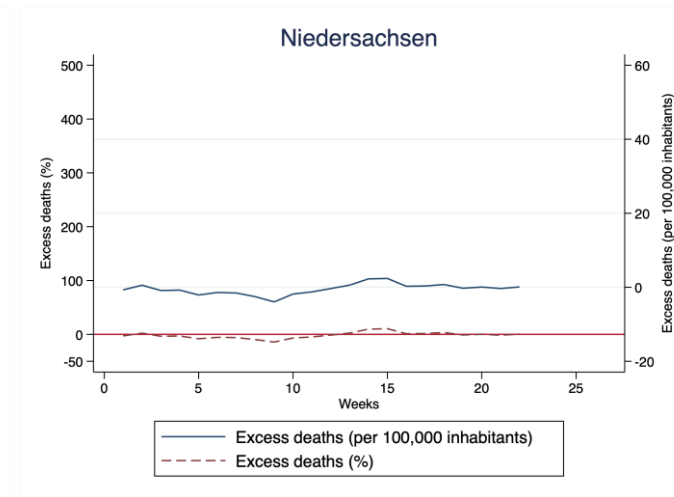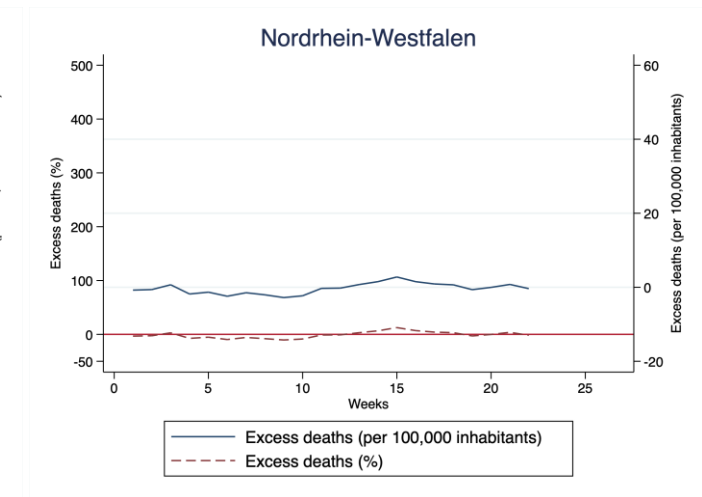

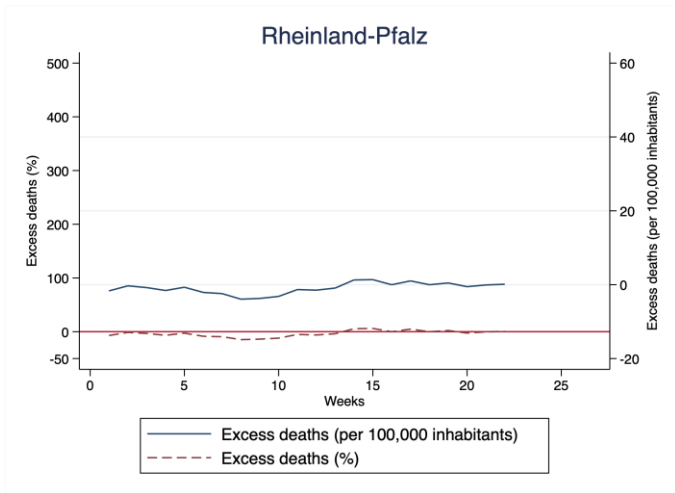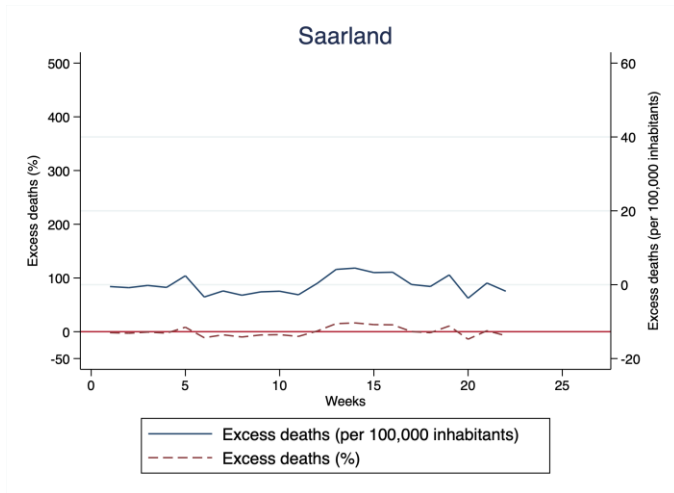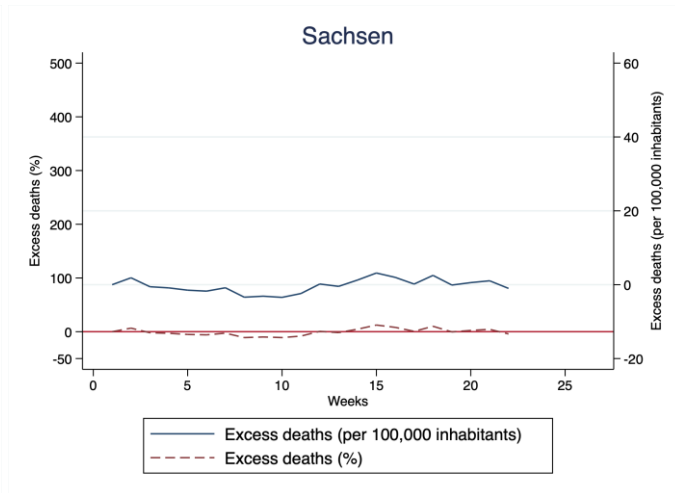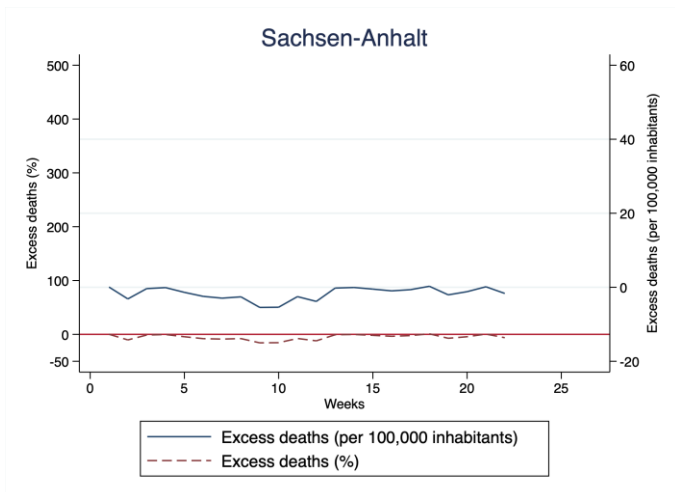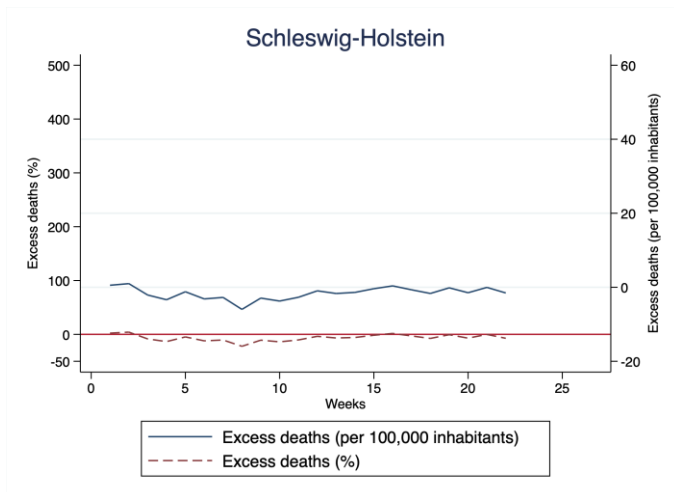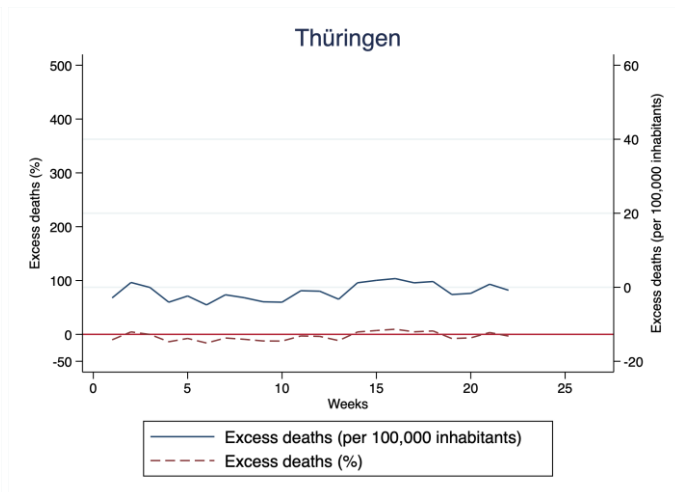

# DENMARK

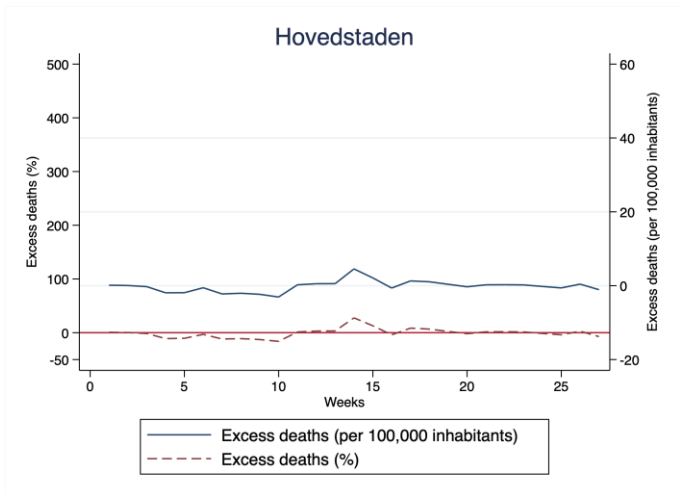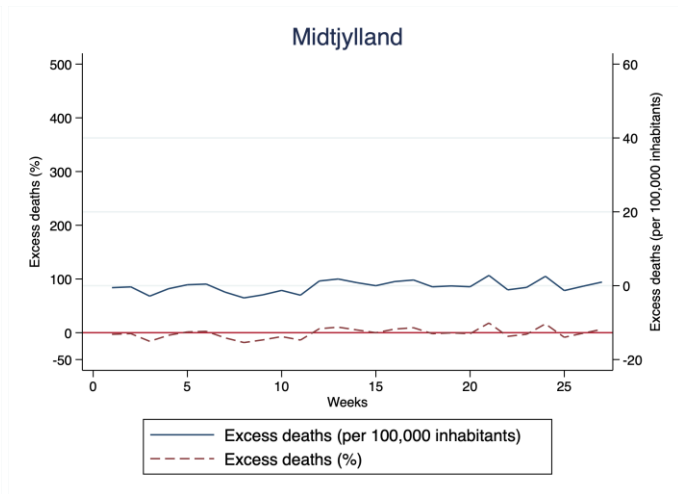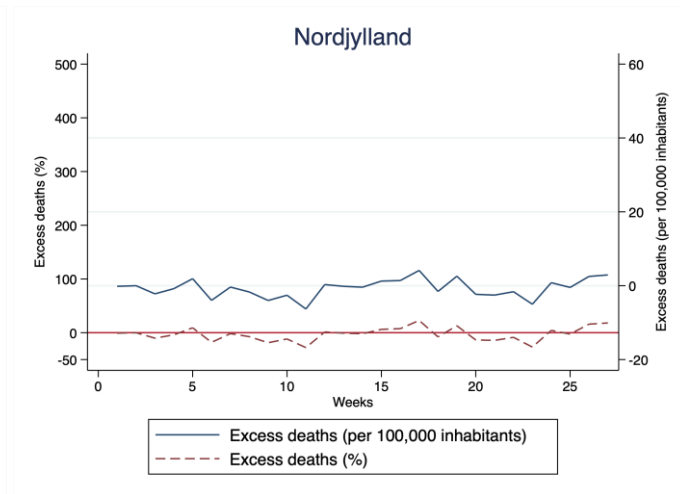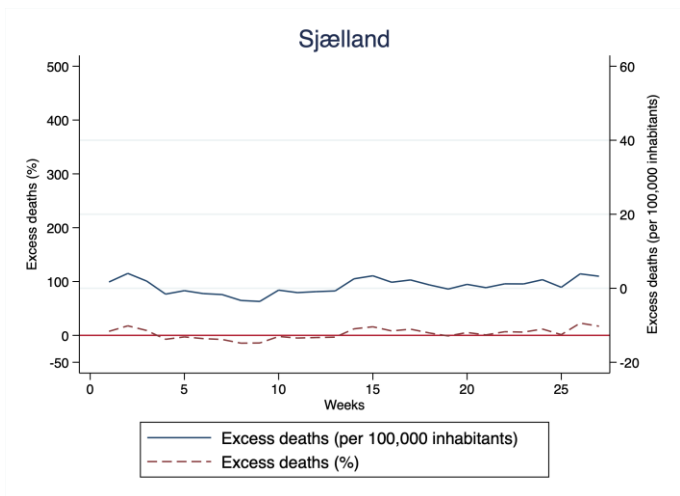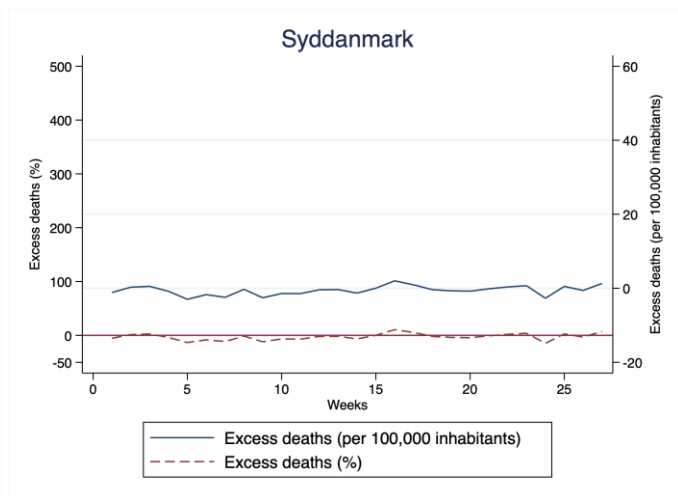

## ESTONIA

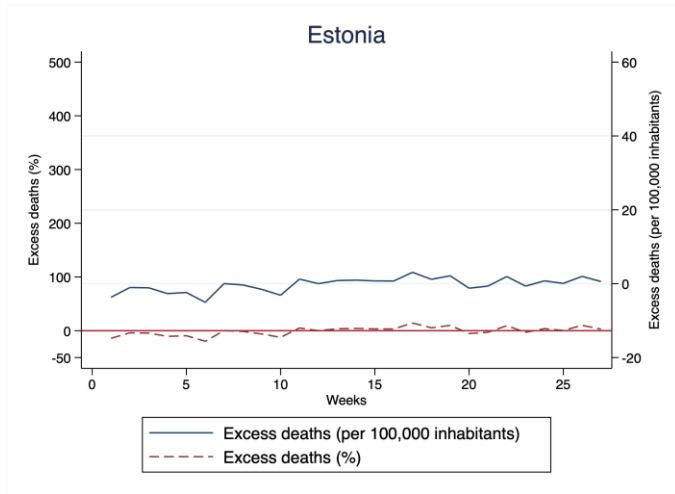

## FINLAND

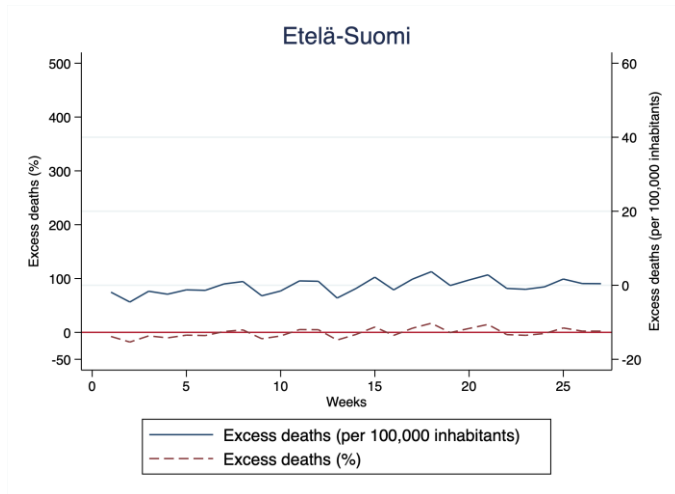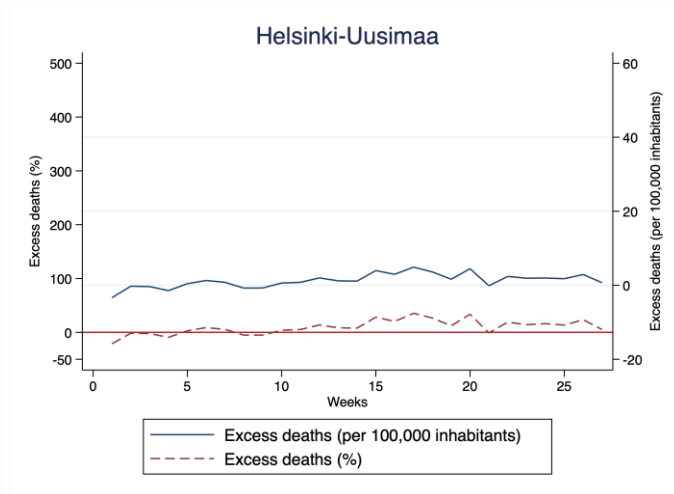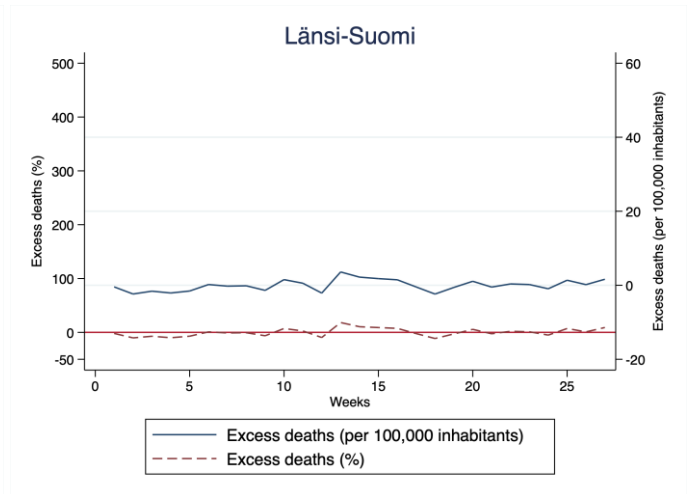

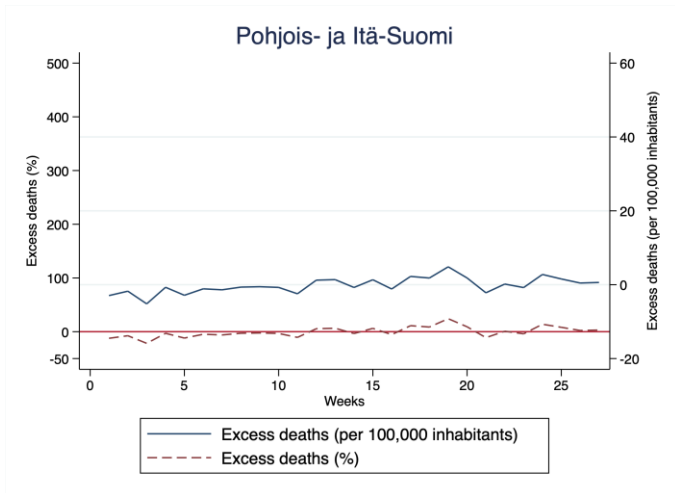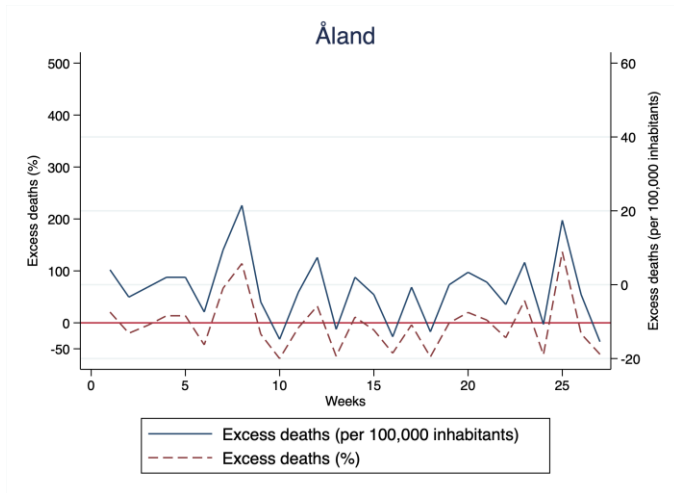

## FRANCE

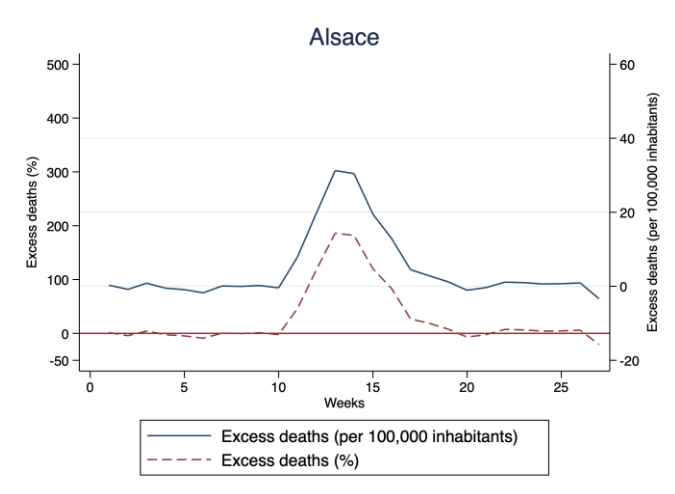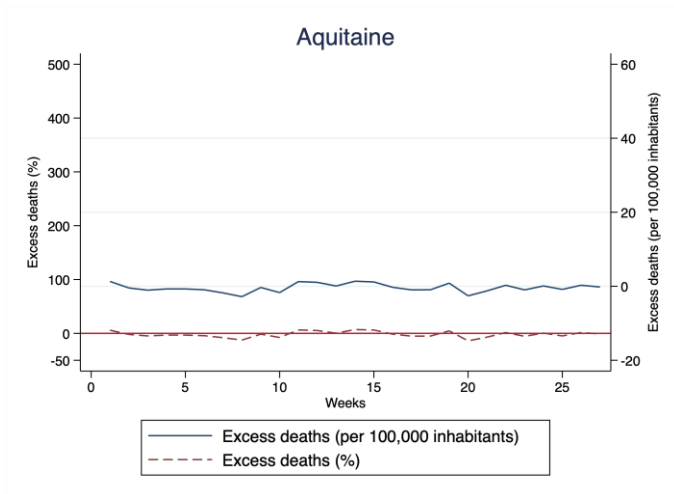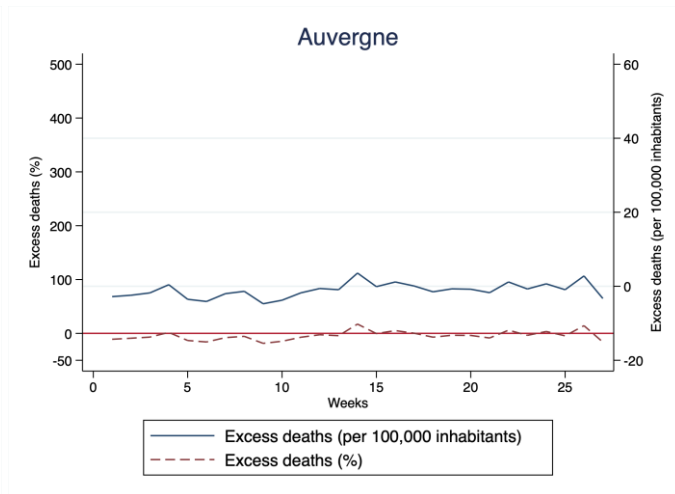

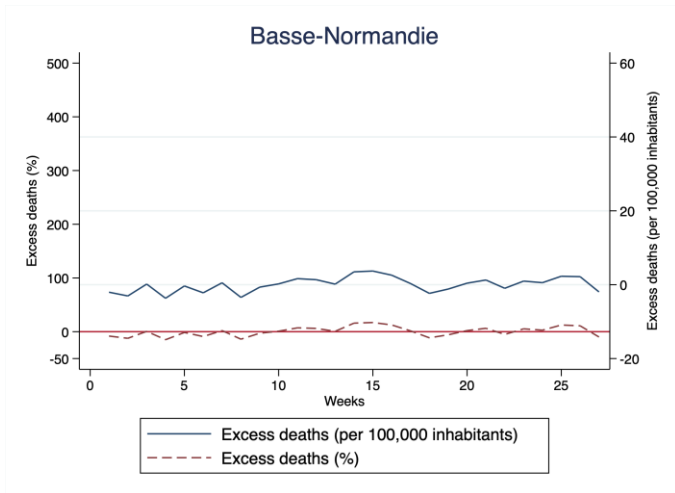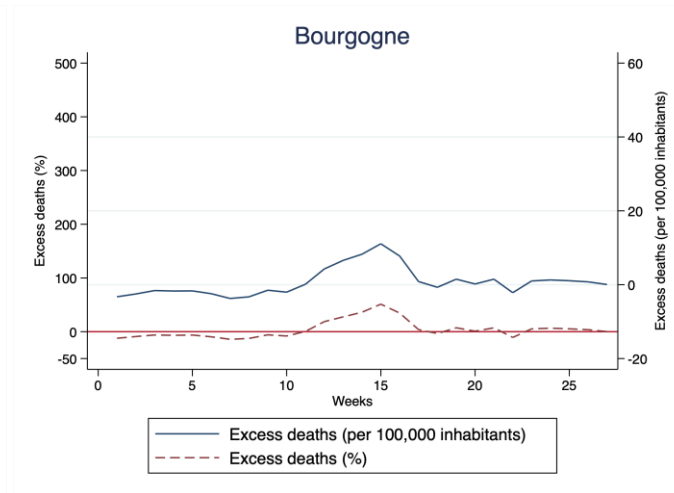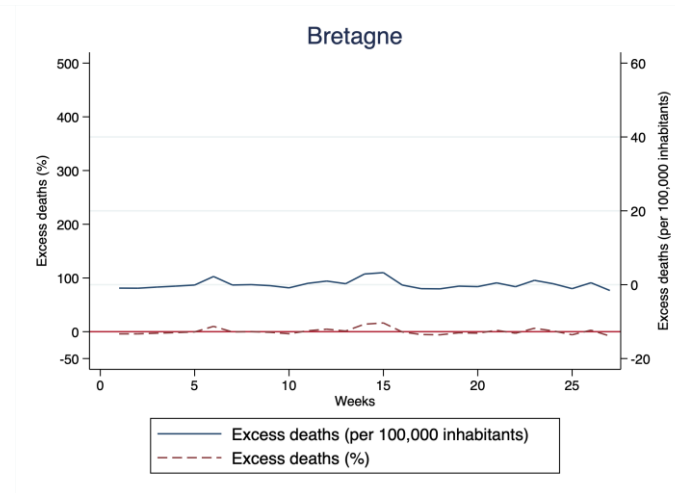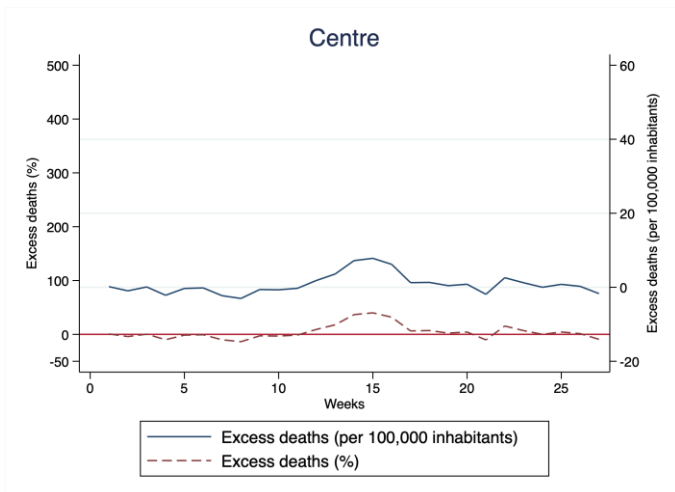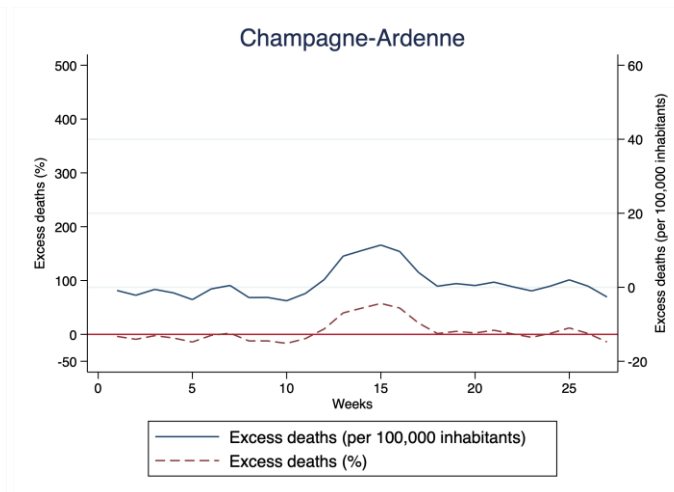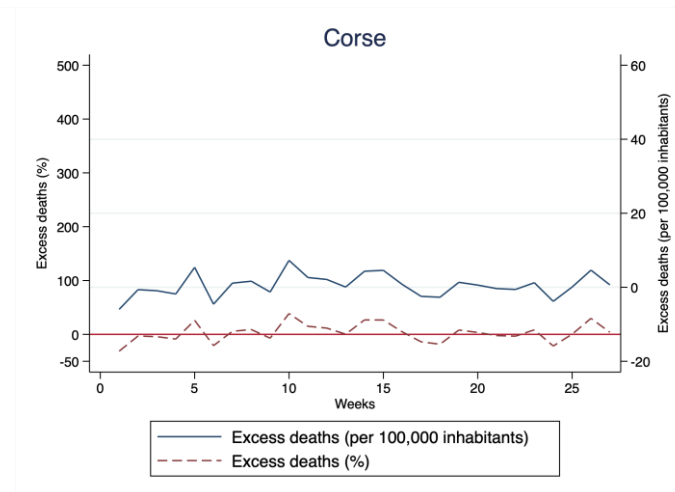

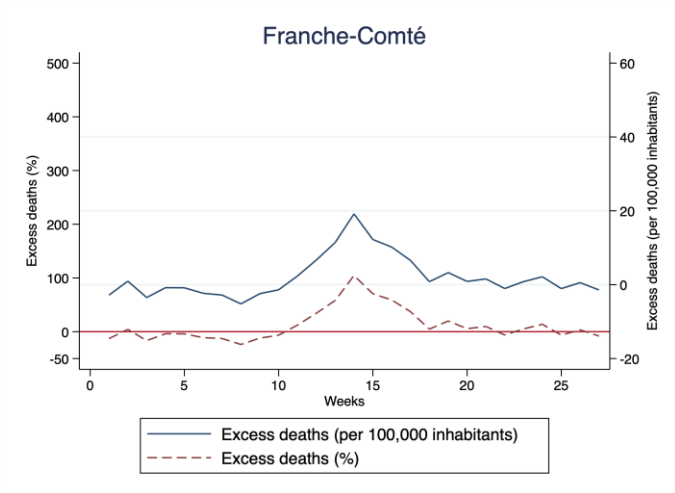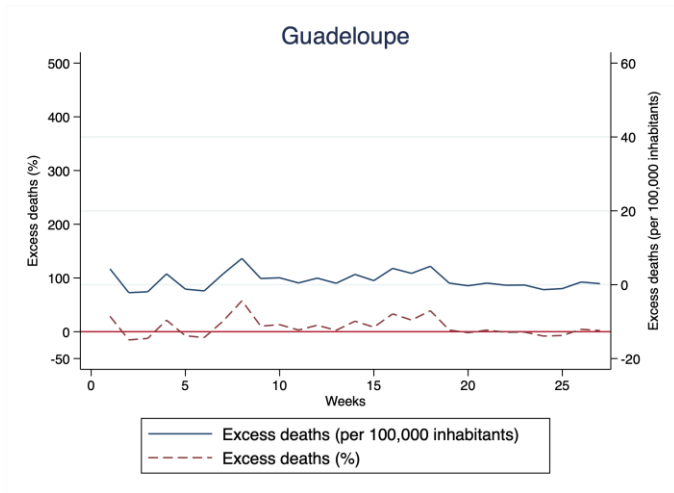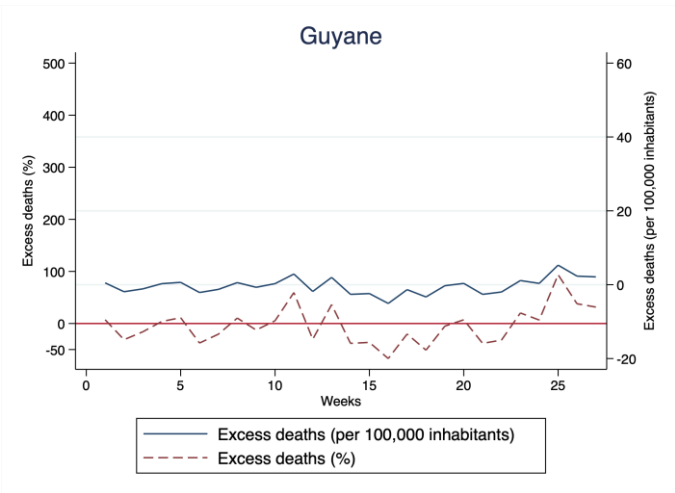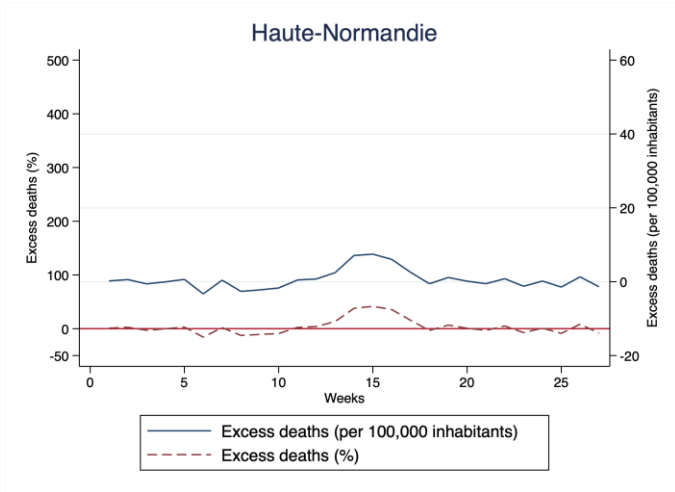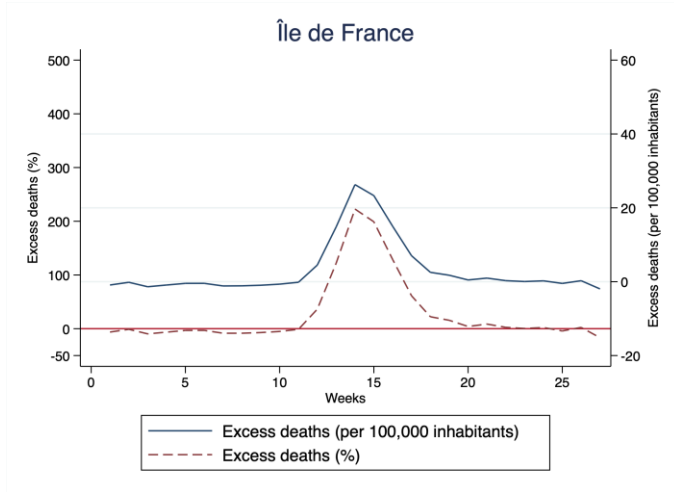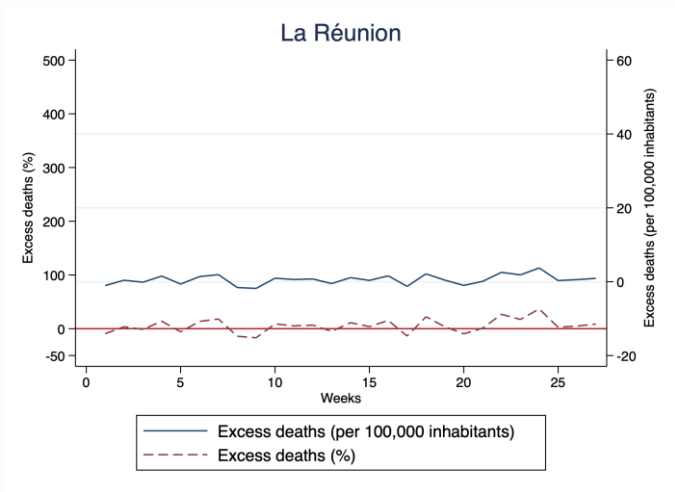



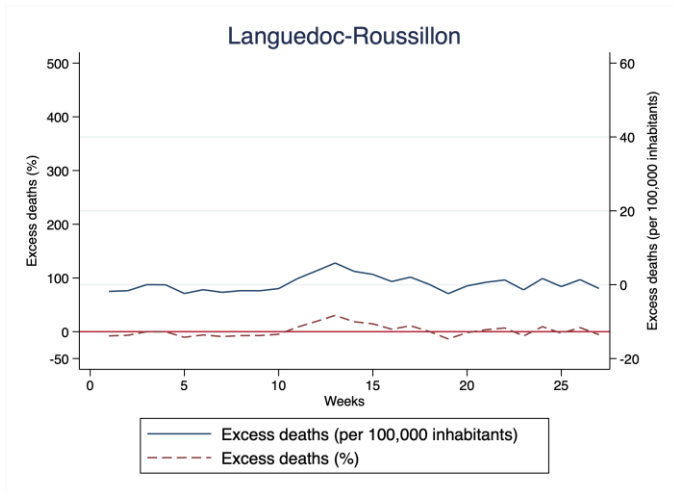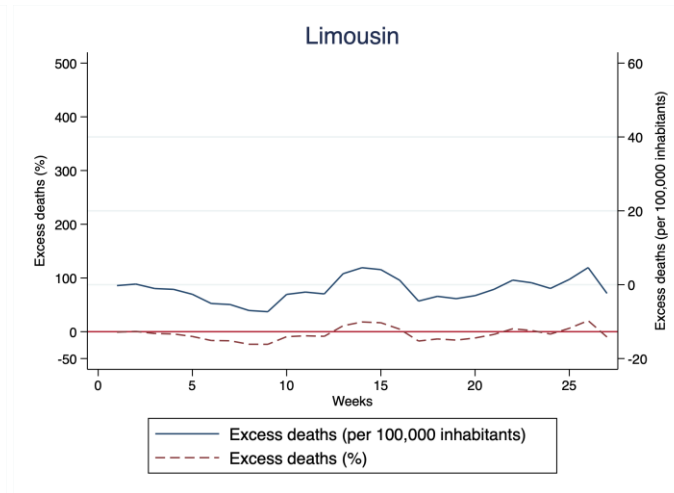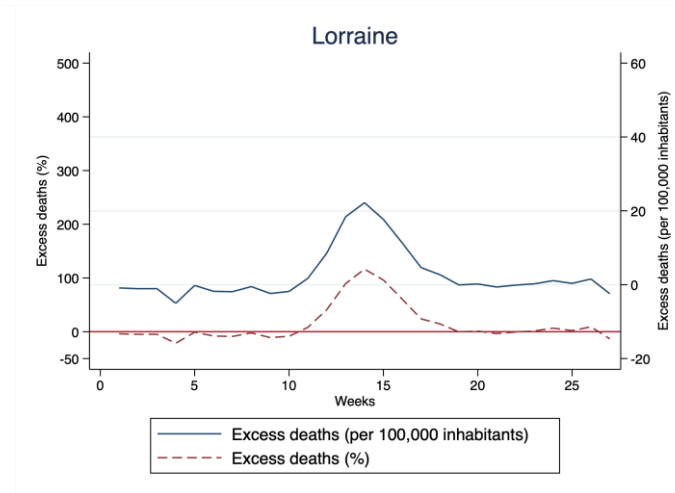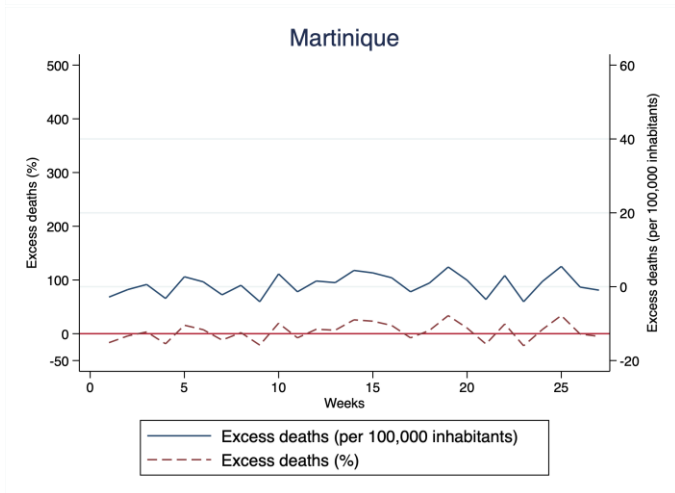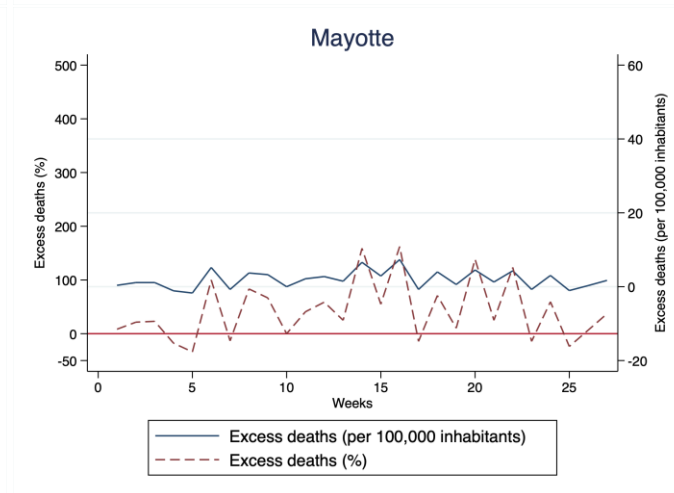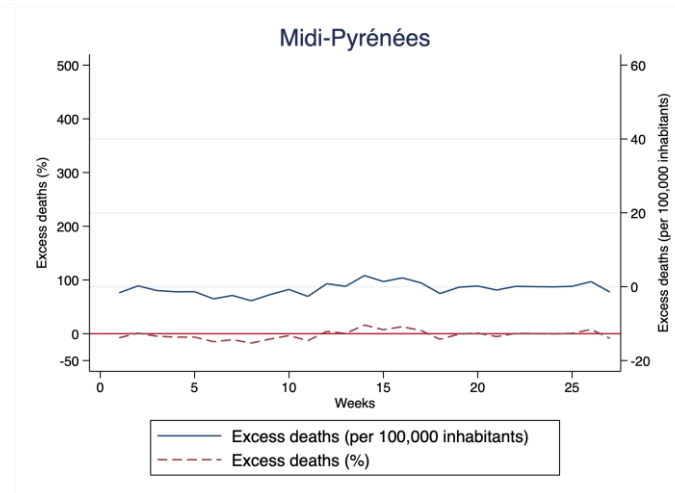

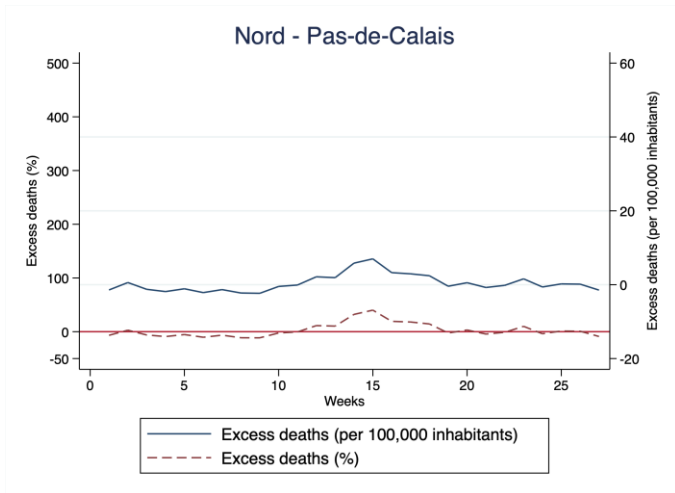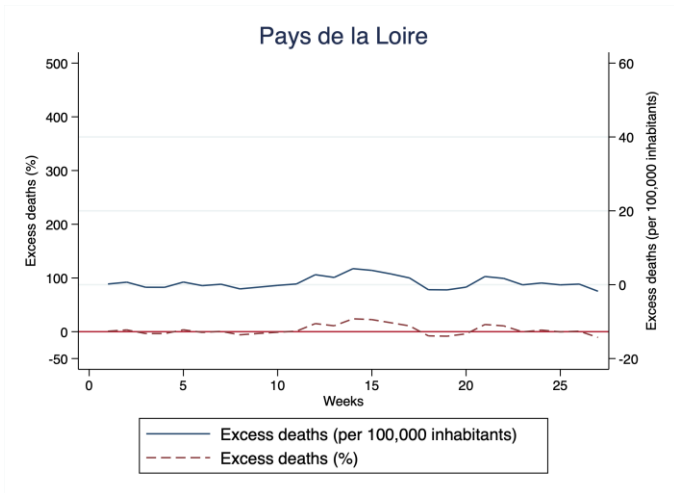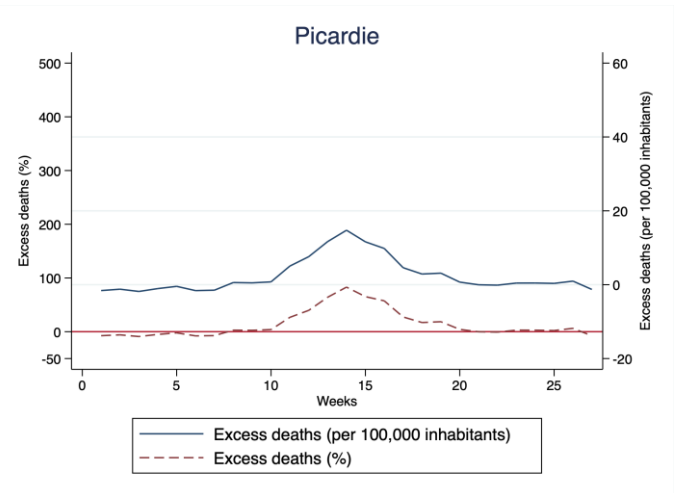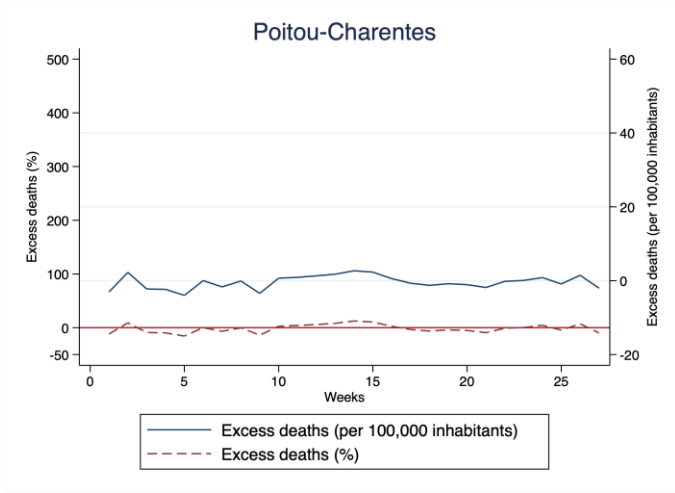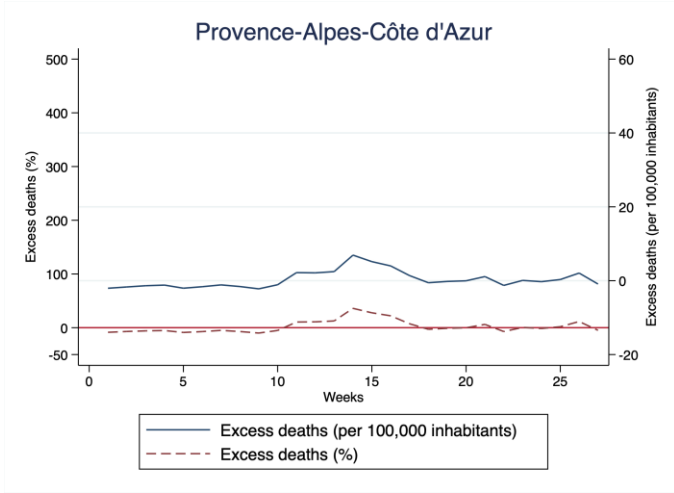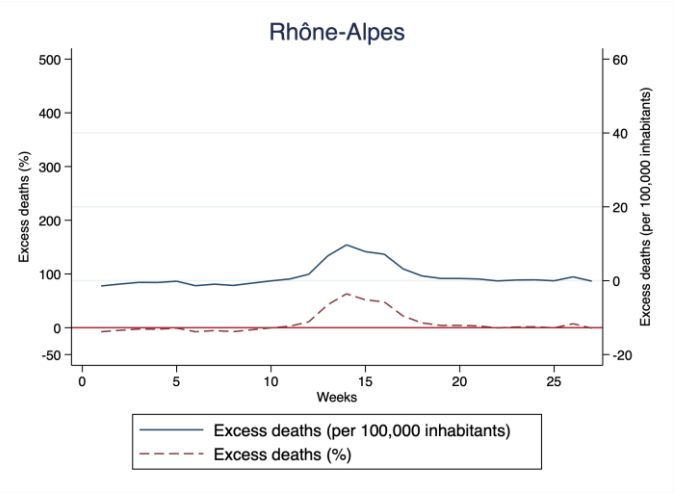

# HUNGARY

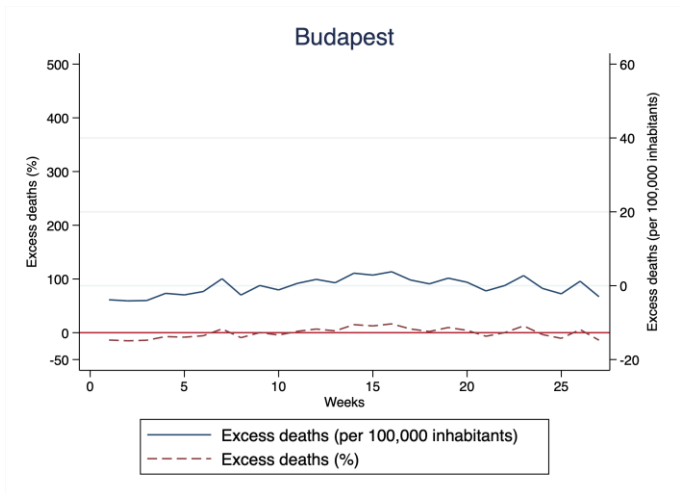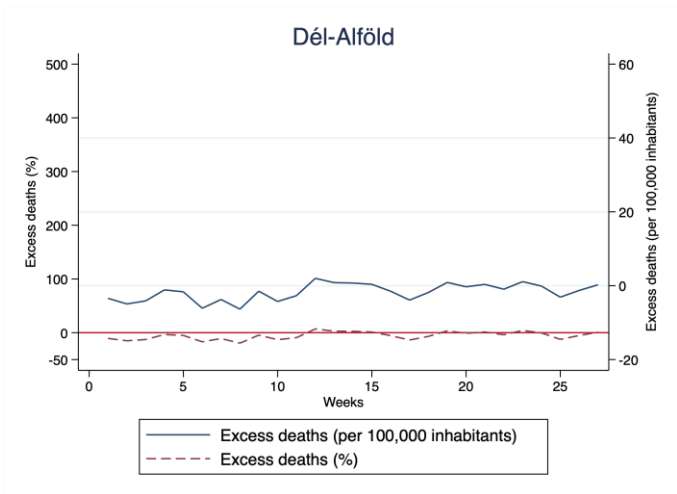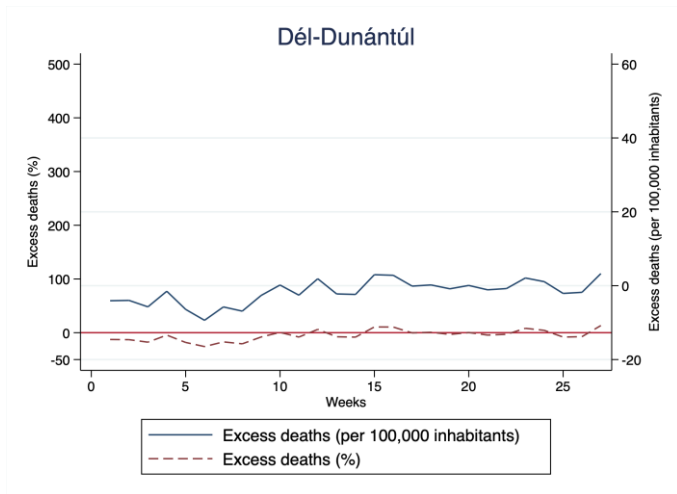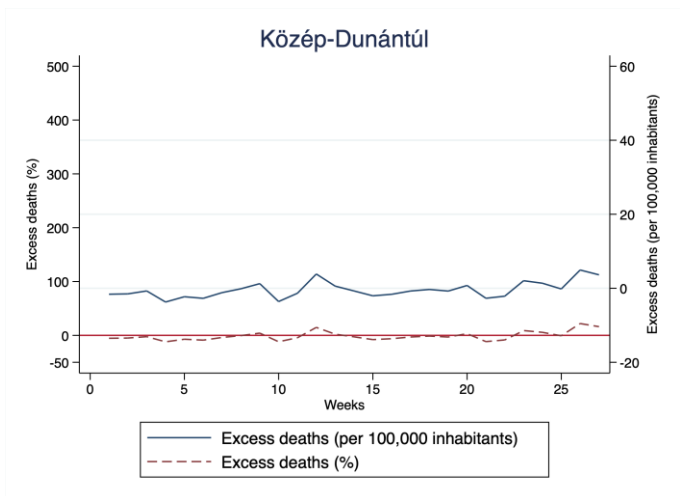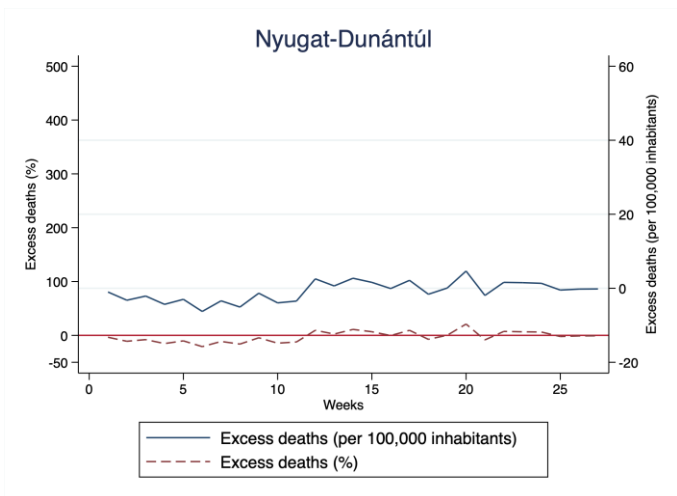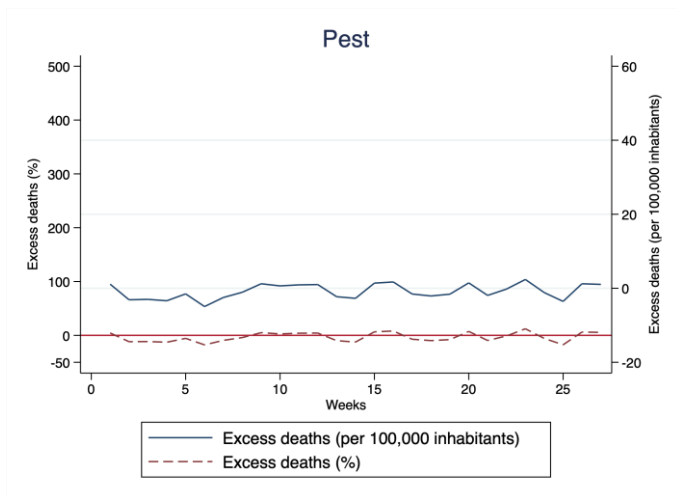

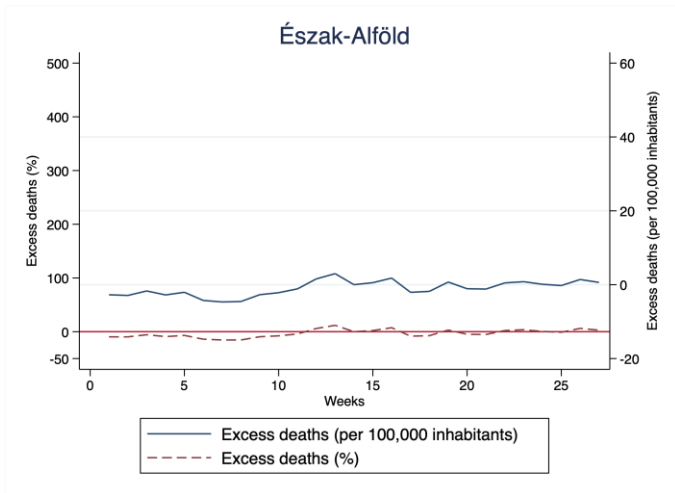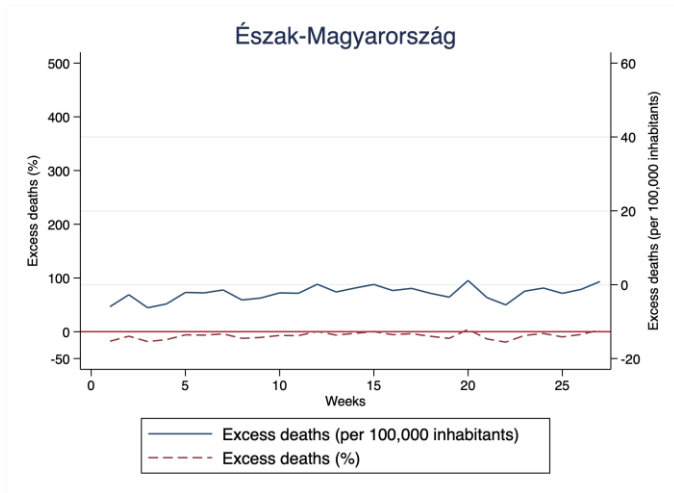

## ITALY

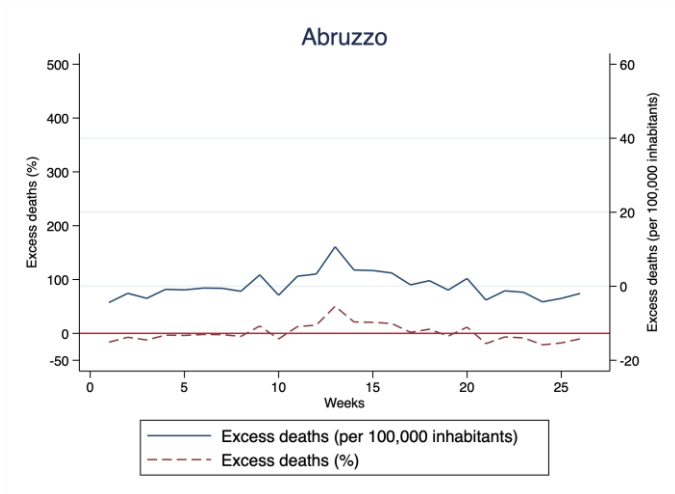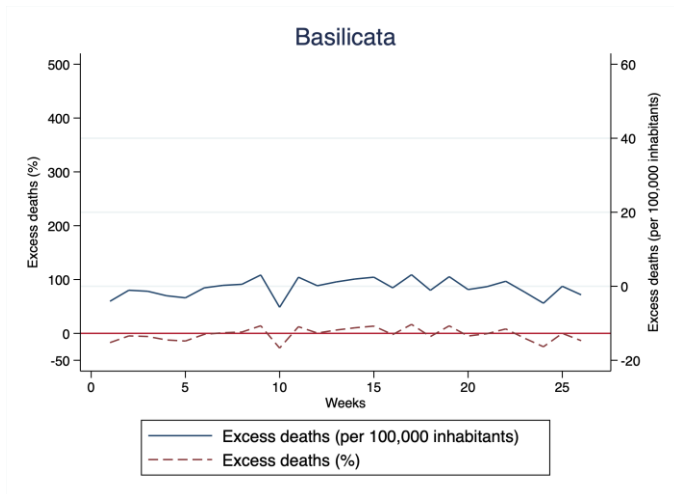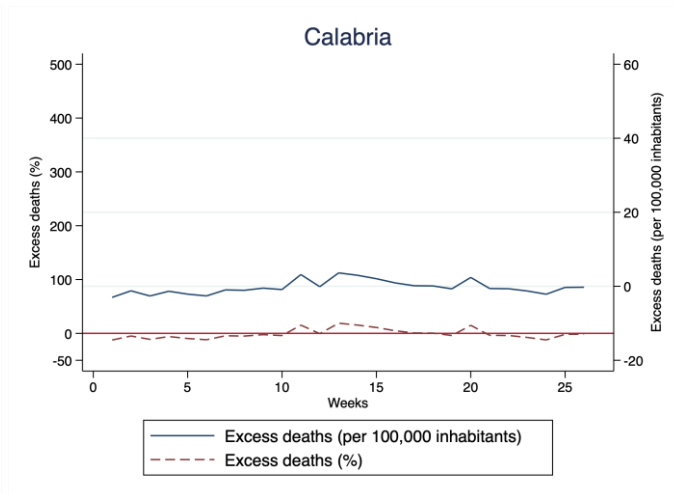

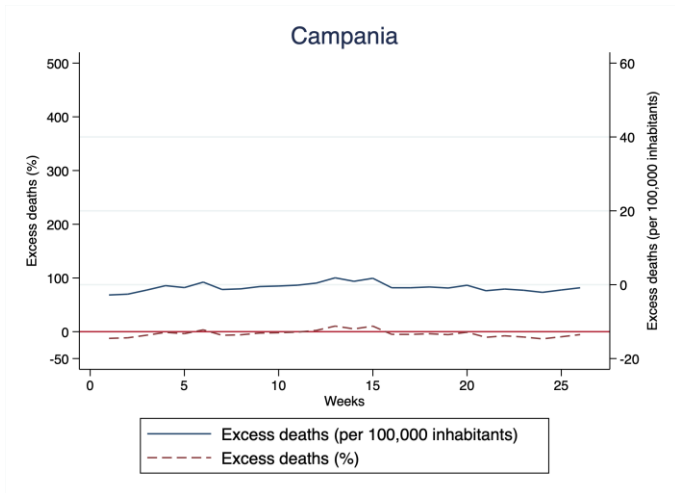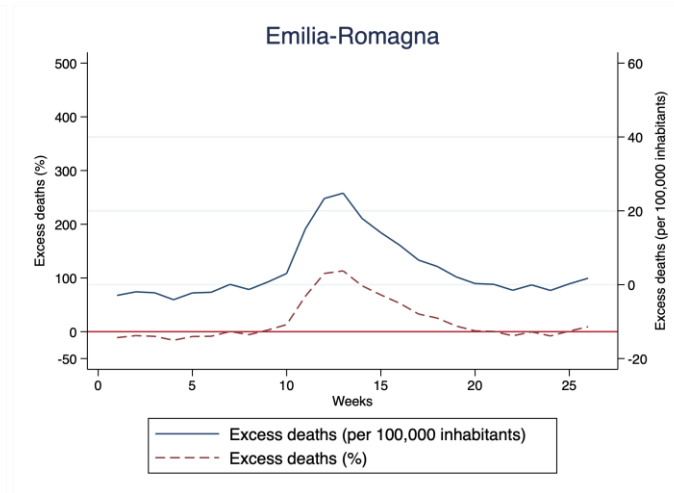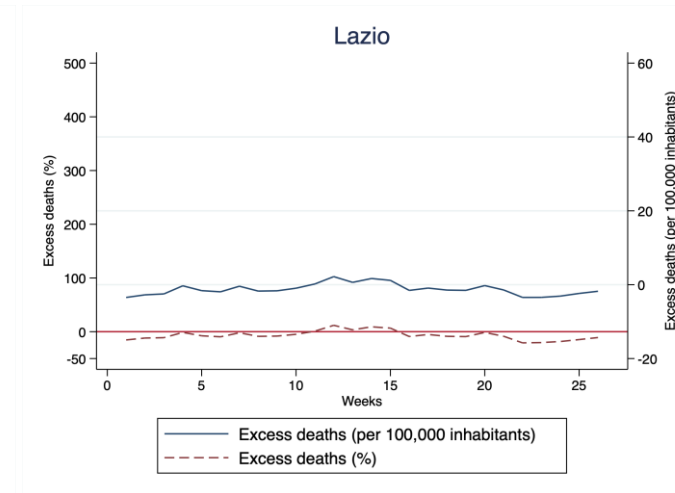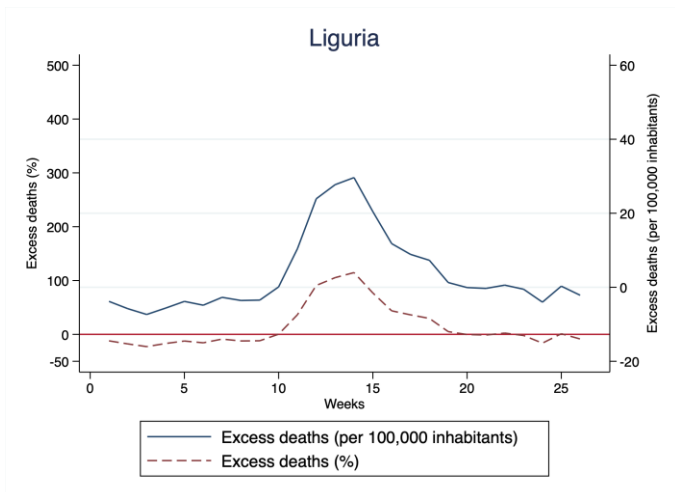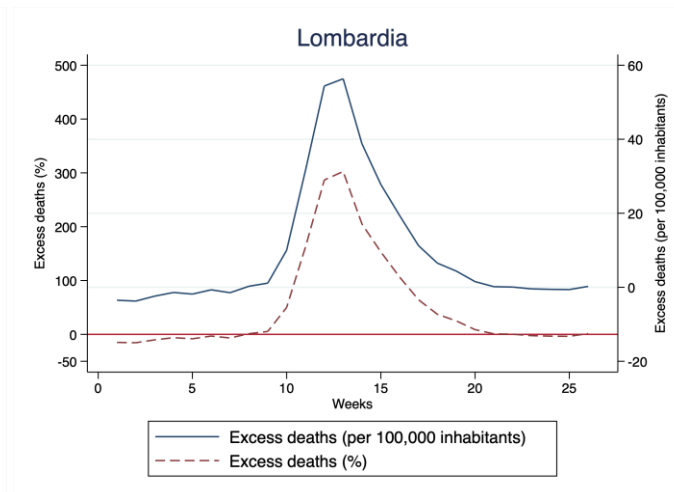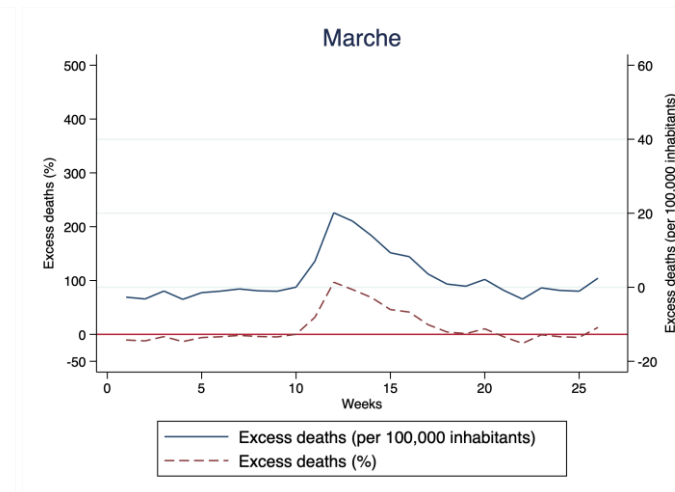

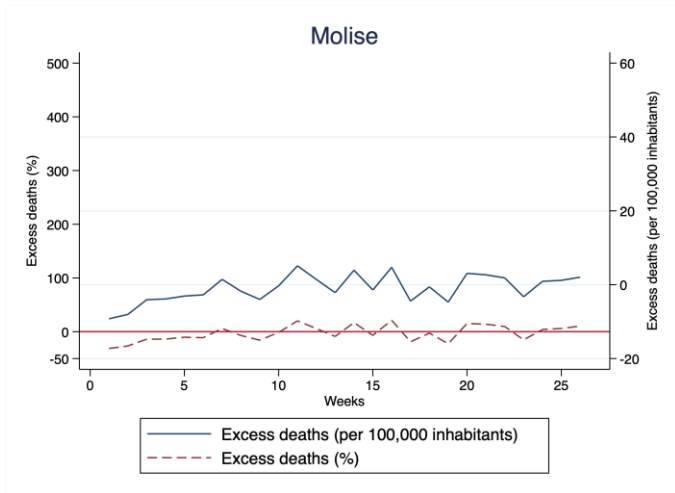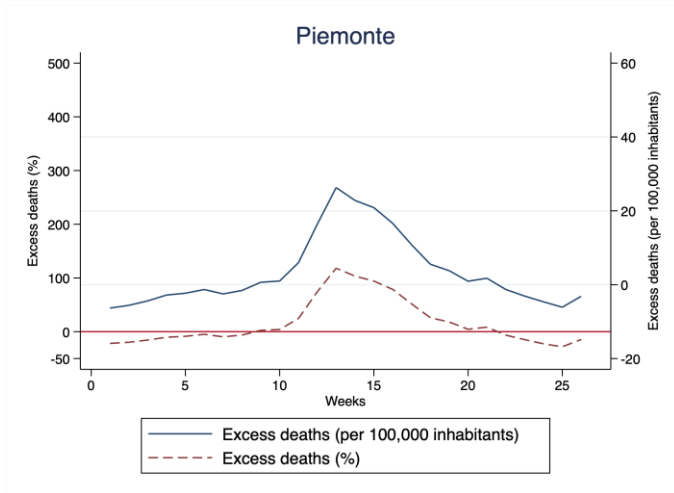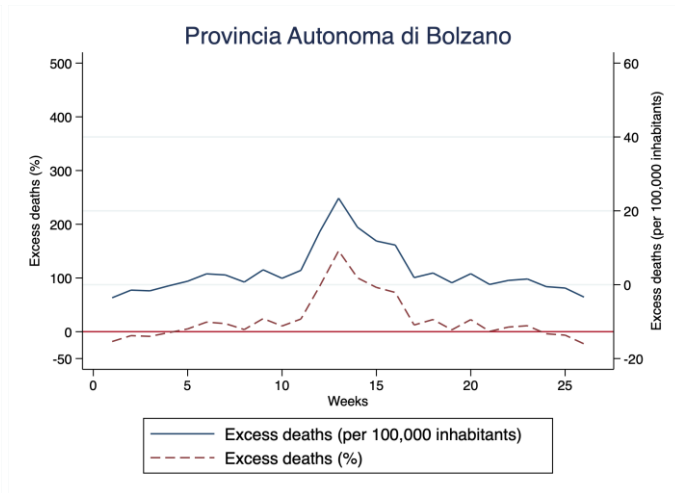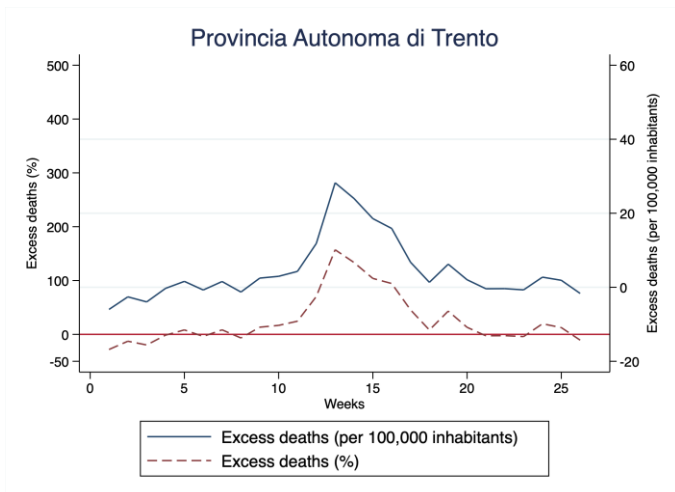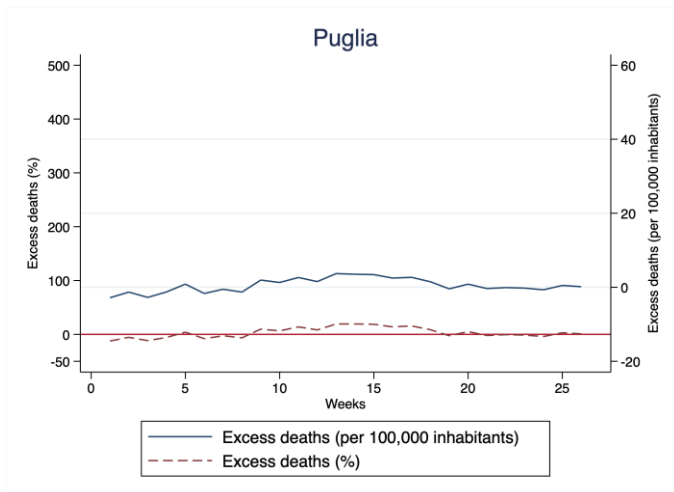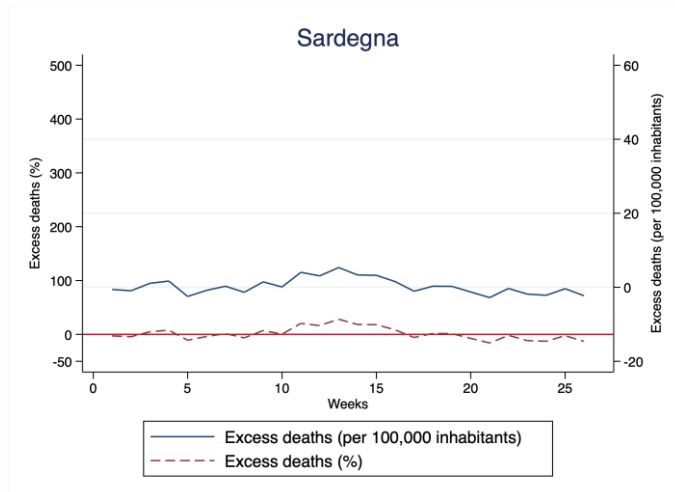

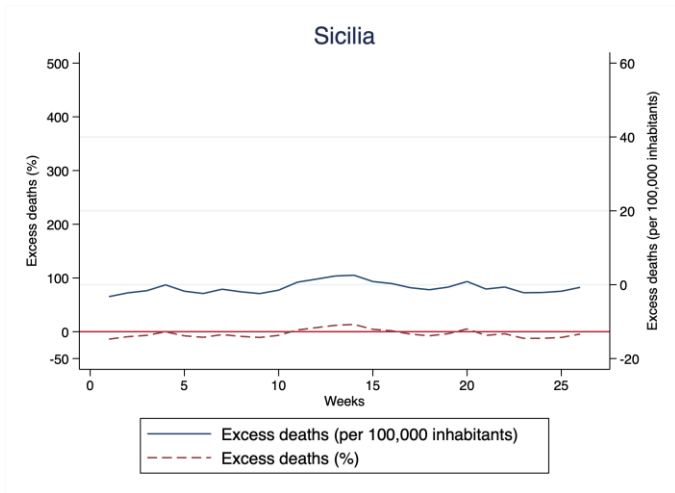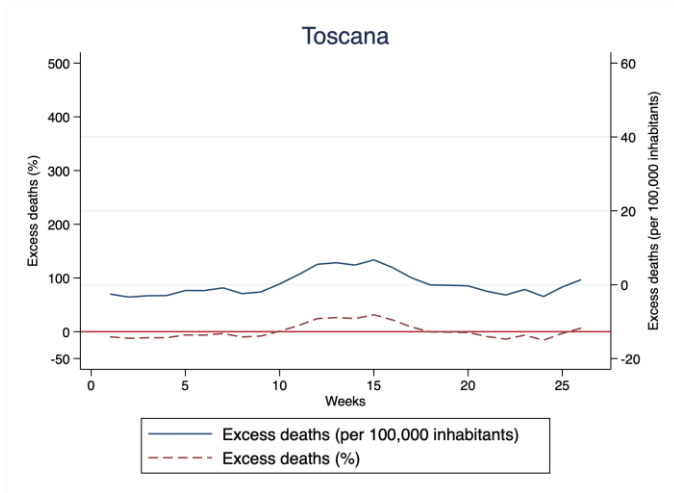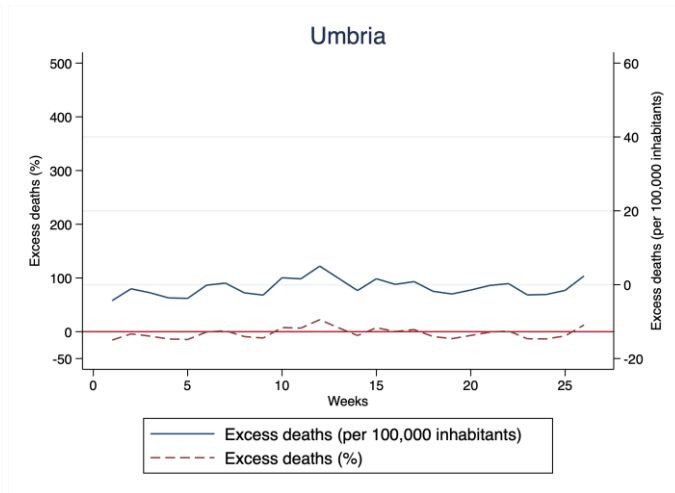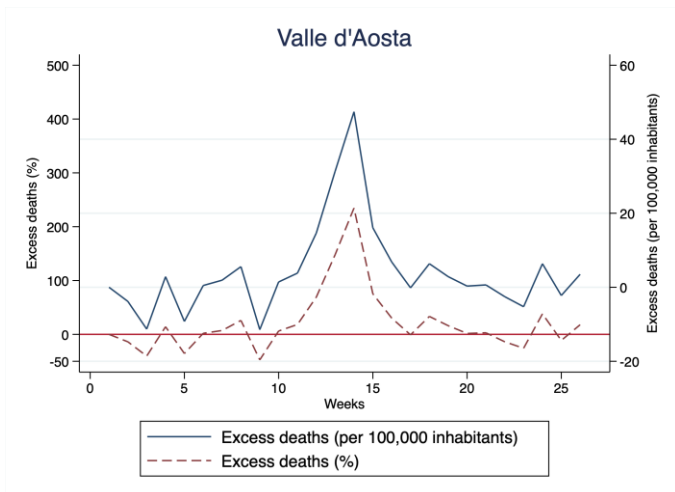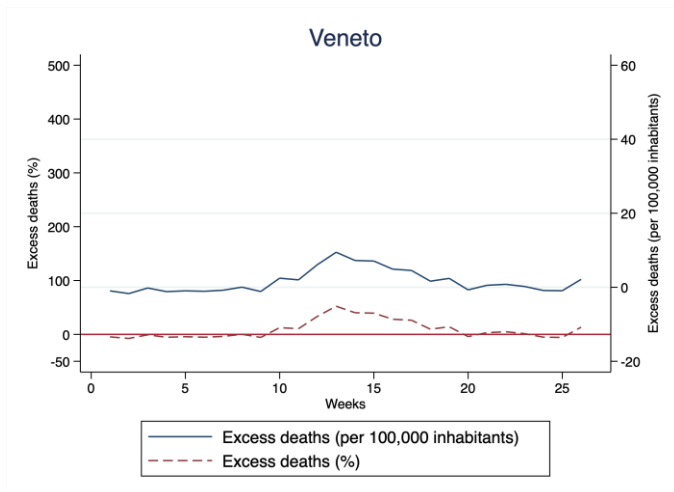

## LITHUANIA

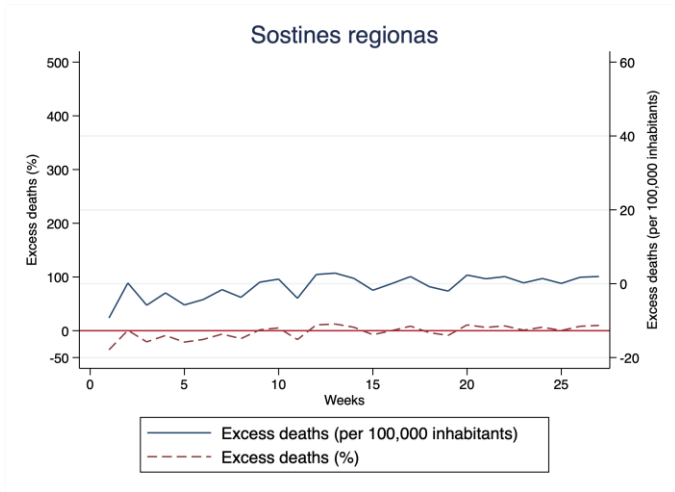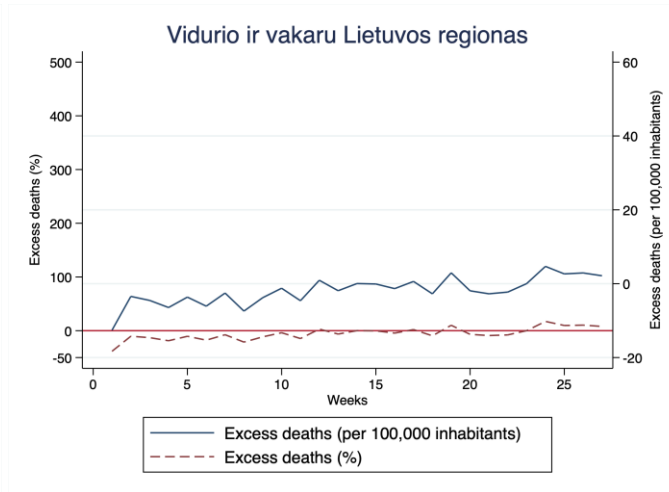

## LUXEMBOURG

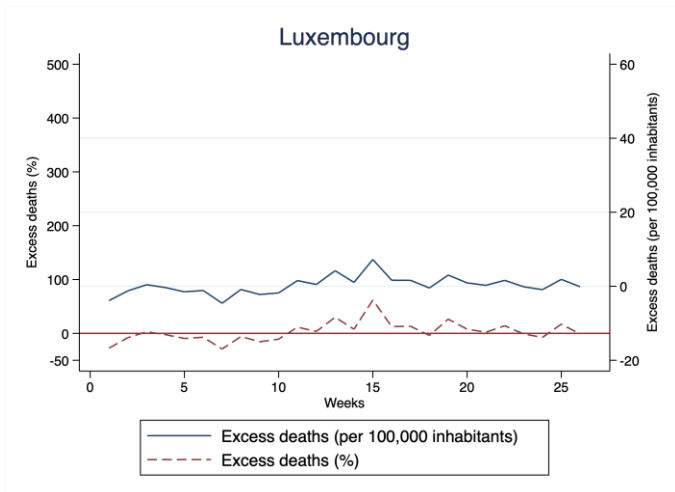



# LATVIA

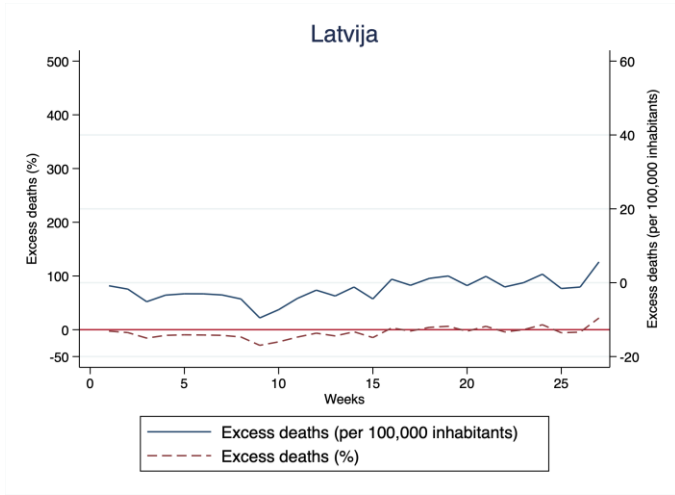

# NETHERLANDS

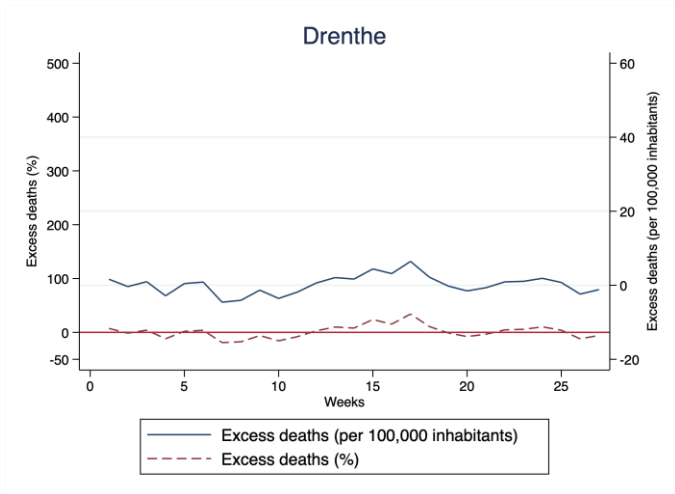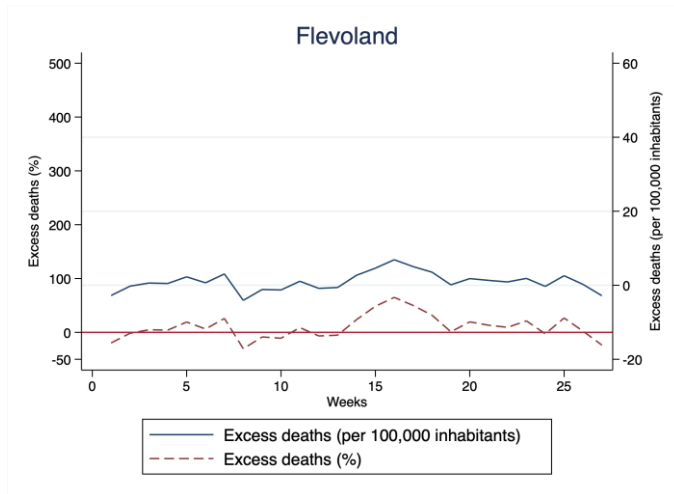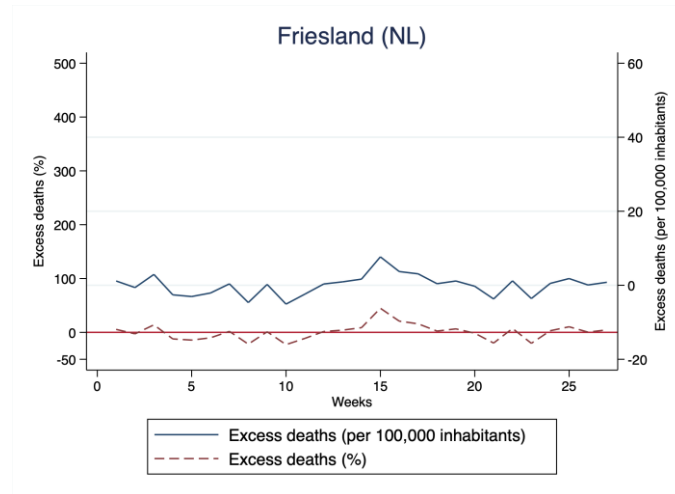

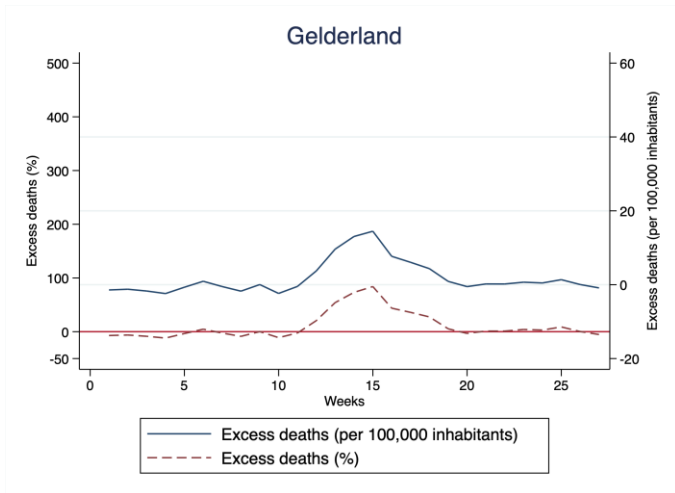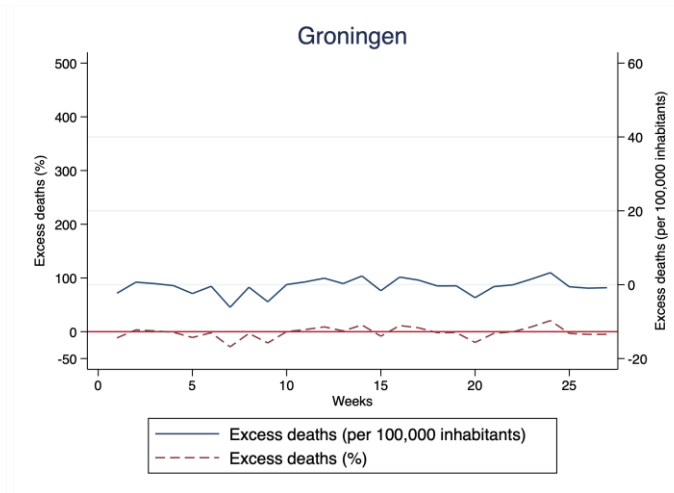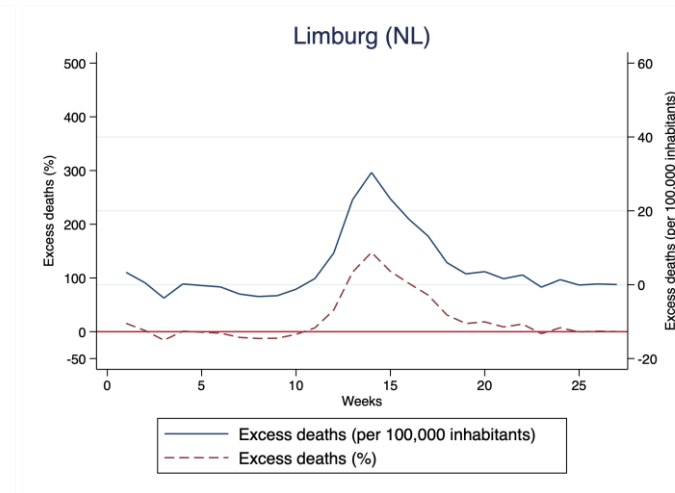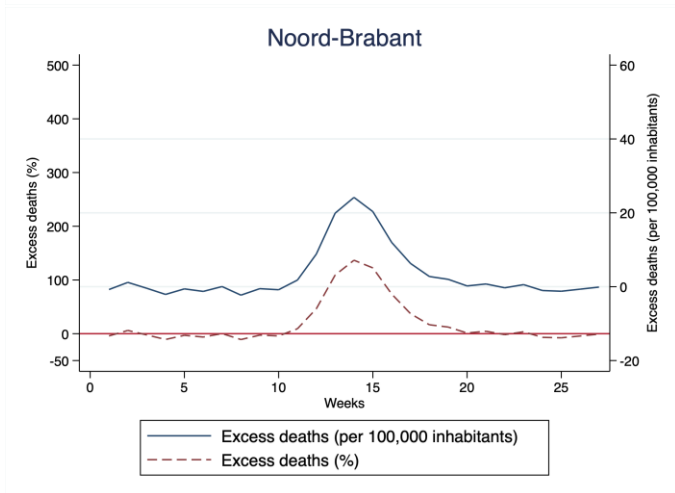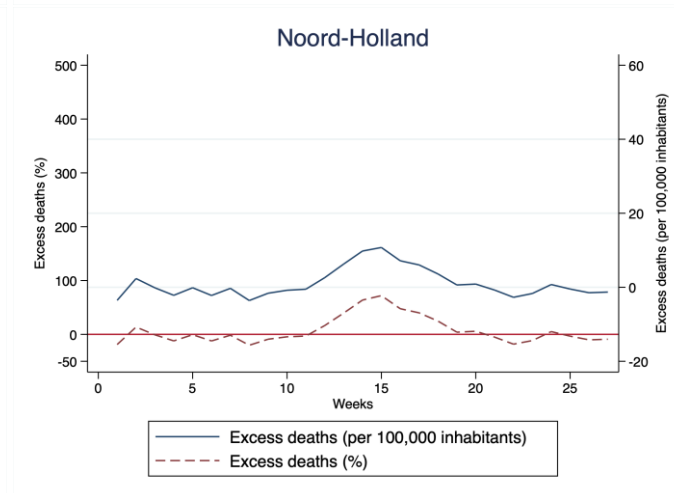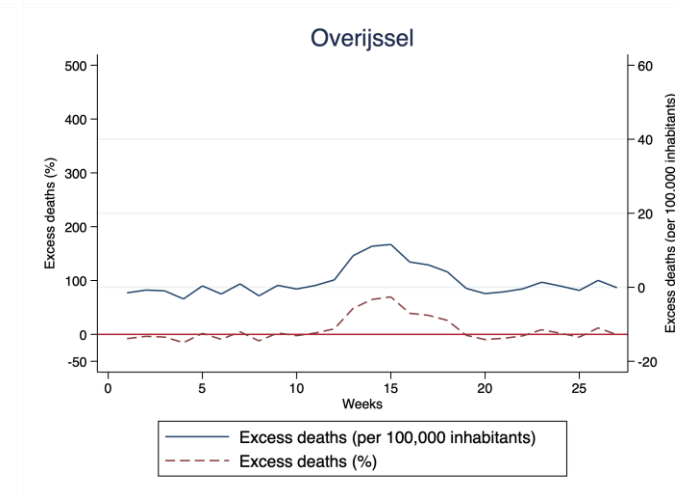

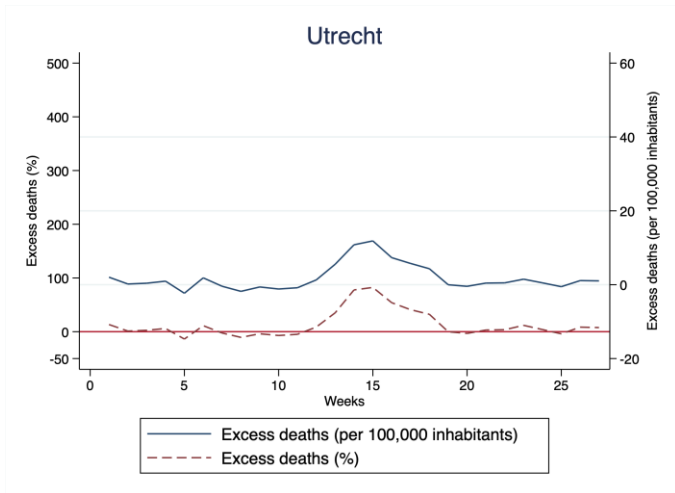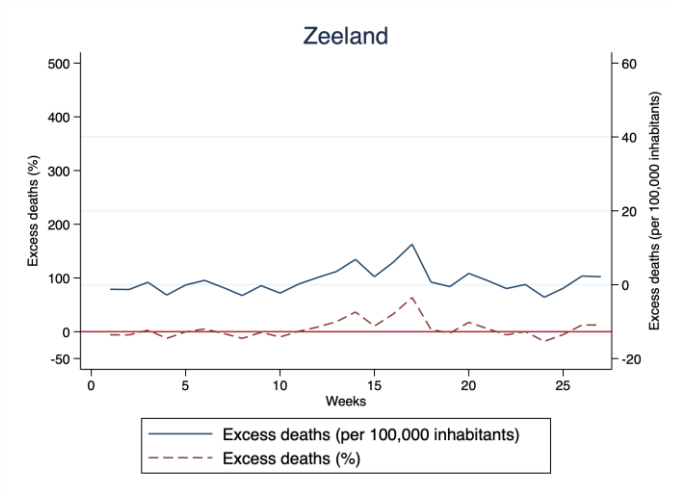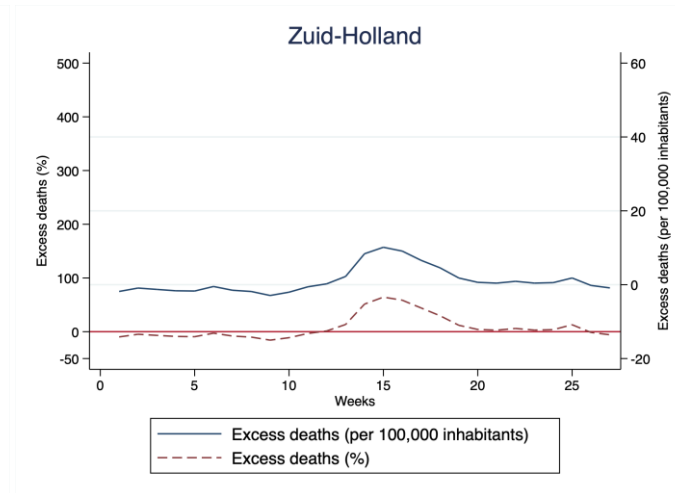

## NORWAY

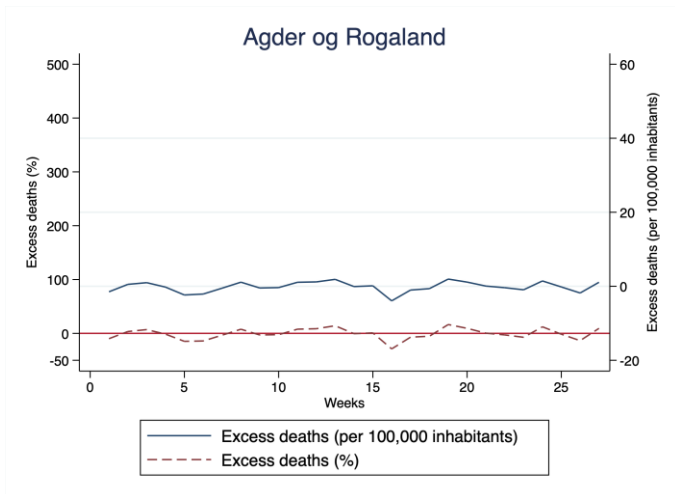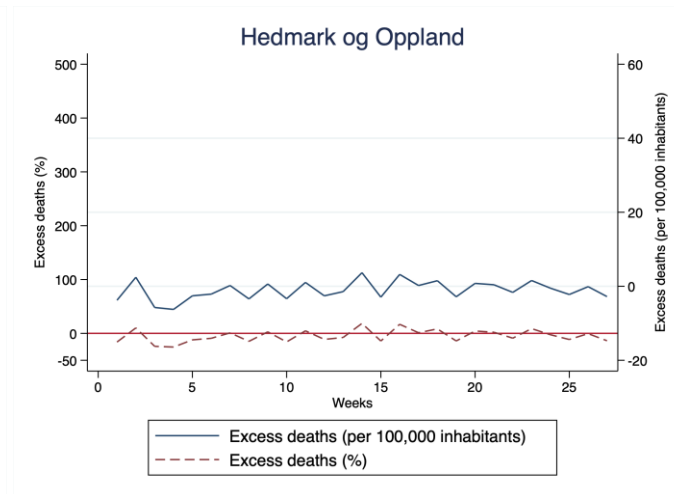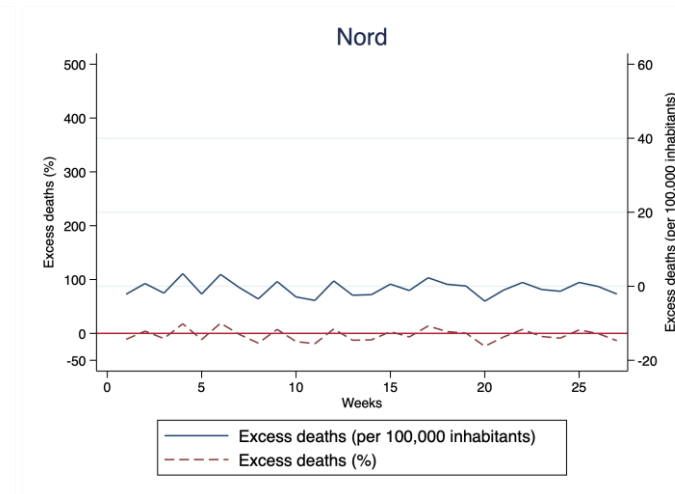

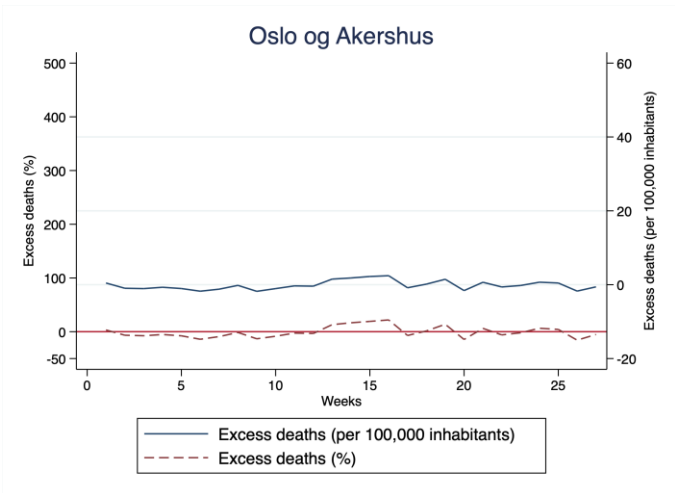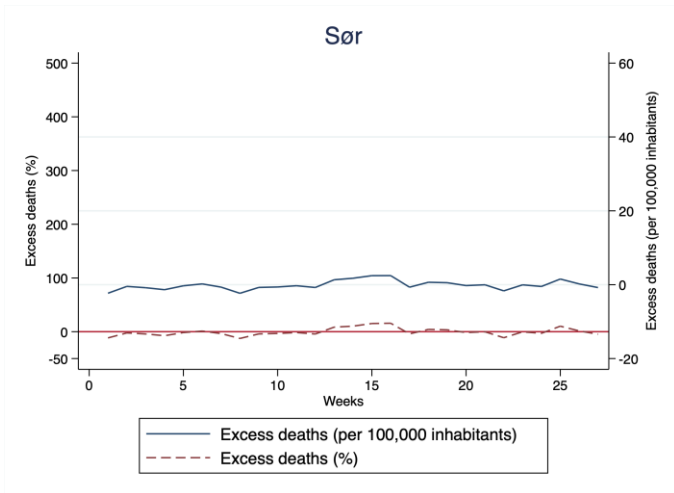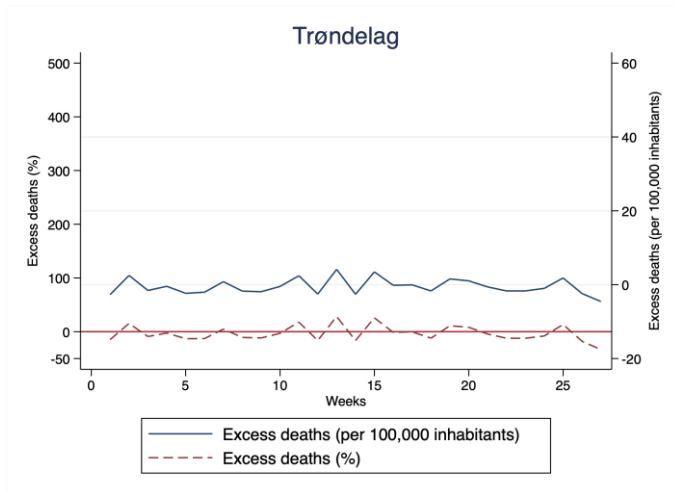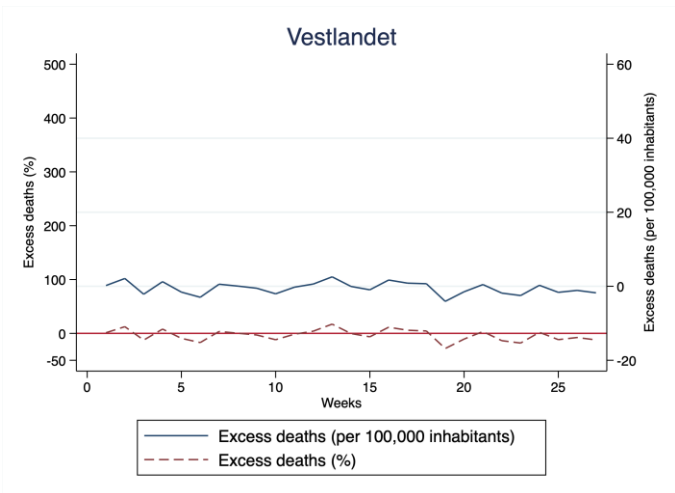

# POLAND

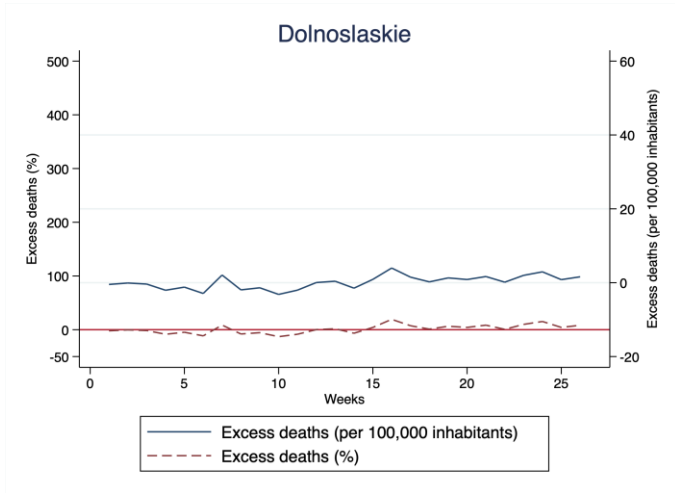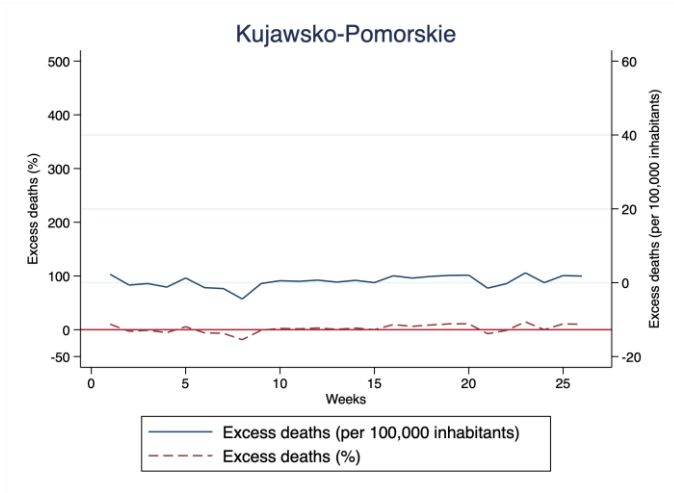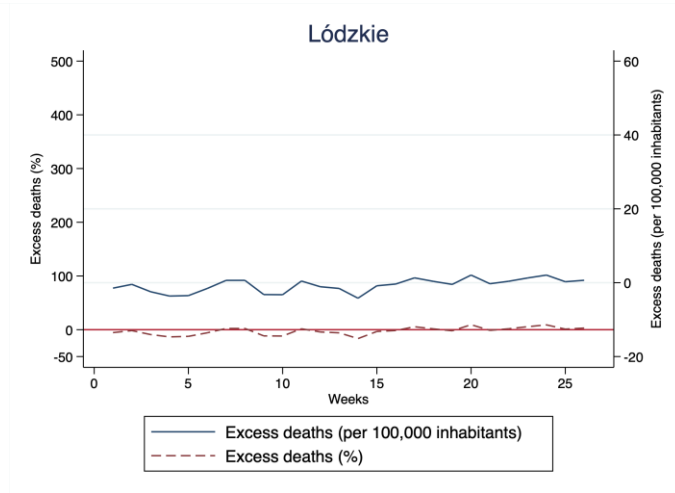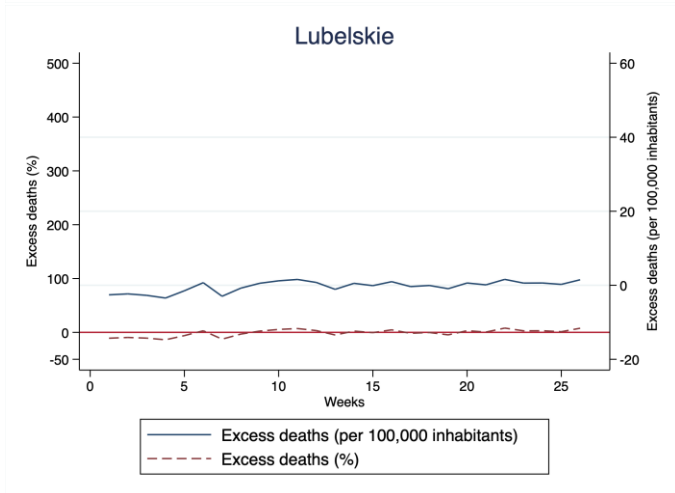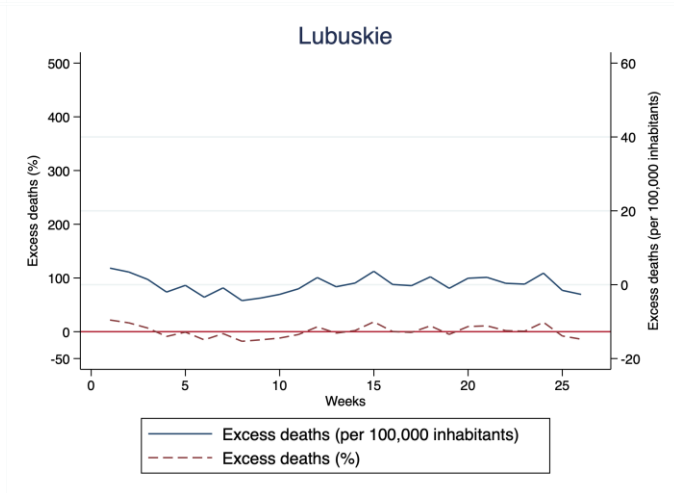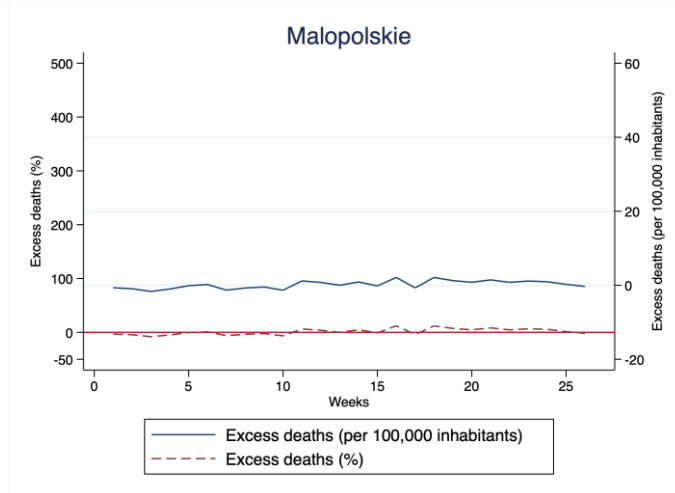

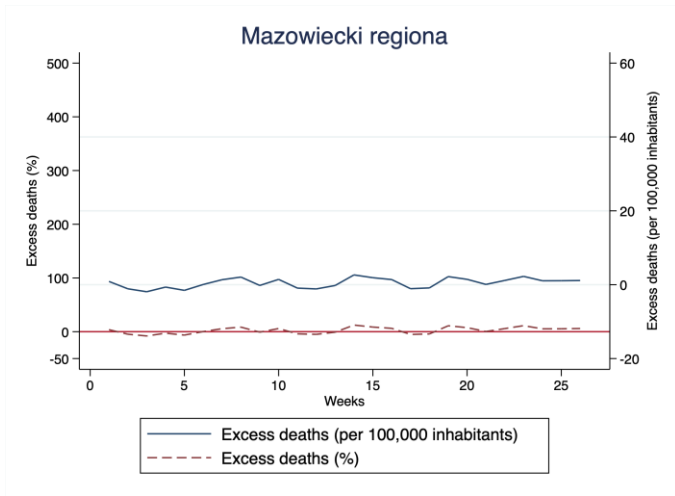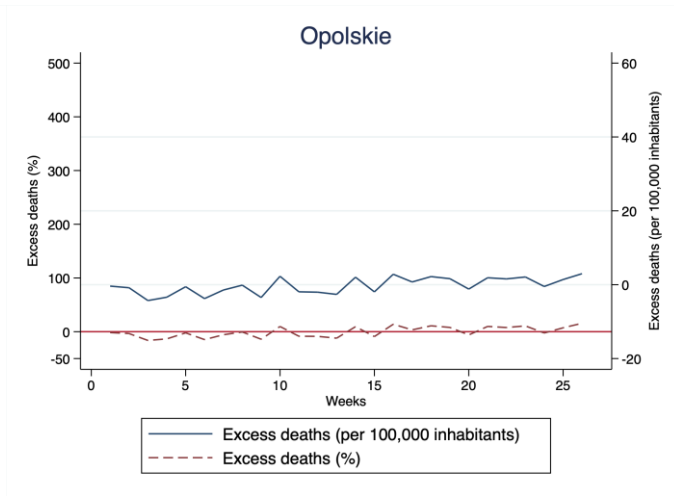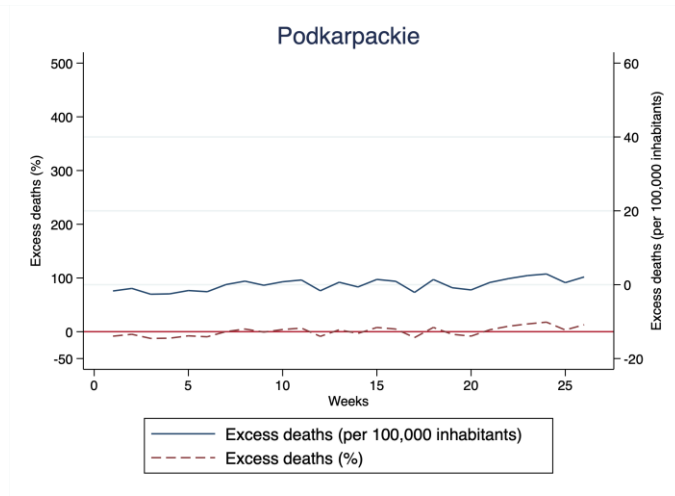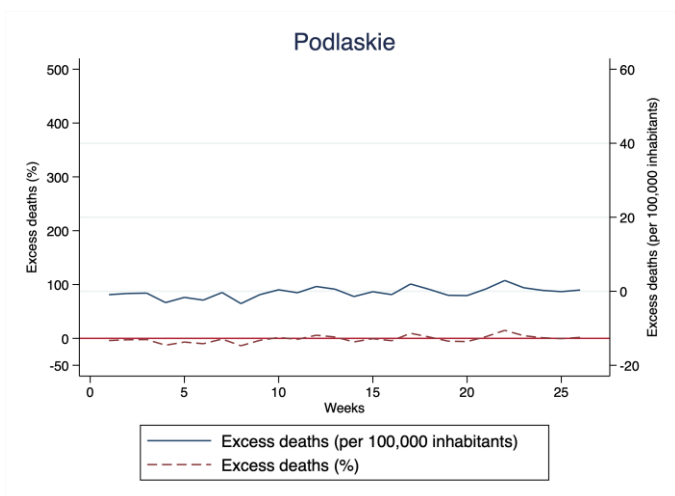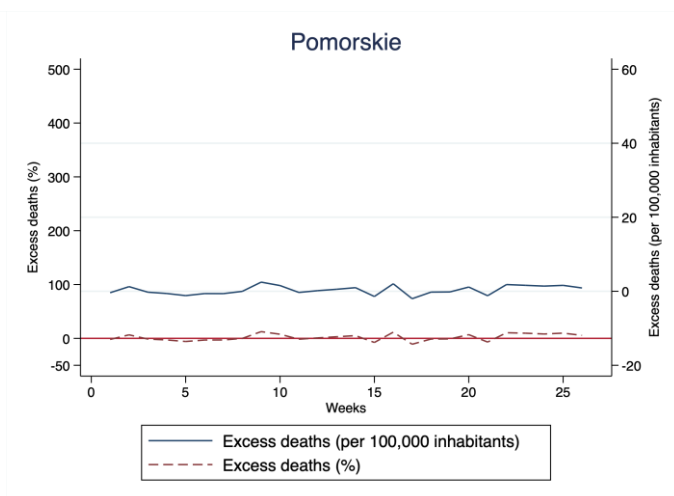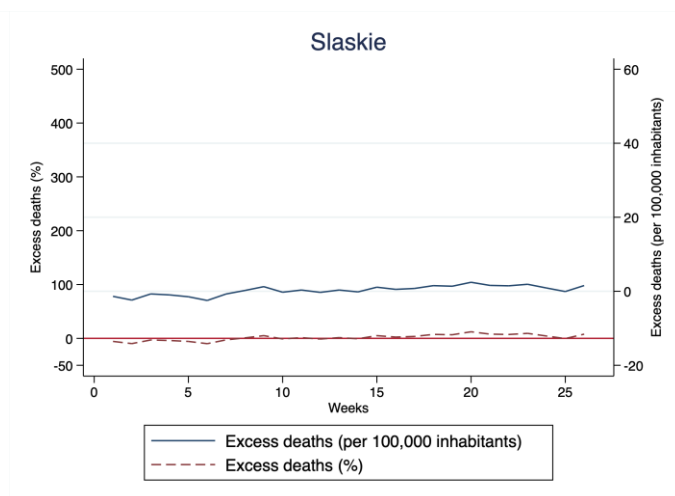

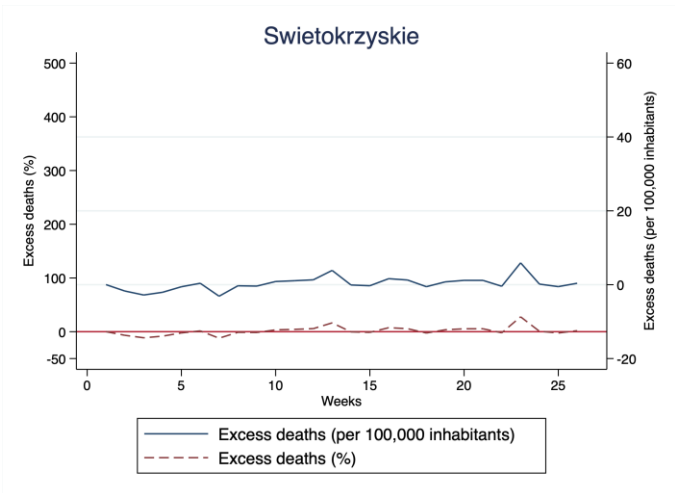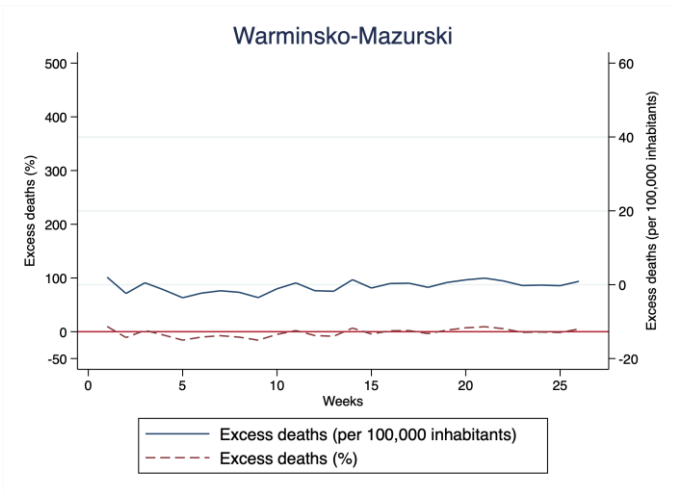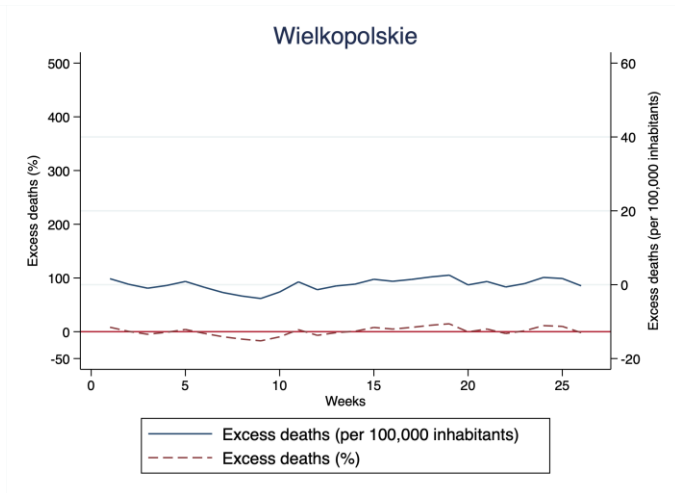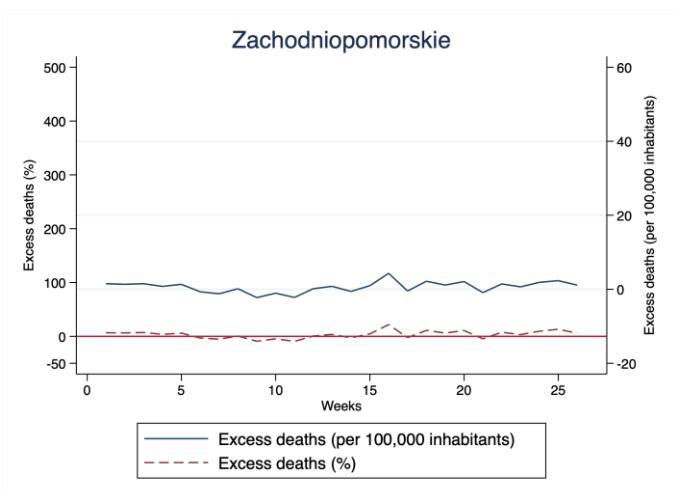

# PORTUGAL

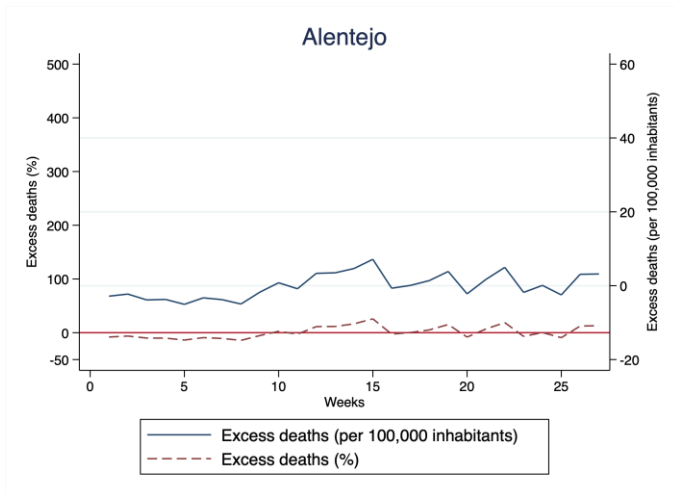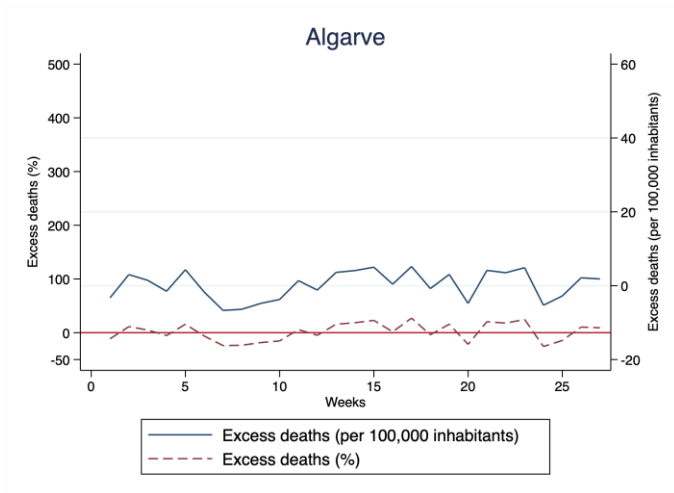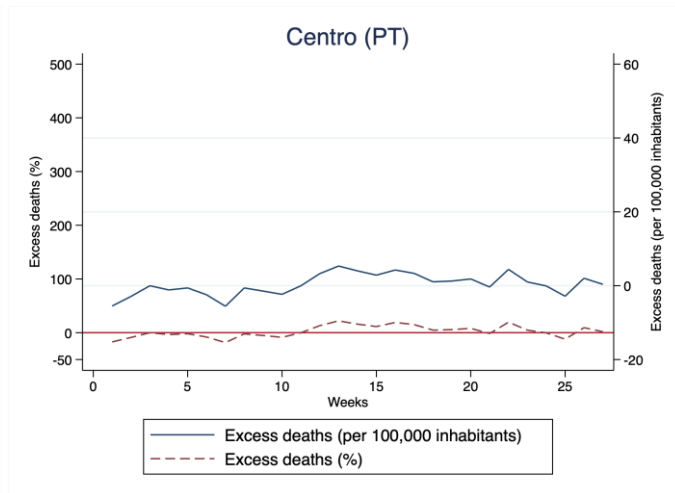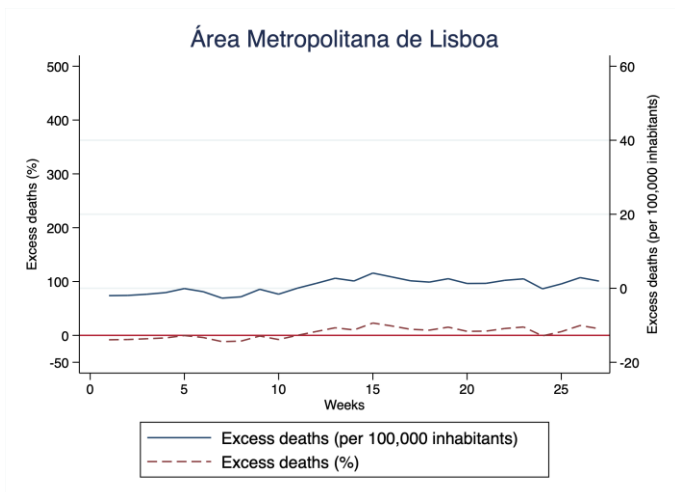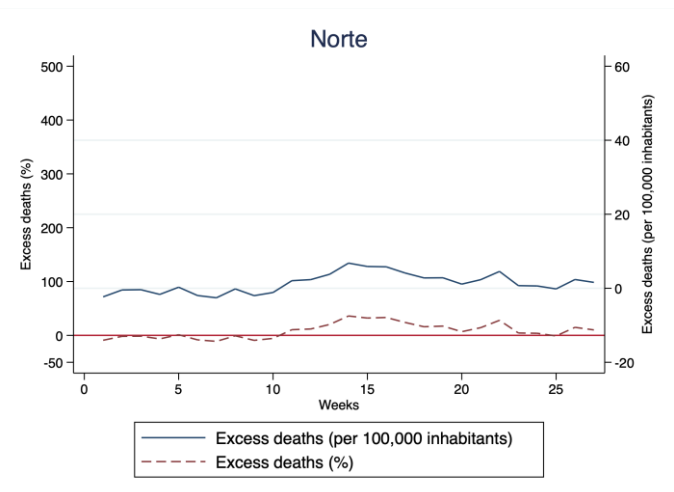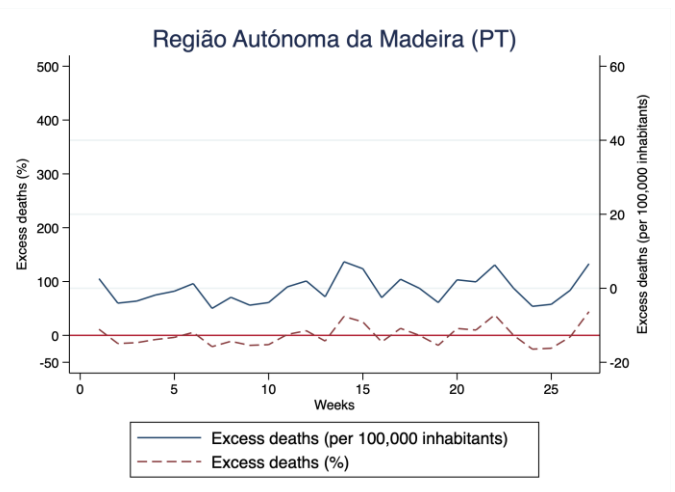



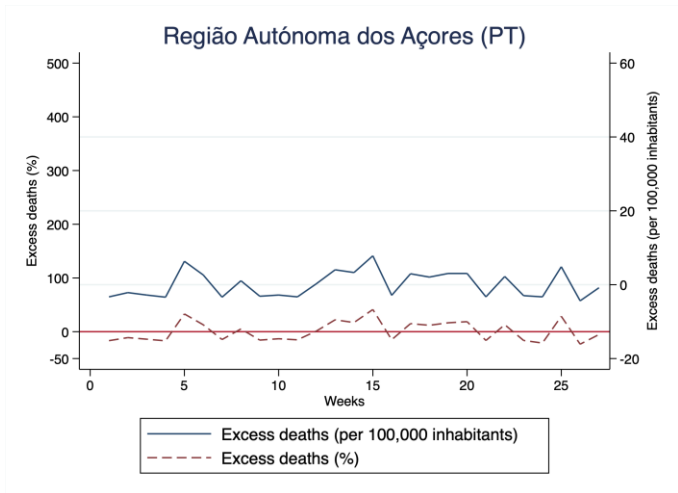

## SLOVAKIA

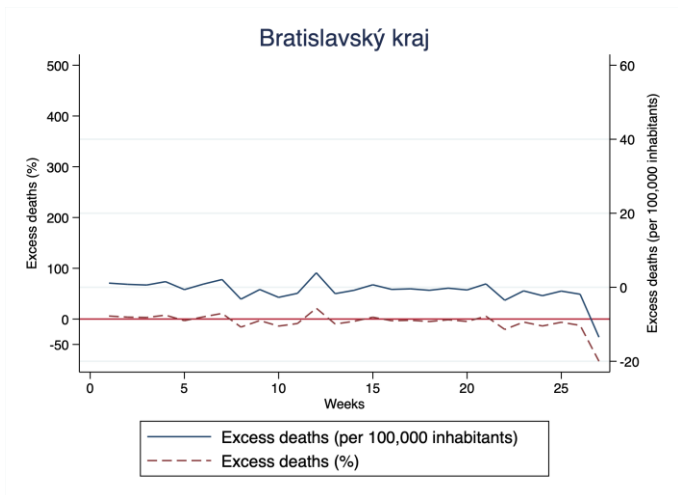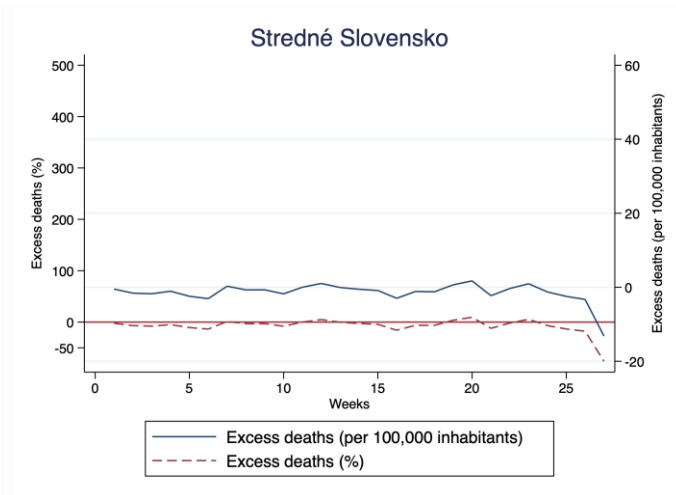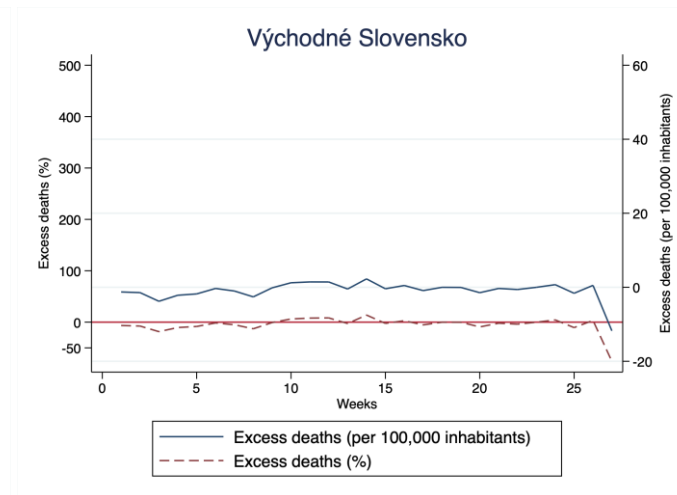

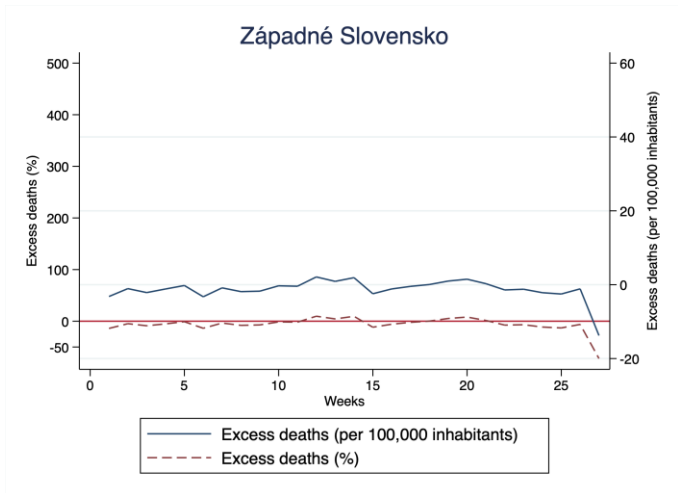

## SPAIN

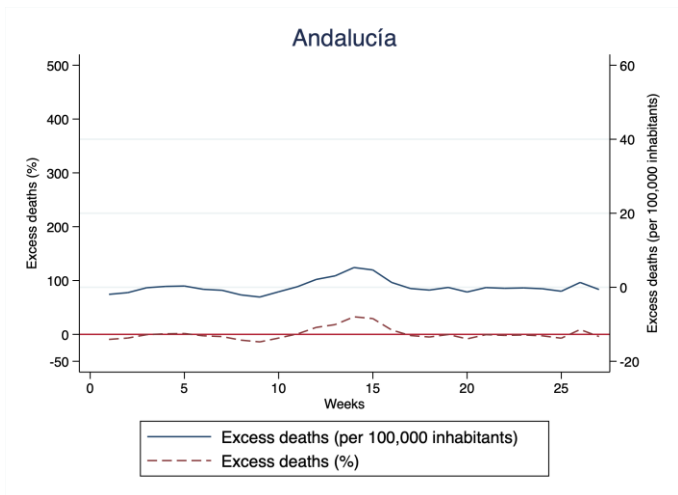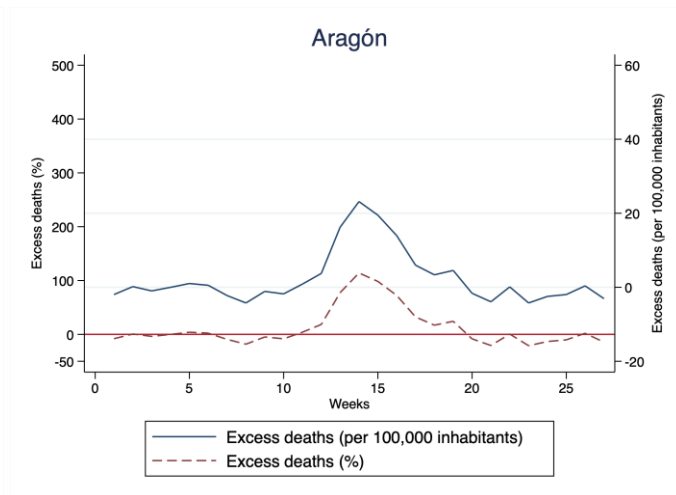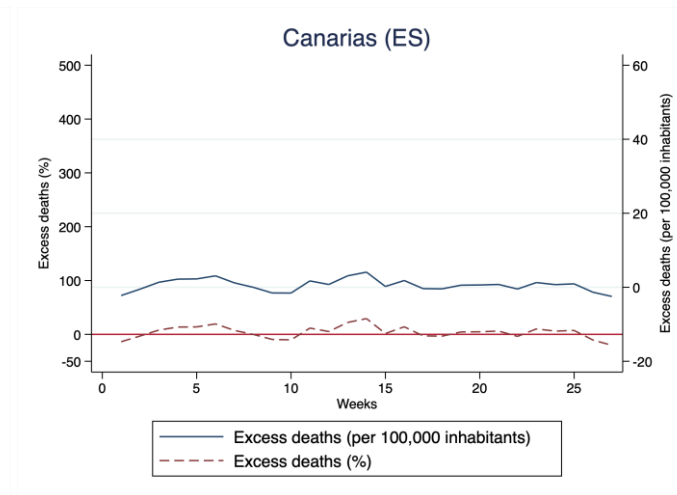

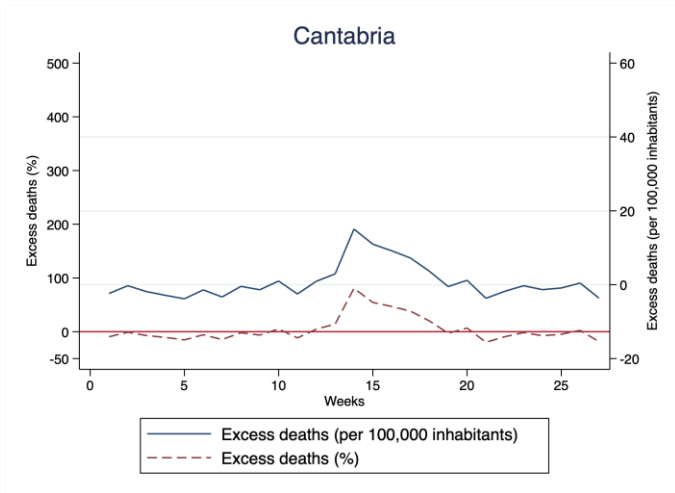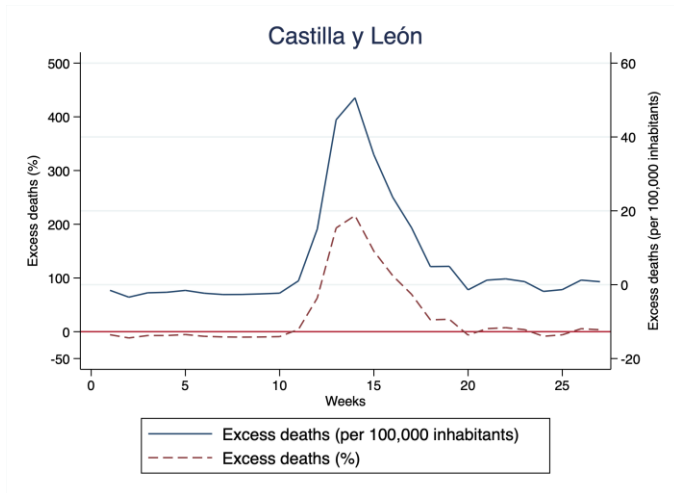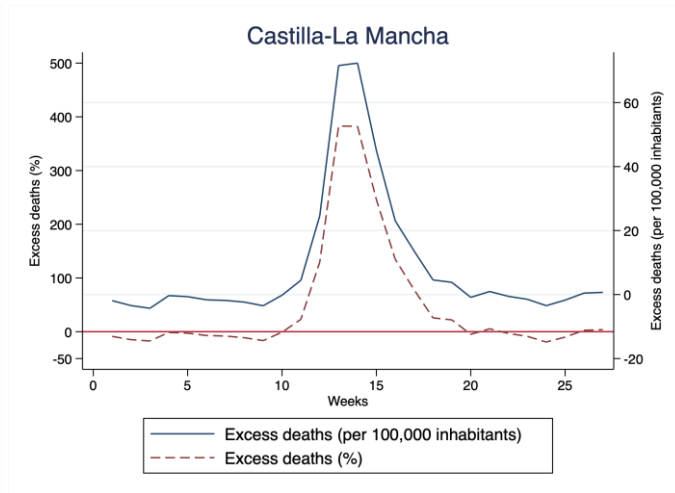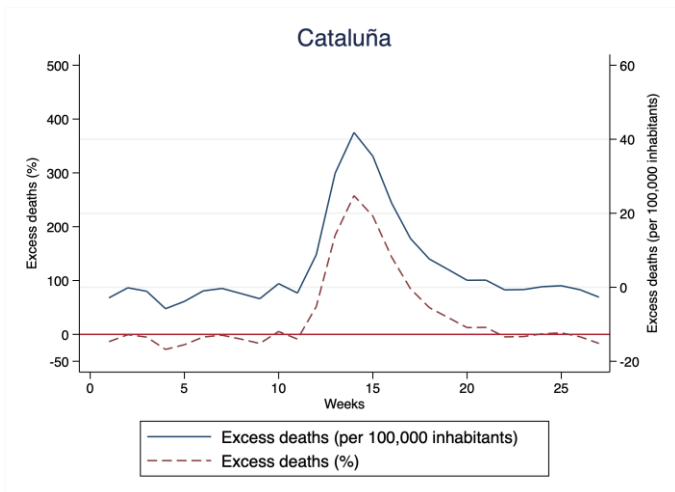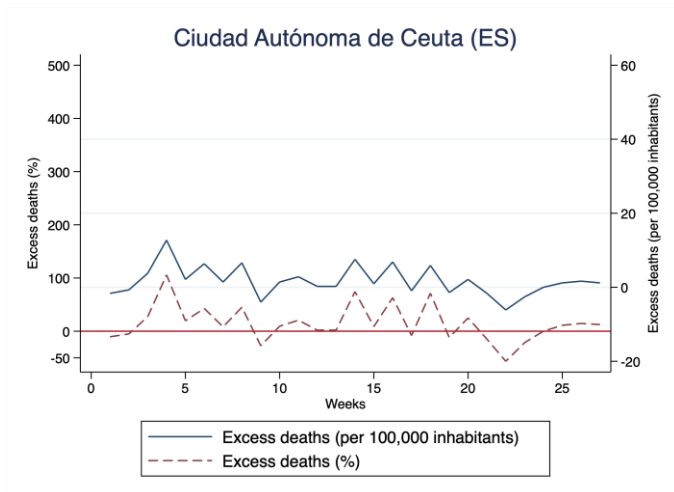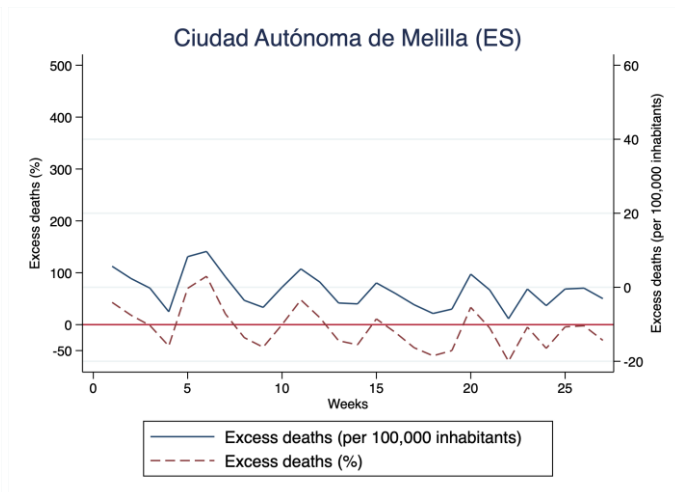

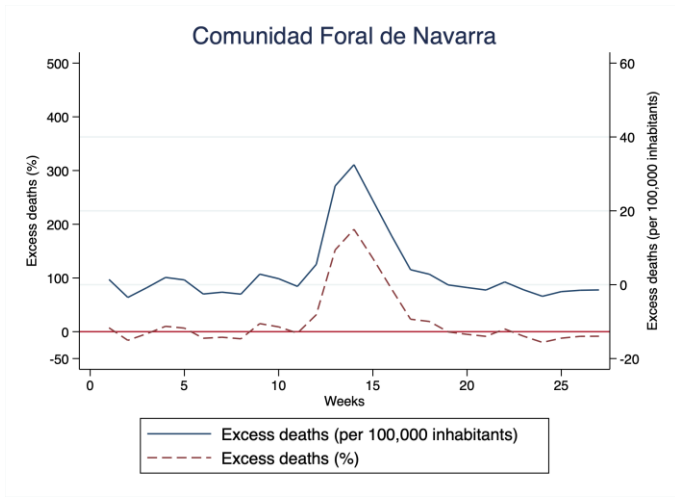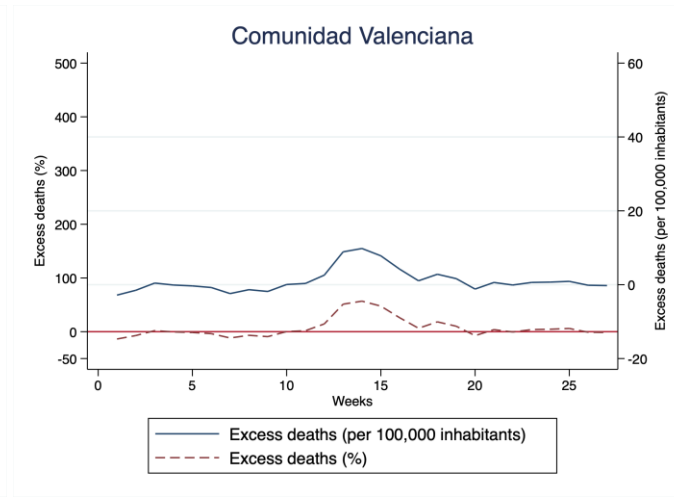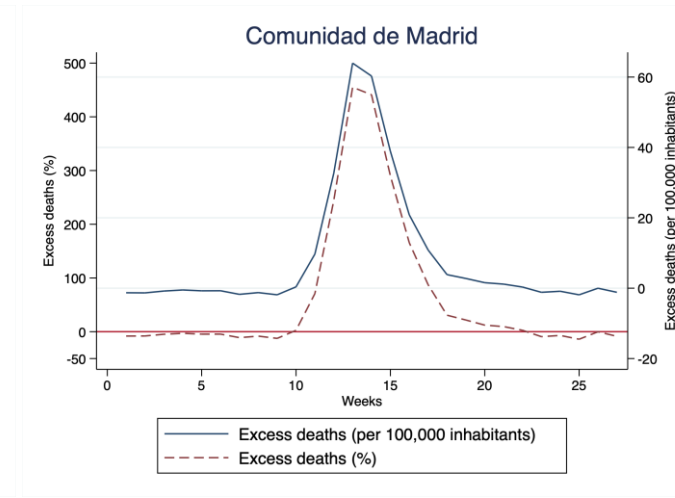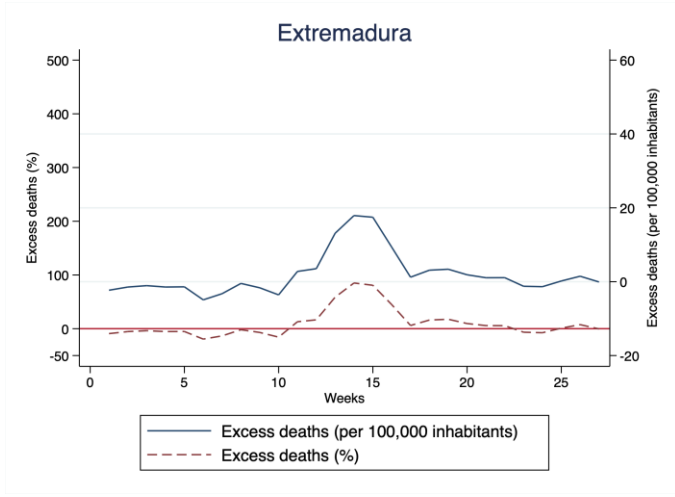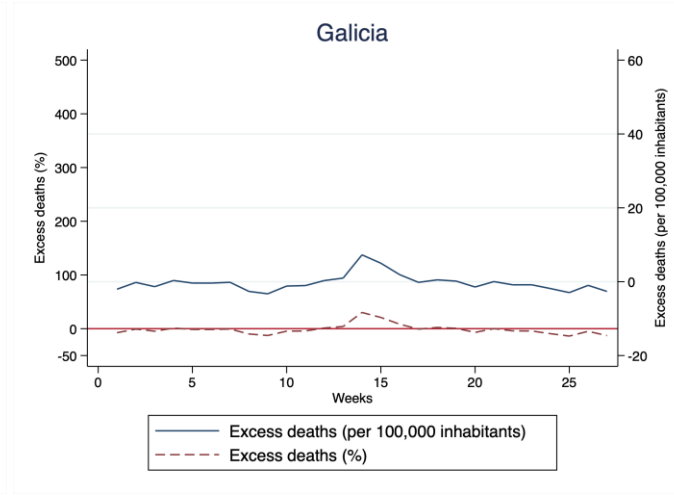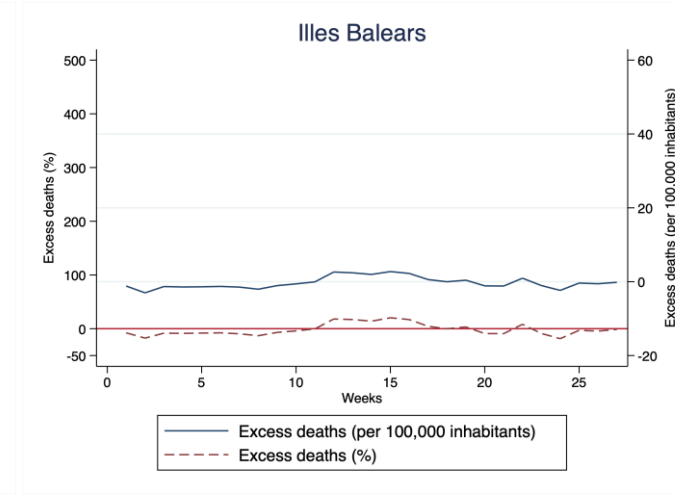

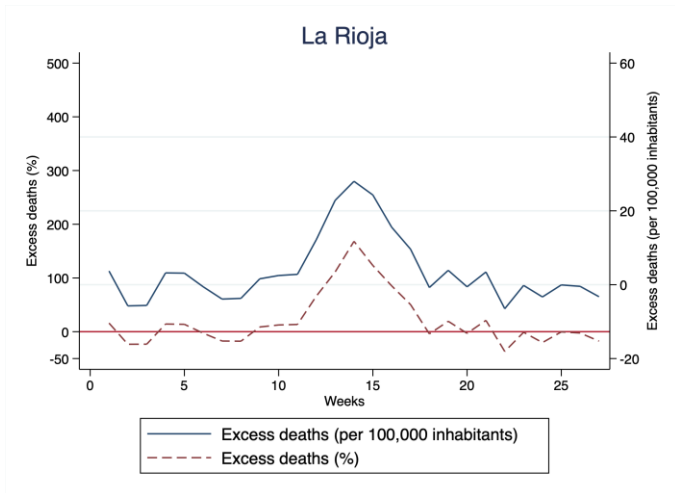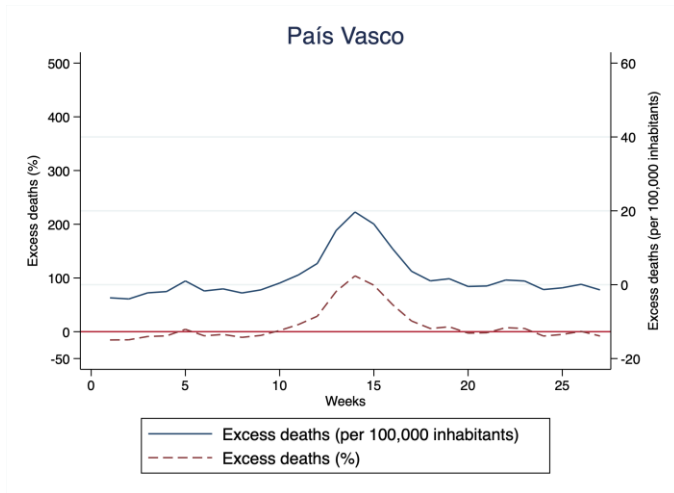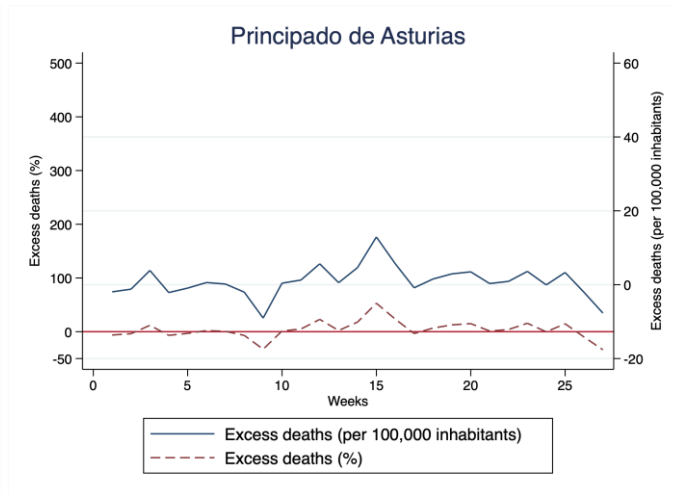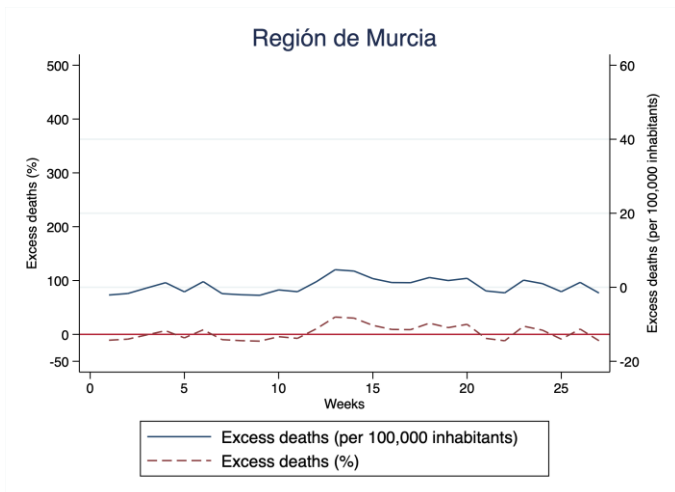

# SWEDEN

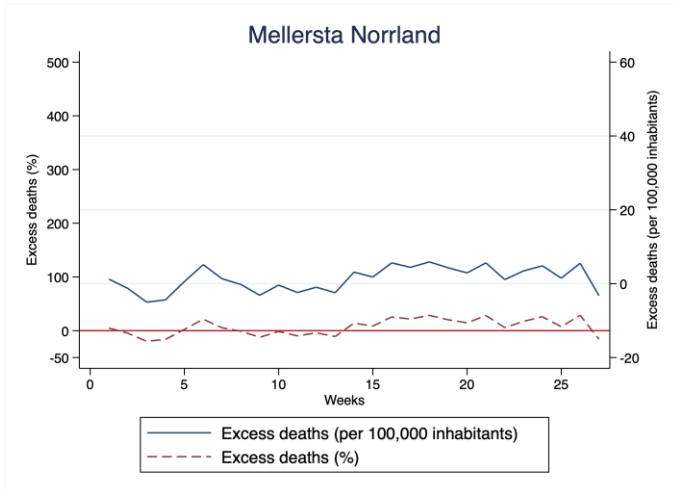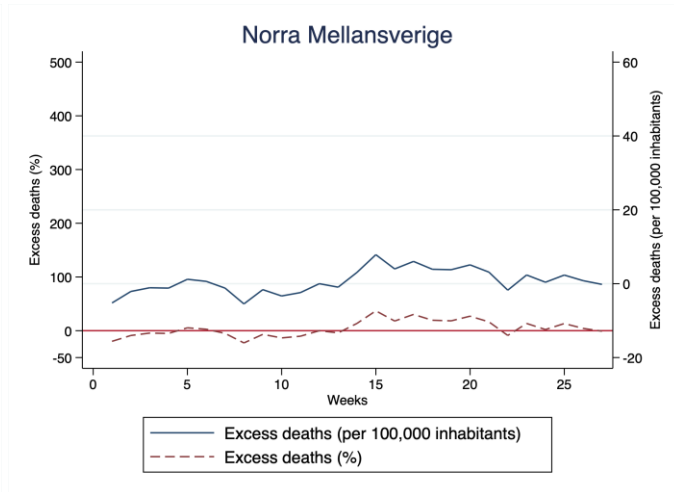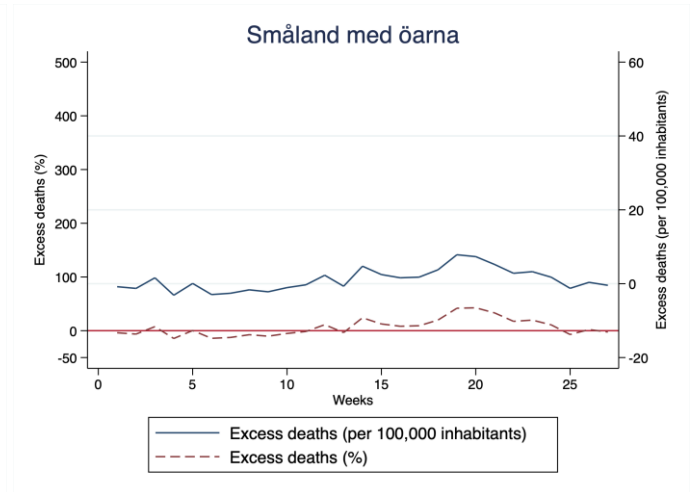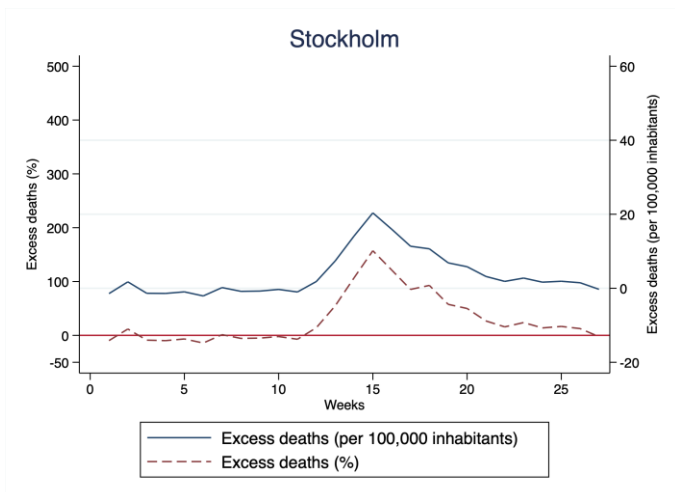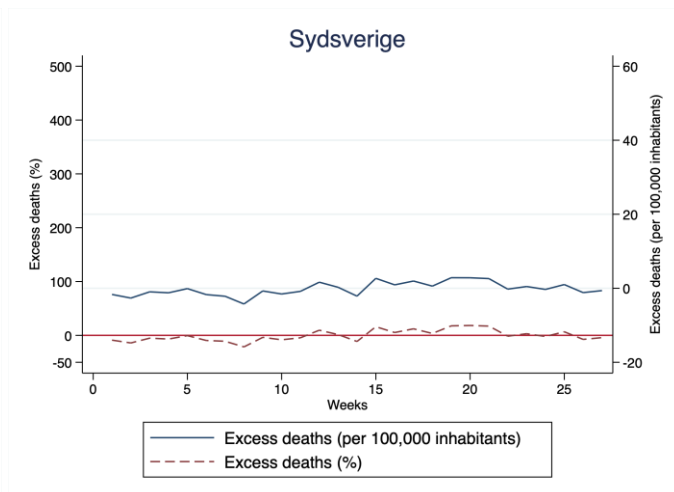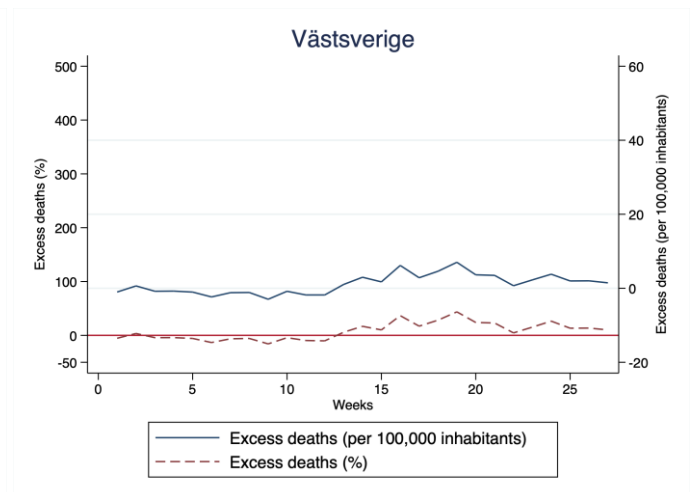

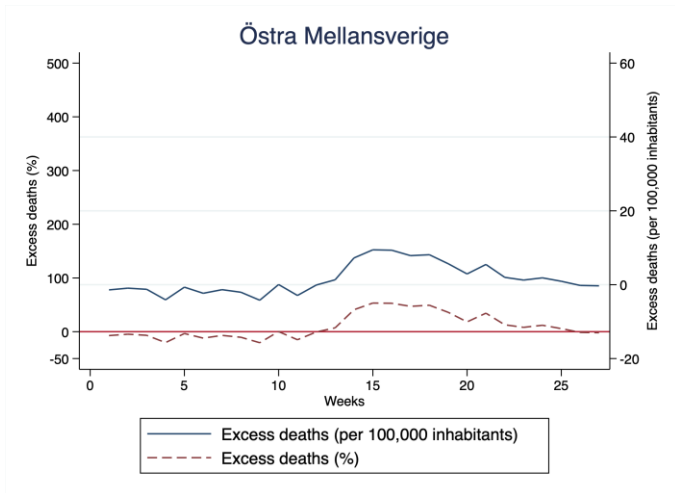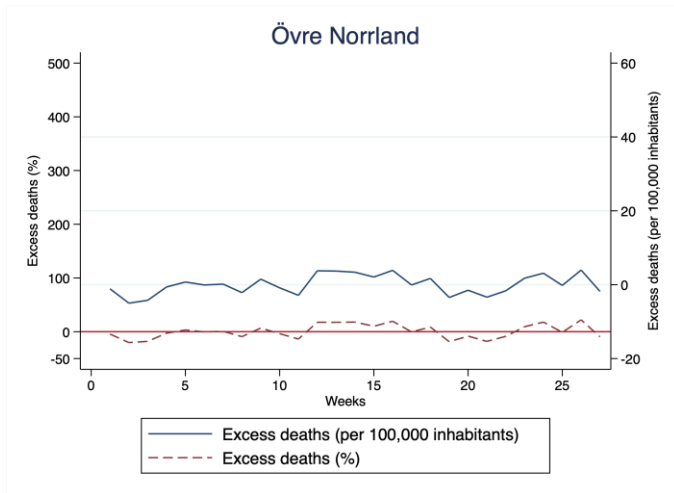

## SWITZERLAND

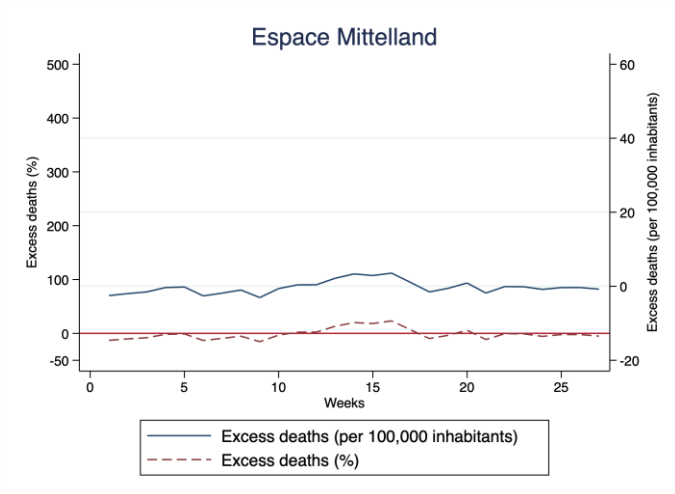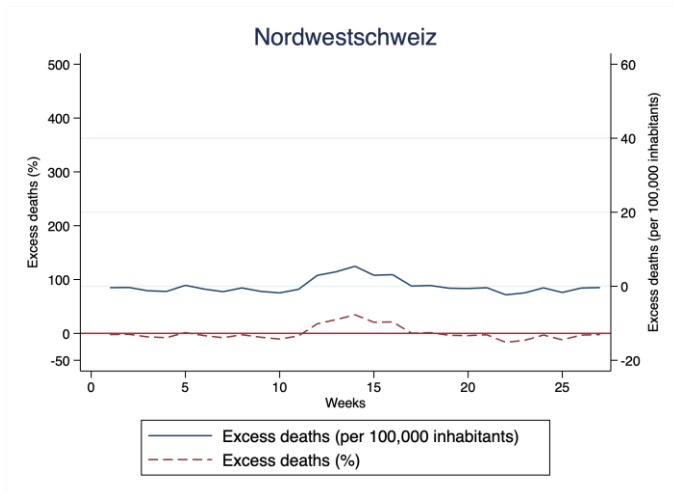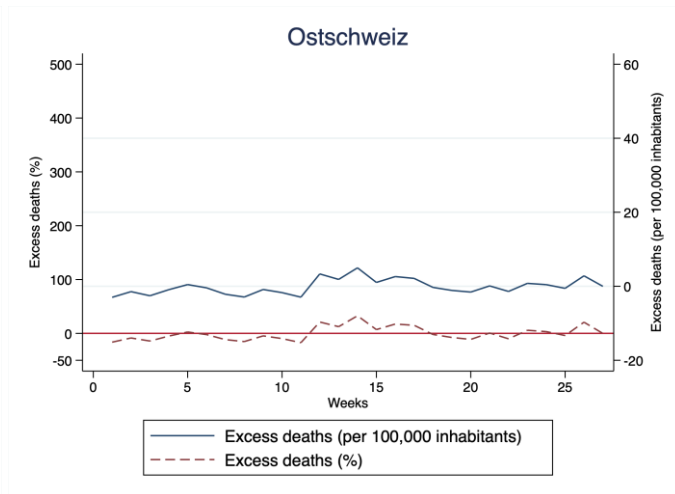

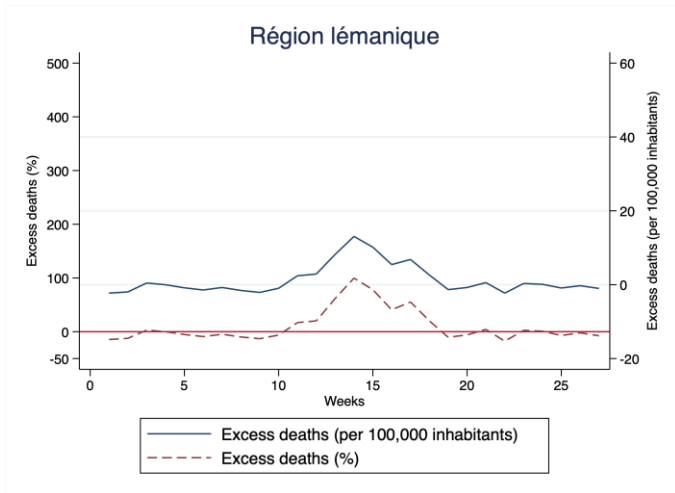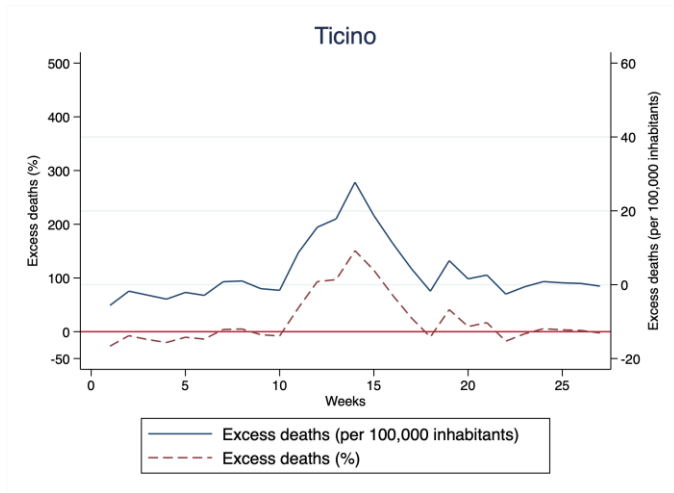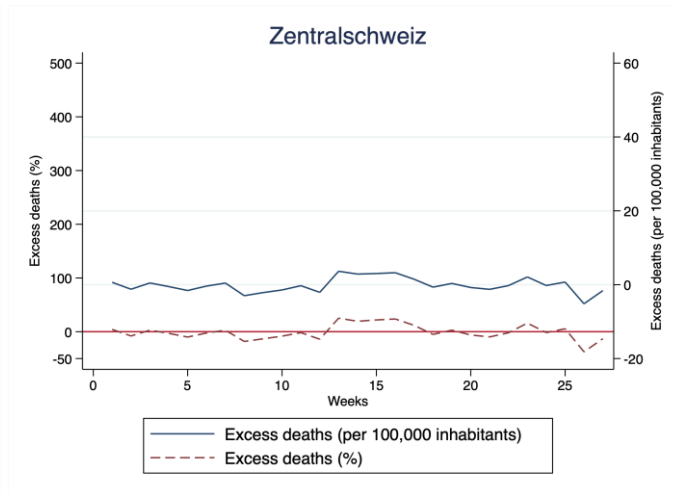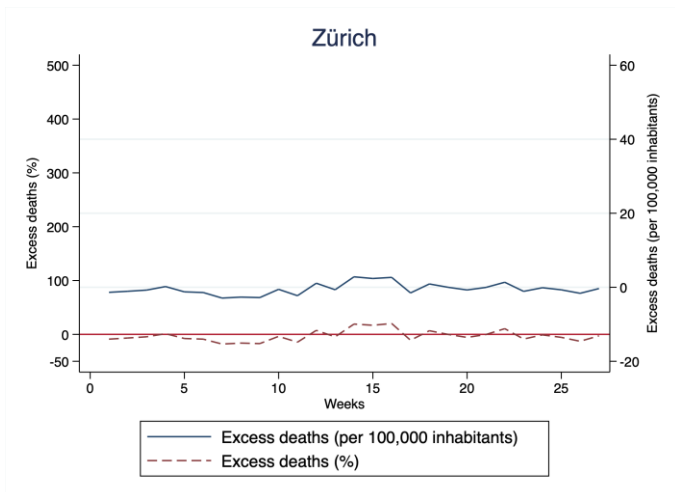



# UNITED KINGDOM

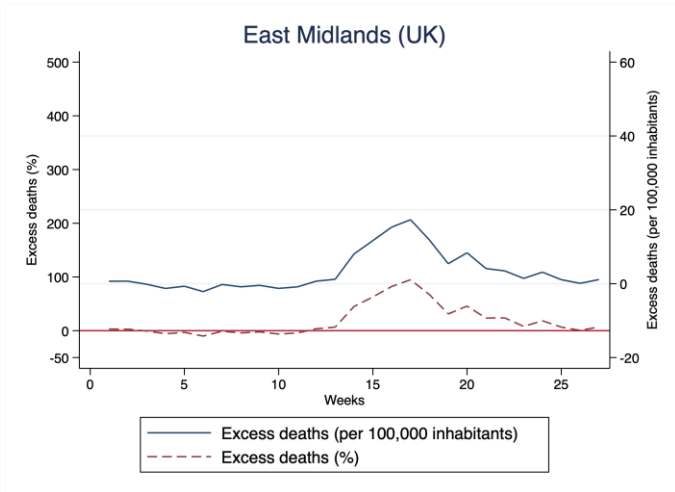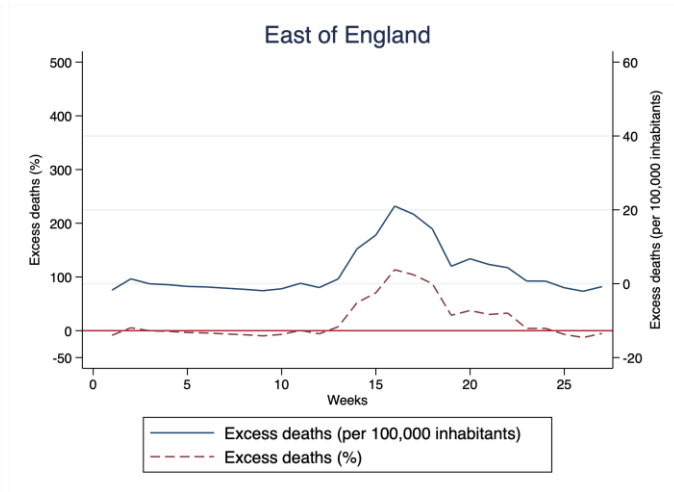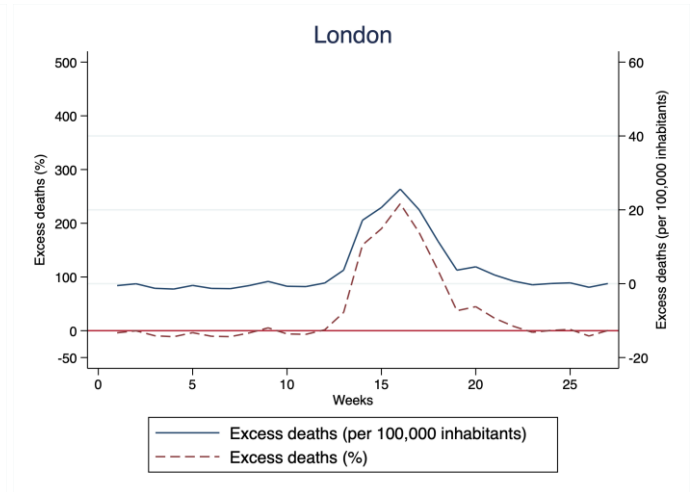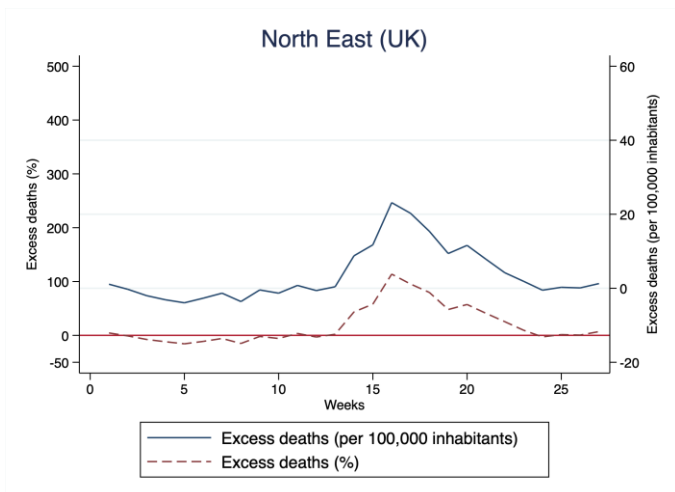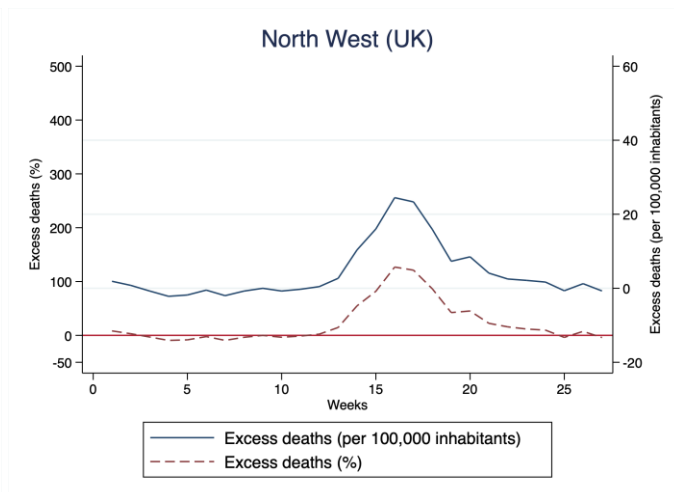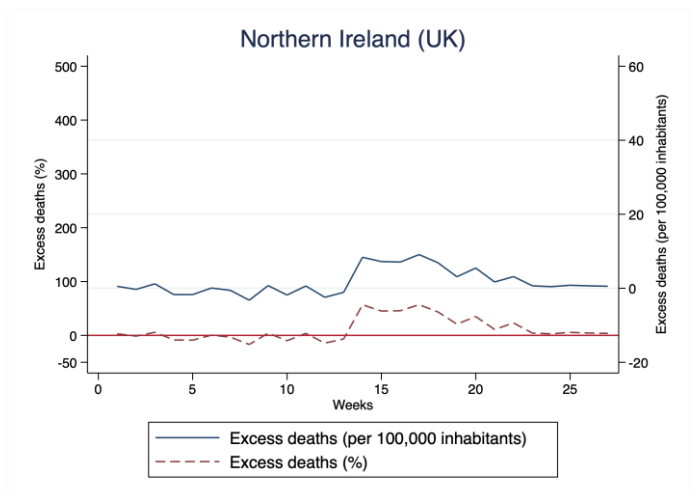

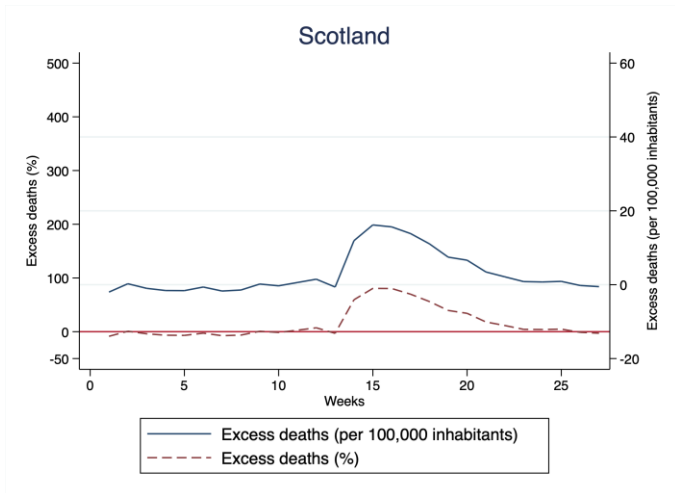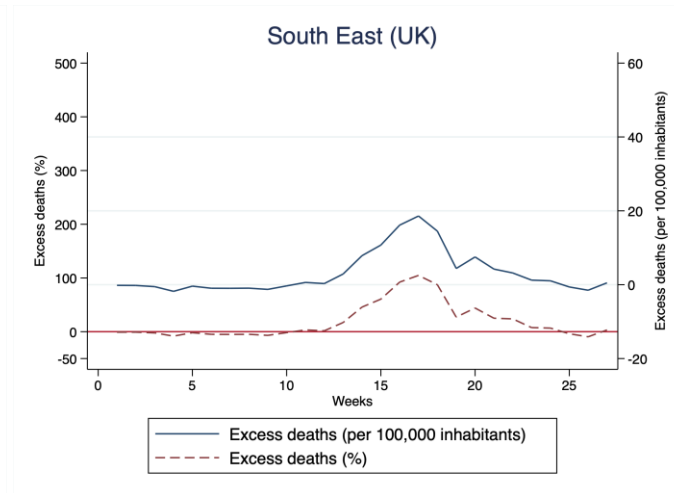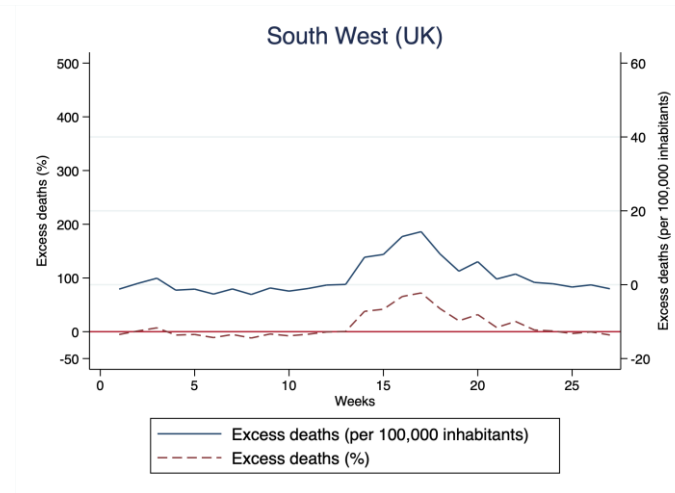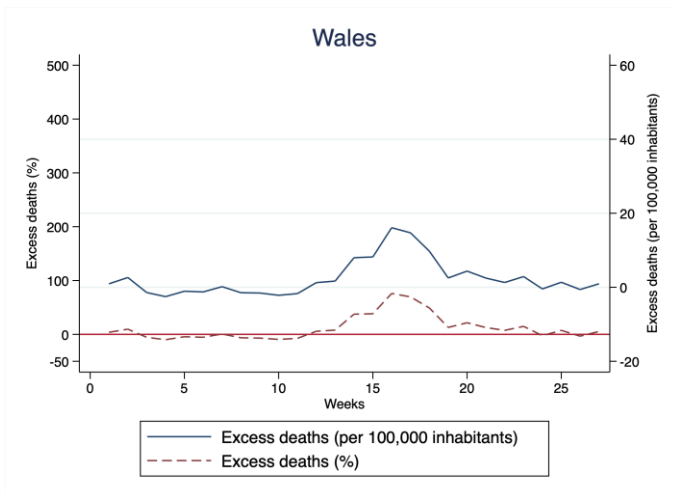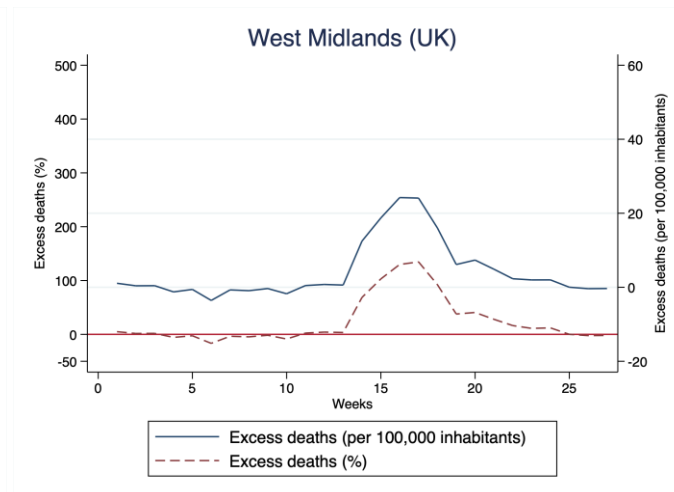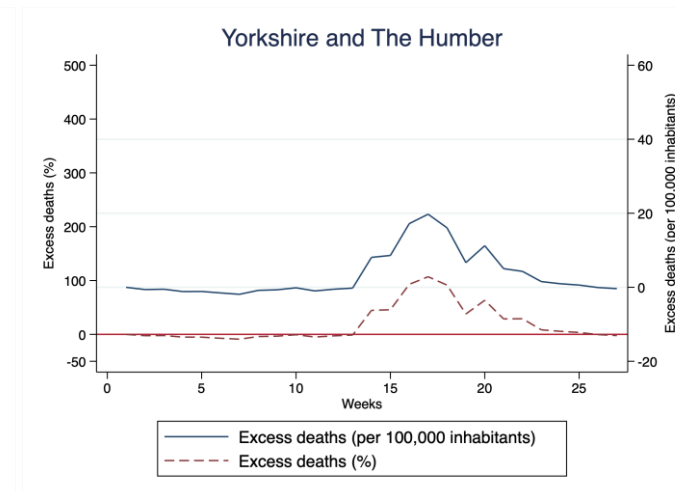

## APPENDIX B

**Table B1.** Variable description

| Macro-Area                     | Variable                              | Year | Description                                                                          | Level  | Source                                                  |
|--------------------------------|---------------------------------------|------|--------------------------------------------------------------------------------------|--------|---------------------------------------------------------|
| Agglomeration                  | Population                            | 2019 | Number of inhabitants                                                                | NUTS2  | EUROSTAT                                                |
|                                | GDP                                   | 2018 | Gross Domestic Product                                                               | NUTS2  | EUROSTAT                                                |
| Regional Wealth                | GDP per capita                        | 2018 | Share of GDP per 100,000 inhabitants                                                 | NUTS2  | EUROSTAT                                                |
| Density                        | Population density                    | 2018 | Population per km <sup>2</sup>                                                       | NUTS2  | EUROSTAT                                                |
| Accessibility and connectivity | Air passengers                        | 2018 | Air transport of passengers                                                          | NUTS2  | EUROSTAT                                                |
|                                | Accessibility by road                 | 2014 | Road accessibility measured as the inverse time-distance weighted population         | NUTS2  | Raw data gathered by Klaus Spiekermann<br>EU Commission |
| Age structure                  | Median population age                 | 2019 | Median age of the population                                                         | NUTS2  | EUROSTAT                                                |
|                                | Share of population over 65           | 2019 | Number of people over 65 years old over the total population                         | NUTS2  | EUROSTAT                                                |
|                                | Share of population over 75           | 2019 | Number of people over 75 years old over the total population                         | NUTS2  | EUROSTAT                                                |
| Education                      | Share of adults with higher education | 2017 | Adult population (aged 25 to 64 years old) with tertiary education (5-8 ISCED level) | NUTS2  | EUROSTAT                                                |
| Health system                  | Doctors per capita                    | 2017 | Number of doctors over population                                                    | NUTS2  | EUROSTAT                                                |
|                                | Hospital beds per capita              | 2017 | Number of hospital beds over population                                              | NUTS2  | EUROSTAT                                                |
| Air pollution                  | Air pollution                         | 2016 | Exposure to air pollution by particulate matter (PM 2.5)                             | NUTS 0 | OECD                                                    |
|                                | Total household carbon footprint      | 2010 | Total household carbon footprint (kgCO <sub>2</sub> e/cap)                           | NUTS2  | Ivanova et al. (2017)                                   |

|                        |                                                    |           |                                                                                                             |       |                                                   |
|------------------------|----------------------------------------------------|-----------|-------------------------------------------------------------------------------------------------------------|-------|---------------------------------------------------|
|                        | Average household carbon footprint                 | 2010      | Total household carbon footprint (kgCO <sub>2</sub> e/cap) per family                                       | NUTS2 | Ivanova et al. (2017)                             |
| Climate                | Average temperature                                | 2019      | Average temperature in C°                                                                                   | NUTS2 | Agri-4-Cast EU-JRC                                |
|                        | Average precipitation                              | 2019      | Average precipitation (mm)                                                                                  | NUTS2 | Agri-4-Cast EU-JRC                                |
| Autonomy               | Regional autonomy                                  | 2016      | Regional Authority Index (RAI)                                                                              | NUTS2 | Hooghe et al. (2016)                              |
| Government Quality     | Regional government quality                        | 2017      | European Quality of Government Index (EQI)                                                                  | NUTS2 | Charron et al. (2016)<br>University of Gothenburg |
|                        | Change in regional government quality              | 2017-2010 | European Quality of Government Index (EQI)                                                                  | NUTS2 | Charron et al. (2016)<br>University of Gothenburg |
|                        | National government effectiveness                  | 2018      | Worldwide Governance Indicators                                                                             | NUTS0 | Kaufmann and Kraay (2020)<br>World Bank           |
|                        | Change in national government effectiveness        | 2018-1998 | Worldwide Governance Indicators                                                                             | NUTS0 | Kaufmann and Kraay (2020)<br>World Bank           |
| Social capital & trust | Frequency of meeting friends (once a week or more) | 2016      | Share of the population meeting friends & family socially at least once a week                              | NUTS2 | European Social Survey                            |
|                        | Generalised trust                                  | 2016      | Level of trust in others                                                                                    | NUTS2 | European Social Survey                            |
|                        | Bridging networks                                  | 2016      | Participation in voluntary association that encourage relationships between dissimilar or unfamiliar people | NUTS2 | European Social Survey                            |

**Table B2.** Summary statistics

| VARIABLES                                             | (1) | (2)     | (3)      | (4)    | (5)    |
|-------------------------------------------------------|-----|---------|----------|--------|--------|
|                                                       | N   | Mean    | St. Dev. | Min.   | Max    |
| Excess mortality (%)                                  | 206 | 4.354   | 10.35    | -7.712 | 60.86  |
| Excess mortality (x 100,00 inhab)                     | 206 | 19.16   | 49.91    | -77.95 | 247.0  |
| Median population age 2019                            | 211 | 43.27   | 3.790    | 17.70  | 51     |
| Share of adults with higher education 2017            | 209 | 38.86   | 10.82    | 18.90  | 74     |
| Regional government quality 2017                      | 190 | 0.125   | 0.963    | -2.264 | 2.323  |
| Change in regional government quality 2010-2017       | 190 | 0.00241 | 0.403    | -1.127 | 1.203  |
| Regional autonomy 2016                                | 200 | 14.71   | 7.569    | 1      | 27     |
| Average temperature 2019                              | 202 | 11.38   | 3.242    | 0.538  | 20.01  |
| Average precipitation 2019                            | 202 | 2.010   | 0.777    | 0.223  | 4.933  |
| Generalised trust 2016                                | 171 | -0.0352 | 0.381    | -1.507 | 0.635  |
| Bridging networks 2016                                | 171 | 0.0230  | 0.369    | -0.885 | 1.843  |
| National government effectiveness 2018                | 211 | 1.199   | 0.544    | 0.112  | 2.040  |
| Change in national government effectiveness 1998-2018 | 211 | -0.173  | 0.352    | -0.670 | 1      |
| Share of population over 65 2019                      | 210 | 0.238   | 0.042    | 0.031  | 0.343  |
| Share of population over 75 2019                      | 210 | 0.131   | 0.030    | 0.014  | 0.216  |
| Population 2019                                       | 211 | 14.24   | 0.961    | 10.30  | 16.70  |
| Population density 2018                               | 211 | 4.935   | 1.277    | 1.224  | 8.919  |
| Air passengers 2018                                   | 211 | 5.814   | 3.928    | 0      | 11.56  |
| GDP 2018                                              | 197 | 10.57   | 1.182    | 7.219  | 13.51  |
| GDP per capita 2018                                   | 197 | 10.11   | 0.586    | 8.294  | 11.50  |
| Accessibility by road 2014                            | 202 | 14.50   | 0.905    | 11.53  | 15.97  |
| Total household carbon footprint 2010 (ln)            | 173 | 23.79   | 1.123    | 19.91  | 26.21  |
| Average household carbon footprint 2010 (ln)          | 173 | 9.249   | 0.267    | 8.605  | 9.993  |
| Doctors per capita 2017                               | 178 | -5.627  | 0.309    | -7.211 | -4.846 |
| Hospital beds per capita 2017                         | 184 | -5.360  | 0.449    | -6.613 | -4.353 |
| Air pollution 2016                                    | 195 | 2.400   | 0.431    | 0.788  | 3.411  |
| Frequency of meeting friends 2016                     | 168 | 63.35   | 14.21    | 16     | 91.54  |

## Appendix C

**Table C1.** Excess mortality (per 100,000 inhabitants) and agglomeration, regional wealth, density, accessibility and connectivity

| <i>Dependent variable:</i>                       | (1)                  | (2)                  | (3)                    | (4)              | (5)                                     | (6)                  | (7)                  |
|--------------------------------------------------|----------------------|----------------------|------------------------|------------------|-----------------------------------------|----------------------|----------------------|
| Excess mortality in the first six months of 2020 | <i>Agglomeration</i> |                      | <i>Regional wealth</i> | <i>Density</i>   | <i>Accessibility &amp; connectivity</i> |                      |                      |
|                                                  | OLS                  | OLS                  | OLS                    | OLS              | OLS                                     | OLS                  | OLS                  |
| Population 2019 (ln)                             | 8.374*<br>(4.917)    |                      |                        |                  |                                         |                      |                      |
| GDP 2018 (ln)                                    |                      | 11.325***<br>(4.257) |                        |                  |                                         |                      |                      |
| GDP per capita 2018 (ln)                         |                      |                      | 53.214***<br>(13.161)  |                  |                                         |                      |                      |
| Population density 2018 (ln)                     |                      |                      |                        | 5.198<br>(3.577) |                                         |                      |                      |
| Air passengers 2018 (ln)                         |                      |                      |                        |                  | 0.675<br>(1.004)                        |                      | -0.271<br>(0.868)    |
| Accessibility by road 2014 (ln)                  |                      |                      |                        |                  |                                         | 31.740***<br>(6.279) | 32.056***<br>(6.271) |
| Country fixed effects                            | Yes                  | Yes                  | Yes                    | Yes              | Yes                                     | Yes                  | Yes                  |
| No. of regions                                   | 206                  | 192                  | 192                    | 206              | 206                                     | 201                  | 201                  |
| R <sup>2</sup>                                   | 0.435                | 0.459                | 0.487                  | 0.427            | 0.418                                   | 0.536                | 0.536                |
| Adjusted R <sup>2</sup>                          | 0.364                | 0.392                | 0.423                  | 0.355            | 0.344                                   | 0.476                | 0.473                |

Robust standard errors in parentheses

\*\*\* p<0.01, \*\* p<0.05, \* p<0.1

**Table C2.** Excess mortality (per 100,000 inhabitants) and age structure, education, readiness of the health system, and environmental conditions

| <i>Dependent variable:</i>                       | (1)                  | (2)                 | (3)                  | (4)                 | (5)                | (6)                | (7)                  | (8)                | (9)               | (10)                   | (11)                 | (12)             | (13)                 |  |
|--------------------------------------------------|----------------------|---------------------|----------------------|---------------------|--------------------|--------------------|----------------------|--------------------|-------------------|------------------------|----------------------|------------------|----------------------|--|
| Excess mortality in the first six months of 2020 | <i>Age structure</i> |                     |                      | <i>Education</i>    |                    |                    | <i>Health system</i> |                    |                   | <i>Air pollution</i>   |                      |                  | <i>Climate</i>       |  |
|                                                  | OLS                  | OLS                 | OLS                  | OLS                 | OLS                | OLS                | OLS                  | OLS                | OLS               | OLS                    | OLS                  | OLS              | OLS                  |  |
| Median population age 2019                       | -0.841<br>(0.888)    |                     |                      |                     |                    |                    |                      |                    |                   |                        |                      |                  |                      |  |
| Share of population over 65 2019                 |                      | -67.948<br>(87.268) |                      |                     |                    |                    |                      |                    |                   |                        |                      |                  |                      |  |
| Share of population over 75 2019                 |                      |                     | -32.756<br>(146.703) |                     |                    |                    |                      |                    |                   |                        |                      |                  |                      |  |
| Share of adults with higher education 2017       |                      |                     |                      | 0.949***<br>(0.300) |                    |                    |                      |                    |                   |                        |                      |                  |                      |  |
| Doctors per capita 2017 (ln)                     |                      |                     |                      |                     | -0.191<br>(12.512) |                    | -4.609<br>(17.958)   |                    |                   |                        |                      |                  |                      |  |
| Hospital beds per capita 2017 (ln)               |                      |                     |                      |                     |                    | 10.279<br>(13.877) | 6.108<br>(14.253)    |                    |                   |                        |                      |                  |                      |  |
| Air pollution 2016 (ln)                          |                      |                     |                      |                     |                    |                    |                      | 34.298<br>(23.723) |                   |                        |                      |                  |                      |  |
| Total household carbon footprint 2010 (ln)       |                      |                     |                      |                     |                    |                    |                      |                    | 9.762*<br>(5.402) |                        |                      |                  |                      |  |
| Average household carbon footprint 2010 (ln)     |                      |                     |                      |                     |                    |                    |                      |                    |                   | 120.039***<br>(30.520) |                      |                  |                      |  |
| Average temperature 2019                         |                      |                     |                      |                     |                    |                    |                      |                    |                   |                        | -7.205***<br>(1.692) |                  | -7.712***<br>(1.965) |  |
| Average Precipitation 2019                       |                      |                     |                      |                     |                    |                    |                      |                    |                   |                        |                      | 5.940<br>(6.240) | -3.502<br>(6.766)    |  |
| Country fixed effects                            | Yes                  | Yes                 | Yes                  | Yes                 | Yes                | Yes                | Yes                  | Yes                | Yes               | Yes                    | Yes                  | Yes              | Yes                  |  |
| No. of regions                                   | 206                  | 205                 | 205                  | 204                 | 174                | 180                | 162                  | 195                | 172               | 172                    | 197                  | 197              | 197                  |  |
| R <sup>2</sup>                                   | 0.419                | 0.421               | 0.418                | 0.438               | 0.351              | 0.354              | 0.355                | 0.410              | 0.454             | 0.501                  | 0.487                | 0.437            | 0.488                |  |
| Adjusted R <sup>2</sup>                          | 0.345                | 0.347               | 0.345                | 0.366               | 0.271              | 0.268              | 0.269                | 0.335              | 0.386             | 0.439                  | 0.418                | 0.362            | 0.416                |  |

Robust standard errors in parentheses

\*\*\* p<0.01, \*\* p<0.05, \* p<0.1

**Table C3.** Excess mortality (per 100,000 inhabitants) and institutional variables

| <i>Dependent variable:</i>                              | (1)                  | (2)                       | (3)                    | (4)                    | (5)                               | (6)               | (7)                   |
|---------------------------------------------------------|----------------------|---------------------------|------------------------|------------------------|-----------------------------------|-------------------|-----------------------|
| Excess mortality in the first six months of 2020        | <b>Autonomy</b>      | <b>Government quality</b> |                        |                        | <b>Social capital &amp; trust</b> |                   |                       |
|                                                         |                      | <i>Regional</i>           | <i>National</i>        | <i>Both</i>            | <i>Interaction</i>                | <i>Trust</i>      | <i>Bridging</i>       |
|                                                         | OLS                  | OLS                       | OLS                    | OLS                    | OLS                               | OLS               | OLS                   |
| Regional autonomy 2016                                  | -1.602***<br>(0.472) |                           |                        |                        |                                   |                   |                       |
| Regional government quality 2017                        |                      | 23.135**<br>(10.008)      |                        | 12.302<br>(10.095)     |                                   |                   |                       |
| Change in regional government quality 2010-2017         |                      | 2.219<br>(12.788)         |                        | 11.086<br>(11.129)     |                                   |                   |                       |
| National government effectiveness 2018                  |                      |                           | 7.853<br>(5.884)       | -12.143<br>(19.033)    |                                   |                   |                       |
| Change in national government effectiveness 1998-2018   |                      |                           | -73.403***<br>(10.022) | -75.624***<br>(13.286) |                                   |                   |                       |
| Frequency of meeting friends (once a week or more) 2016 |                      |                           |                        |                        | -0.608<br>(0.428)                 |                   |                       |
| Generalised trust 2016                                  |                      |                           |                        |                        |                                   | 9.693<br>(13.067) |                       |
| Bridging social networks 2016                           |                      |                           |                        |                        |                                   |                   | -23.555***<br>(8.281) |
| Country fixed effects                                   | Yes                  | Yes                       | No                     | No                     | Yes                               | Yes               | Yes                   |
| No. of regions                                          | 200                  | 189                       | 206                    | 189                    | 168                               | 171               | 171                   |
| R <sup>2</sup>                                          | 0.421                | 0.458                     | 0.215                  | 0.257                  | 0.374                             | 0.430             | 0.443                 |
| Adjusted R <sup>2</sup>                                 | 0.349                | 0.386                     | 0.208                  | 0.241                  | 0.303                             | 0.366             | 0.381                 |

Robust standard errors in parentheses

\*\*\* p<0.01, \*\* p<0.05, \* p<0.1



**Table C4.** Full model (excess mortality per 100,000 inhabitants)

| <i>Dependent variable:</i>                              | (1)                   | (2)                  | (3)                    | (4)                    | (5)                    | (6)                    | (7)                     | (8)                   |
|---------------------------------------------------------|-----------------------|----------------------|------------------------|------------------------|------------------------|------------------------|-------------------------|-----------------------|
| Excess mortality in the first six months of 2020        | OLS                   | OLS                  | OLS                    | OLS                    | OLS                    | OLS                    | OLS                     | OLS                   |
| Population 2019 (ln)                                    | 1.342<br>(6.343)      | 4.646<br>(6.623)     | 4.905<br>(7.174)       | -4.848<br>(12.643)     | 8.528<br>(8.446)       | 4.692<br>(7.457)       | 2.983<br>(7.936)        | 5.362<br>(7.820)      |
| GDP per capita 2018 (ln)                                | 50.398***<br>(13.832) | 51.367**<br>(22.135) | 34.266**<br>(14.720)   | 29.579*<br>(15.712)    | 21.089<br>(14.943)     | 31.880*<br>(19.231)    | 68.920***<br>(17.827)   | 29.494*<br>(17.060)   |
| Population density 2018 (ln)                            | -4.953*<br>(2.648)    | 4.439<br>(4.918)     | -10.523**<br>(5.249)   | -7.550<br>(5.547)      | -14.599***<br>(5.366)  | -10.193*<br>(5.549)    | -5.566<br>(6.386)       | -10.176*<br>(5.336)   |
| Air passengers 2018 (ln)                                | -1.144<br>(1.224)     | -0.685<br>(1.171)    | -0.797<br>(1.480)      | -1.173<br>(1.779)      | -2.038<br>(1.715)      | -0.754<br>(1.534)      | -0.807<br>(1.690)       | -1.649<br>(1.627)     |
| Accessibility by road 2014 (ln)                         | 26.720***<br>(7.584)  | 23.103**<br>(9.292)  | 33.017***<br>(7.708)   | 25.290***<br>(8.310)   | 27.242***<br>(8.945)   | 35.208***<br>(11.785)  | 31.916***<br>(9.676)    | 43.868***<br>(11.644) |
| Share of population over 65 2019                        |                       | 12.673<br>(130.269)  | -24.944<br>(138.335)   | -90.140<br>(148.315)   | -238.215<br>(175.587)  | -30.201<br>(137.344)   | 136.903<br>(172.889)    | -30.822<br>(146.759)  |
| Share of adults with higher education 2017              |                       | -1.135*<br>(0.610)   | 0.790*<br>(0.475)      | 0.716<br>(0.508)       | 0.619<br>(0.448)       | 0.813<br>(0.513)       | 1.080*<br>(0.586)       | 1.237**<br>(0.522)    |
| Average temperature 2019                                |                       | -8.879***<br>(2.704) | -3.181*<br>(1.753)     | -4.364**<br>(2.074)    | 0.478<br>(2.464)       | -3.415*<br>(1.952)     | -3.651<br>(2.319)       | -4.536*<br>(2.328)    |
| Average Precipitation 2019                              |                       | -11.420*<br>(6.056)  | -11.374*<br>(6.316)    | -11.692*<br>(6.807)    | -7.795<br>(6.477)      | -11.471*<br>(6.360)    | -20.685***<br>(7.467)   | -13.893*<br>(7.053)   |
| Regional autonomy 2016                                  |                       |                      | -2.030***<br>(0.581)   | -1.583***<br>(0.590)   | -1.950***<br>(0.555)   | -1.925**<br>(0.743)    | -3.306**<br>(1.372)     | -1.302<br>(1.105)     |
| Frequency of meeting friends (once a week or more) 2016 |                       |                      | 1.288***<br>(0.338)    | 1.452***<br>(0.375)    | 0.832**<br>(0.381)     | 1.266***<br>(0.358)    | 1.209***<br>(0.414)     | 0.952**<br>(0.397)    |
| Change in regional government quality 2010-2017         |                       |                      | 22.870**<br>(10.044)   | 18.135*<br>(10.325)    | 12.011<br>(10.588)     | 22.361**<br>(10.654)   | 35.942***<br>(13.620)   | 20.650<br>(12.569)    |
| National government effectiveness 2018                  |                       |                      | -50.860***<br>(15.867) | -67.302***<br>(17.747) | -50.122***<br>(16.886) | -53.813***<br>(17.066) | -49.293***<br>(17.328)  | -43.006**<br>(17.662) |
| Change in national government effectiveness 1998-2018   |                       |                      | -89.800***<br>(15.631) | -84.726***<br>(15.409) | -60.969***<br>(16.630) | -86.337***<br>(19.322) | -148.191***<br>(49.623) | -75.650**<br>(33.344) |
| Generalised trust 2016                                  |                       |                      | 13.448                 | 27.418                 | -2.378                 | 12.434                 | -10.802                 | -2.221                |

|                                              |       |       |           |            |            |          |           |           |
|----------------------------------------------|-------|-------|-----------|------------|------------|----------|-----------|-----------|
| Bridging social networks 2016                |       |       | (17.574)  | (18.660)   | (19.275)   | (18.616) | (25.142)  | (18.823)  |
|                                              |       |       | -16.990** | -25.465*** | -24.951*** | -15.903* | -20.552*  | -14.842*  |
|                                              |       |       | (8.077)   | (8.909)    | (8.418)    | (9.120)  | (10.617)  | (8.254)   |
| Total household carbon footprint 2010 (ln)   |       |       |           | 14.799*    |            |          |           |           |
|                                              |       |       |           | (8.347)    |            |          |           |           |
| Average household carbon footprint 2010 (ln) |       |       |           |            | 114.223*** |          |           |           |
|                                              |       |       |           |            | (31.295)   |          |           |           |
| Air pollution 2016 (ln)                      |       |       |           |            |            | -7.970   |           |           |
|                                              |       |       |           |            |            | (30.594) |           |           |
| Doctors per capita 2017 (ln)                 |       |       |           |            |            |          | -34.584** |           |
|                                              |       |       |           |            |            |          | (15.458)  |           |
| Hospital beds per capita 2017 (ln)           |       |       |           |            |            |          |           | -33.916** |
|                                              |       |       |           |            |            |          |           | (14.127)  |
| Country fixed effects                        | Yes   | Yes   | No        | No         | No         | No       | No        | No        |
| No. of regions                               | 187   | 182   | 148       | 128        | 128        | 148      | 122       | 124       |
| R <sup>2</sup>                               | 0.578 | 0.635 | 0.459     | 0.492      | 0.525      | 0.460    | 0.457     | 0.472     |
| Adjusted R <sup>2</sup>                      | 0.513 | 0.565 | 0.393     | 0.414      | 0.451      | 0.389    | 0.368     | 0.387     |
| F test                                       |       |       | 8.897     | 7.801      | 10.19      | 8.504    | 5.385     | 6.762     |

Robust standard errors in parentheses

\*\*\* p<0.01, \*\* p<0.05, \* p<0.1

## Appendix D

**Table D1.** t-test on Pre-and Covid mortality rates at regional level (H<sub>0</sub>: pre\_covid\_pop=covid\_pop)

|                            | obs | Mean1 | Mean2 | dif | St_Err | t_value | p_value |
|----------------------------|-----|-------|-------|-----|--------|---------|---------|
| Abruzzo                    | 26  | 0     | 0     | 0   | 0      | -0.15   | 0.873   |
| Agder og Rogaland          | 27  | 0     | 0     | 0   | 0      | 0.55    | 0.581   |
| Alentejo                   | 27  | 0.001 | 0.001 | 0   | 0      | 0.1     | 0.921   |
| Algarve                    | 27  | 0     | 0     | 0   | 0      | -0.25   | 0.8     |
| Alsace                     | 27  | 0     | 0     | 0   | 0      | -2.55   | 0.017   |
| Andalucia                  | 27  | 0     | 0     | 0   | 0      | -0.3    | 0.782   |
| Aquitaine                  | 27  | 0     | 0     | 0   | 0      | 1.85    | 0.077   |
| Aragon                     | 27  | 0     | 0     | 0   | 0      | -1.7    | 0.105   |
| Auvergne                   | 27  | 0     | 0     | 0   | 0      | 2.9     | 0.008   |
| Baden-Wuttemberg           | 22  | 0     | 0     | 0   | 0      | -1.05   | 0.313   |
| Basilicata                 | 26  | 0     | 0     | 0   | 0      | 0.85    | 0.408   |
| Basse-Normandie            | 27  | 0     | 0     | 0   | 0      | 0       | 0.996   |
| Bayern                     | 22  | 0     | 0     | 0   | 0      | -1.5    | 0.142   |
| Berlin                     | 22  | 0     | 0     | 0   | 0      | -0.4    | 0.679   |
| Bourgogne                  | 27  | 0     | 0     | 0   | 0      | -1      | 0.328   |
| Brandenburg                | 22  | 0.001 | 0.001 | 0   | 0      | 0.05    | 0.943   |
| Bratislavský kraj          | 27  | 0     | 0     | 0   | 0      | 1.6     | 0.123   |
| Bremen                     | 22  | 0     | 0.001 | 0   | 0      | -4.9    | 0       |
| Bretagne                   | 27  | 0     | 0     | 0   | 0      | -0.3    | 0.762   |
| Budapest                   | 27  | 0     | 0     | 0   | 0      | 0.4     | 0.688   |
| Burgenland (AT)            | 27  | 0     | 0     | 0   | 0      | -0.05   | 0.963   |
| Calabria                   | 26  | 0     | 0     | 0   | 0      | 0.75    | 0.447   |
| Campania                   | 26  | 0     | 0     | 0   | 0      | 3       | 0.005   |
| Canarias (ES)              | 27  | 0     | 0     | 0   | 0      | -1.85   | 0.076   |
| Cantabria                  | 27  | 0     | 0     | 0   | 0      | -0.8    | 0.42    |
| Castilla y Leon            | 27  | 0     | 0.001 | 0   | 0      | -2.25   | 0.035   |
| Castilla-La Mancha         | 27  | 0     | 0.001 | 0   | 0      | -2.15   | 0.042   |
| Cataluna                   | 27  | 0     | 0     | 0   | 0      | -2.2    | 0.036   |
| Centre                     | 27  | 0     | 0     | 0   | 0      | -1.5    | 0.14    |
| Centro (PT)                | 27  | 0.001 | 0.001 | 0   | 0      | -0.6    | 0.545   |
| Champagne-Ardenne          | 27  | 0     | 0     | 0   | 0      | -1.3    | 0.199   |
| Ciudad Autonoma de Ceuta   | 27  | 0     | 0     | 0   | 0      | -2.2    | 0.036   |
| Ciudad Autonoma de Melilla | 27  | 0     | 0     | 0   | 0      | 0.9     | 0.365   |
| Comunidad Foral de Navarra | 27  | 0     | 0     | 0   | 0      | -1.95   | 0.063   |
| Comunidad Valenciana       | 27  | 0     | 0     | 0   | 0      | -1.8    | 0.085   |
| Comunidad de Madrid        | 27  | 0     | 0     | 0   | 0      | -2.4    | 0.024   |
| Corse                      | 27  | 0     | 0     | 0   | 0      | -0.85   | 0.416   |
| Dolnoslaskie               | 26  | 0     | 0     | 0   | 0      | -0.35   | 0.717   |
| Drenthe                    | 27  | 0     | 0     | 0   | 0      | -0.35   | 0.728   |
| De-Alfold                  | 27  | 0.001 | 0.001 | 0   | 0      | 3.9     | 0.001   |
| Dél-Dunántúl               | 27  | 0.001 | 0.001 | 0   | 0      | 2.7     | 0.011   |
| East Midlands (UK)         | 27  | 0     | 0     | 0   | 0      | -3.15   | 0.004   |
| East of England            | 27  | 0     | 0     | 0   | 0      | -2.55   | 0.017   |
| Emilia-Romagna             | 26  | 0     | 0.001 | 0   | 0      | -2.5    | 0.019   |
| Espace Mittelland          | 27  | 0     | 0     | 0   | 0      | 0.85    | 0.415   |
| Estonia                    | 27  | 0     | 0     | 0   | 0      | 0.7     | 0.477   |
| Etela-Suomi                | 27  | 0     | 0     | 0   | 0      | 0.75    | 0.468   |
| Extremadura                | 27  | 0     | 0     | 0   | 0      | -1.75   | 0.092   |
| Flevoland                  | 27  | 0     | 0     | 0   | 0      | -2      | 0.056   |
| Franche-Comté              | 27  | 0     | 0     | 0   | 0      | -1.85   | 0.077   |
| Friesland (NL)             | 27  | 0     | 0     | 0   | 0      | 0       | 0.998   |
| Friuli-Venezia Giulia      | 26  | 0     | 0     | 0   | 0      | -0.6    | 0.549   |
| Galicia                    | 27  | 0     | 0     | 0   | 0      | 0.7     | 0.504   |
| Gelderland                 | 27  | 0     | 0     | 0   | 0      | -2.1    | 0.044   |
| Groningen                  | 27  | 0     | 0     | 0   | 0      | 1.05    | 0.309   |
| Guadeloupe                 | 27  | 0     | 0     | 0   | 0      | -2.65   | 0.013   |
| Guyane                     | 27  | 0     | 0     | 0   | 0      | 0.85    | 0.396   |
| Hamburg                    | 22  | 0     | 0     | 0   | 0      | -4.3    | 0.001   |

|                      |    |       |       |   |   |       |       |
|----------------------|----|-------|-------|---|---|-------|-------|
| Haute-Normandie      | 27 | 0     | 0     | 0 | 0 | -1.2  | 0.24  |
| Hedmark og Oppland   | 27 | 0     | 0     | 0 | 0 | 2.2   | 0.038 |
| Helsinki-Uusimaa     | 27 | 0     | 0     | 0 | 0 | -3.55 | 0.002 |
| Hessen               | 22 | 0     | 0     | 0 | 0 | 0.55  | 0.593 |
| Hovedstaden          | 27 | 0     | 0     | 0 | 0 | 0.65  | 0.532 |
| Illes Balears        | 27 | 0     | 0     | 0 | 0 | 0.95  | 0.351 |
| Jihovýchod           | 27 | 0     | 0     | 0 | 0 | 0.65  | 0.51  |
| Jihozapad            | 27 | 0     | 0     | 0 | 0 | 0.2   | 0.827 |
| Kujawsko-Pomorskie   | 26 | 0     | 0     | 0 | 0 | -1.2  | 0.234 |
| Karnten              | 27 | 0     | 0     | 0 | 0 | 0.75  | 0.467 |
| Közép-Dunántúl       | 27 | 0.001 | 0.001 | 0 | 0 | 1     | 0.316 |
| La Rioja             | 27 | 0     | 0     | 0 | 0 | -2.1  | 0.043 |
| La Reunion           | 27 | 0     | 0     | 0 | 0 | -2.2  | 0.037 |
| Languedoc-Roussillon | 27 | 0     | 0     | 0 | 0 | -0.6  | 0.567 |
| Latvija              | 27 | 0.001 | 0.001 | 0 | 0 | 3     | 0.005 |
| Lazio                | 26 | 0     | 0     | 0 | 0 | 4.15  | 0.001 |
| Liguria              | 26 | 0.001 | 0.001 | 0 | 0 | -1.7  | 0.099 |
| Limburg (NL)         | 27 | 0     | 0.001 | 0 | 0 | -2.7  | 0.013 |
| Limousin             | 27 | 0.001 | 0.001 | 0 | 0 | 2.1   | 0.046 |
| Lombardia            | 26 | 0     | 0.001 | 0 | 0 | -2.75 | 0.011 |
| London               | 27 | 0     | 0     | 0 | 0 | -2.5  | 0.019 |
| Lorraine             | 27 | 0     | 0     | 0 | 0 | -1.95 | 0.06  |
| Lubelskie            | 26 | 0     | 0     | 0 | 0 | 0.95  | 0.344 |
| Lubuskie             | 26 | 0     | 0     | 0 | 0 | -0.1  | 0.94  |
| Luxembourg           | 26 | 0     | 0     | 0 | 0 | -0.55 | 0.597 |
| Lansi-Suomi          | 27 | 0     | 0     | 0 | 0 | 0.05  | 0.941 |
| Lodzkie              | 26 | 0.001 | 0     | 0 | 0 | 2     | 0.058 |
| Malopolskie          | 26 | 0     | 0     | 0 | 0 | -0.8  | 0.42  |
| Marche               | 26 | 0     | 0     | 0 | 0 | -1.95 | 0.06  |
| Martinique           | 27 | 0     | 0     | 0 | 0 | -1.05 | 0.3   |
| Mayotte              | 27 | 0     | 0     | 0 | 0 | -4.1  | 0.001 |
| Mazowiecki regiona   | 26 | 0     | 0     | 0 | 0 | -1.85 | 0.077 |
| Mecklenburg-Vorpom~n | 22 | 0.001 | 0.001 | 0 | 0 | 1.45  | 0.163 |
| Mellersta Norrland   | 27 | 0     | 0     | 0 | 0 | -2    | 0.054 |
| Midi-Pyrenees        | 27 | 0     | 0     | 0 | 0 | 1.65  | 0.113 |
| Midtjylland          | 27 | 0     | 0     | 0 | 0 | 0.75  | 0.471 |
| Molise               | 26 | 0     | 0     | 0 | 0 | 1.35  | 0.193 |
| Moravskoslezsko      | 27 | 0     | 0     | 0 | 0 | -1.1  | 0.276 |
| Niedersachsen        | 22 | 0     | 0     | 0 | 0 | 1.55  | 0.136 |
| Niederosterreich     | 27 | 0     | 0     | 0 | 0 | -1.6  | 0.128 |
| Noord-Brabant        | 27 | 0     | 0     | 0 | 0 | -2.35 | 0.028 |
| Noord-Holland        | 27 | 0     | 0     | 0 | 0 | -1.35 | 0.185 |
| Nord                 | 27 | 0     | 0     | 0 | 0 | 1.55  | 0.139 |
| Nord - Pas-de-Calais | 27 | 0     | 0     | 0 | 0 | -0.9  | 0.382 |
| Nordjylland          | 27 | 0     | 0     | 0 | 0 | 1.4   | 0.169 |
| Nordrhein-Westfalen  | 22 | 0     | 0     | 0 | 0 | 1.1   | 0.279 |
| Nordwestschweiz      | 27 | 0     | 0     | 0 | 0 | -0.05 | 0.972 |
| Norra Mellansverige  | 27 | 0     | 0     | 0 | 0 | -1.05 | 0.297 |
| Norte                | 27 | 0     | 0     | 0 | 0 | -2.7  | 0.012 |
| North East (UK)      | 27 | 0     | 0     | 0 | 0 | -2.6  | 0.016 |
| North West (UK)      | 27 | 0     | 0     | 0 | 0 | -2.9  | 0.007 |
| Northern Ireland     | 27 | 0     | 0     | 0 | 0 | -2.55 | 0.018 |
| Nyugat-Dunantul      | 27 | 0.001 | 0     | 0 | 0 | 1.65  | 0.112 |
| Oberosterreich       | 27 | 0     | 0     | 0 | 0 | -0.2  | 0.836 |
| Opolskie             | 26 | 0     | 0     | 0 | 0 | 0.6   | 0.556 |
| Oslo og Akershus     | 27 | 0     | 0     | 0 | 0 | 0.65  | 0.519 |
| Ostschweiz           | 27 | 0     | 0     | 0 | 0 | 0.3   | 0.757 |
| Overijssel           | 27 | 0     | 0     | 0 | 0 | -1.95 | 0.06  |
| Pays de la Loire     | 27 | 0     | 0     | 0 | 0 | -1.8  | 0.082 |
| Pais Vasco           | 27 | 0     | 0     | 0 | 0 | -1.8  | 0.085 |
| Pest                 | 27 | 0     | 0     | 0 | 0 | 2.15  | 0.041 |
| Picardie             | 27 | 0     | 0     | 0 | 0 | -2.7  | 0.013 |
| Piemonte             | 26 | 0     | 0.001 | 0 | 0 | -1.8  | 0.082 |
| Podkarpackie         | 26 | 0     | 0     | 0 | 0 | 0     | 0.984 |

|                                     |    |       |       |   |   |       |       |
|-------------------------------------|----|-------|-------|---|---|-------|-------|
| Podlaskie                           | 26 | 0     | 0     | 0 | 0 | 1.25  | 0.216 |
| Pohjois- ja Itä-Suomi               | 27 | 0     | 0     | 0 | 0 | 0.45  | 0.649 |
| Poitou-Charentes                    | 27 | 0     | 0     | 0 | 0 | 1.15  | 0.268 |
| Pomorskie                           | 26 | 0     | 0     | 0 | 0 | -1.4  | 0.18  |
| Praha                               | 27 | 0     | 0     | 0 | 0 | 0.55  | 0.575 |
| Principado de Asturias              | 27 | 0.001 | 0.001 | 0 | 0 | -1.1  | 0.282 |
| Provence-Alpes-Côte d'Azur          | 27 | 0     | 0     | 0 | 0 | -0.7  | 0.482 |
| Provincia Autonoma di Bolazano      | 26 | 0     | 0     | 0 | 0 | -2.8  | 0.009 |
| Provincia Autonoma di Trento        | 26 | 0     | 0     | 0 | 0 | -2.65 | 0.014 |
| Puglia                              | 26 | 0     | 0     | 0 | 0 | -1.45 | 0.164 |
| Region Juzne i Istocne Srbije       | 27 | 0     | 0     | 0 | 0 | 0.35  | 0.729 |
| Region Sumadije i Zapadne Srbije    | 27 | 0     | 0     | 0 | 0 | -0.1  | 0.923 |
| Region de Murcia                    | 27 | 0     | 0     | 0 | 0 | -1.05 | 0.296 |
| Rheinland-Pfalz                     | 22 | 0     | 0     | 0 | 0 | 2.9   | 0.009 |
| Rhone-Alpes                         | 27 | 0     | 0     | 0 | 0 | -2.15 | 0.043 |
| Region de Bruxelles                 | 27 | 0     | 0     | 0 | 0 | -1.95 | 0.061 |
| Region lemanique                    | 27 | 0     | 0     | 0 | 0 | -1.65 | 0.111 |
| Region wallonne                     | 27 | 0     | 0     | 0 | 0 | -1.5  | 0.144 |
| Saarland                            | 22 | 0.001 | 0.001 | 0 | 0 | 0.1   | 0.917 |
| Sachsen                             | 22 | 0.001 | 0.001 | 0 | 0 | 0.75  | 0.458 |
| Sachsen-Anhalt                      | 22 | 0.001 | 0.001 | 0 | 0 | 4.6   | 0     |
| Salzburg                            | 27 | 0     | 0     | 0 | 0 | -1.85 | 0.076 |
| Sardegna                            | 26 | 0     | 0     | 0 | 0 | -0.65 | 0.512 |
| Schleswig-Holstein                  | 22 | 0     | 0     | 0 | 0 | 4.7   | 0     |
| Scotland                            | 27 | 0     | 0     | 0 | 0 | -2.75 | 0.011 |
| Severen tsentralen                  | 27 | 0.001 | 0.001 | 0 | 0 | 3.35  | 0.003 |
| Severoiztochen                      | 27 | 0.001 | 0.001 | 0 | 0 | 3.1   | 0.004 |
| Severovýchod                        | 27 | 0     | 0     | 0 | 0 | 1.45  | 0.161 |
| Severozapaden                       | 27 | 0.001 | 0.001 | 0 | 0 | 3.85  | 0.001 |
| Severozapad                         | 27 | 0     | 0     | 0 | 0 | 0.5   | 0.629 |
| Sicilia                             | 26 | 0     | 0     | 0 | 0 | 2.65  | 0.013 |
| Sjælland                            | 27 | 0     | 0     | 0 | 0 | -1.5  | 0.146 |
| Slaskie                             | 26 | 0     | 0     | 0 | 0 | -0.95 | 0.354 |
| Smaland med oarna                   | 27 | 0     | 0     | 0 | 0 | -1.85 | 0.075 |
| Sostines regionas                   | 27 | 0     | 0     | 0 | 0 | 1.25  | 0.223 |
| South East (UK)                     | 27 | 0     | 0     | 0 | 0 | -2.8  | 0.009 |
| South West (UK)                     | 27 | 0     | 0     | 0 | 0 | -2.2  | 0.037 |
| Steiermark                          | 27 | 0     | 0     | 0 | 0 | -1.75 | 0.095 |
| Stockholm                           | 27 | 0     | 0     | 0 | 0 | -3.15 | 0.004 |
| Stredne Slovensko                   | 27 | 0     | 0     | 0 | 0 | 2.75  | 0.011 |
| Stredne Cechy                       | 27 | 0     | 0     | 0 | 0 | 1.3   | 0.212 |
| Stredne Morava                      | 27 | 0     | 0     | 0 | 0 | -0.15 | 0.893 |
| Swietokrzyskie                      | 26 | 0     | 0     | 0 | 0 | -0.75 | 0.447 |
| Syddanmark                          | 27 | 0     | 0     | 0 | 0 | 2.4   | 0.024 |
| Sydsverige                          | 27 | 0     | 0     | 0 | 0 | 0.45  | 0.641 |
| Sor                                 | 27 | 0     | 0     | 0 | 0 | 0.5   | 0.606 |
| Thuringen                           | 22 | 0.001 | 0.001 | 0 | 0 | 2.55  | 0.019 |
| Ticino                              | 27 | 0     | 0     | 0 | 0 | -2.15 | 0.041 |
| Tirol                               | 27 | 0     | 0     | 0 | 0 | -1.05 | 0.314 |
| Toscana                             | 26 | 0     | 0     | 0 | 0 | -0.25 | 0.816 |
| Trondelag                           | 27 | 0     | 0     | 0 | 0 | 1.3   | 0.205 |
| Umbria                              | 26 | 0     | 0     | 0 | 0 | 1.65  | 0.114 |
| Utrecht                             | 27 | 0     | 0     | 0 | 0 | -2.65 | 0.013 |
| Valle d'Aosta                       | 26 | 0     | 0.001 | 0 | 0 | -1.7  | 0.106 |
| Veneto                              | 26 | 0     | 0     | 0 | 0 | -2.55 | 0.017 |
| Vestlandet                          | 27 | 0     | 0     | 0 | 0 | 1.65  | 0.114 |
| Vidurio ir vakaru Lietuvos regionas | 27 | 0.001 | 0.001 | 0 | 0 | 2.7   | 0.012 |
| Vlaams Gewest                       | 27 | 0     | 0     | 0 | 0 | -1.85 | 0.075 |
| Vorarlberg                          | 27 | 0     | 0     | 0 | 0 | -0.35 | 0.742 |
| Vastsverige                         | 27 | 0     | 0     | 0 | 0 | -2.25 | 0.033 |
| Vychodné Slovensko                  | 27 | 0     | 0     | 0 | 0 | 1.8   | 0.081 |
| Wales                               | 27 | 0     | 0     | 0 | 0 | -2.55 | 0.017 |
| Warminsko-Mazurski                  | 26 | 0     | 0     | 0 | 0 | 1.6   | 0.119 |
| Warszawski stolecz                  | 26 | 0     | 0     | 0 | 0 | -0.9  | 0.374 |

|                              |    |       |       |   |   |       |       |
|------------------------------|----|-------|-------|---|---|-------|-------|
| West Midlands (UK)           | 27 | 0     | 0     | 0 | 0 | -2.8  | 0.009 |
| Wielkopolskie                | 26 | 0     | 0     | 0 | 0 | -0.15 | 0.866 |
| Wien                         | 27 | 0     | 0     | 0 | 0 | -2.45 | 0.022 |
| Yorkshire and The Humber     | 27 | 0     | 0     | 0 | 0 | -2.75 | 0.011 |
| Yugoiztochen                 | 27 | 0.001 | 0.001 | 0 | 0 | 2.6   | 0.015 |
| Yugozapaden                  | 27 | 0.001 | 0.001 | 0 | 0 | 2.85  | 0.008 |
| Yuzhen tsentralen            | 27 | 0.001 | 0.001 | 0 | 0 | 2.65  | 0.013 |
| Zachodniopomorskie           | 26 | 0     | 0     | 0 | 0 | -2.1  | 0.043 |
| Zeeland                      | 27 | 0     | 0     | 0 | 0 | -1.55 | 0.137 |
| Zentralschweiz               | 27 | 0     | 0     | 0 | 0 | 0.35  | 0.739 |
| Zuid-Holland                 | 27 | 0     | 0     | 0 | 0 | -1.6  | 0.117 |
| Zapadné Slovensko            | 27 | 0     | 0     | 0 | 0 | 2.35  | 0.028 |
| Zürich                       | 27 | 0     | 0     | 0 | 0 | 1.55  | 0.133 |
| Área Metropolitana de Lisboa | 27 | 0     | 0     | 0 | 0 | -1.8  | 0.083 |
| Aland                        | 27 | 0     | 0     | 0 | 0 | 0.7   | 0.484 |
| Eszak-Alfold                 | 27 | 0.001 | 0.001 | 0 | 0 | 2.55  | 0.017 |
| Eszak-Magyarország           | 27 | 0.001 | 0.001 | 0 | 0 | 6.2   | 0     |
| Ile de France                | 27 | 0     | 0     | 0 | 0 | -2.2  | 0.036 |
| Ostra Mellansverige          | 27 | 0     | 0     | 0 | 0 | -1.95 | 0.06  |
| Ovre Norrland                | 27 | 0     | 0     | 0 | 0 | -0.05 | 0.958 |

**Table D2.** Correlation among the stringency index and the quality of government.

| Variables                                                 | (1)    | (2)    | (3)    | (4)   |
|-----------------------------------------------------------|--------|--------|--------|-------|
| (1) Stringency Index                                      | 1.000  |        |        |       |
| (2) Regional government quality 2017                      | -0.362 | 1.000  |        |       |
| (3) National government effectiveness 2018                | -0.349 | 0.893  | 1.000  |       |
| (4) Change in national government effectiveness 1998-2018 | -0.313 | -0.101 | -0.055 | 1.000 |

**Table D3.** Interactions with regional government and RAI

| <i>Dependent variable:</i>                                             | (1)                   | (2)                   | (3)                   | (4)                    | (5)                   |
|------------------------------------------------------------------------|-----------------------|-----------------------|-----------------------|------------------------|-----------------------|
| Excess mortality in the first six months of 2020                       | OLS                   | OLS                   | OLS                   | OLS                    | OLS                   |
| Population 2019 (ln)                                                   | -0.762<br>(2.362)     | 1.378<br>(1.614)      | 0.926<br>(1.412)      | 0.691<br>(1.488)       | 0.953<br>(1.486)      |
| GDP per capita 2018 (ln)                                               | 8.048**<br>(3.083)    | 4.443<br>(3.042)      | 8.162**<br>(3.815)    | 15.971***<br>(3.655)   | 6.707*<br>(3.604)     |
| Population density 2018 (ln)                                           | -1.542<br>(1.152)     | -2.444**<br>(1.086)   | -1.945*<br>(1.099)    | -1.115<br>(1.289)      | -1.729<br>(1.078)     |
| Air passengers 2018 (ln)                                               | -0.286<br>(0.349)     | -0.409<br>(0.346)     | -0.182<br>(0.300)     | -0.145<br>(0.334)      | -0.318<br>(0.315)     |
| Accessibility by road 2014 (ln)                                        | 5.677***<br>(1.802)   | 5.308**<br>(2.157)    | 8.011***<br>(2.663)   | 7.205***<br>(2.225)    | 9.568***<br>(2.780)   |
| Share of population over 65 2019                                       | -36.409<br>(27.105)   | -69.195*<br>(35.172)  | -29.576<br>(25.394)   | 13.668<br>(30.280)     | -21.018<br>(26.244)   |
| Share of adults with higher education 2017                             | 0.152<br>(0.108)      | 0.098<br>(0.101)      | 0.168<br>(0.107)      | 0.184<br>(0.119)       | 0.246**<br>(0.109)    |
| Average temperature 2019                                               | -0.637<br>(0.408)     | 0.711<br>(0.475)      | -0.593<br>(0.409)     | -0.713<br>(0.448)      | -0.998**<br>(0.478)   |
| Average precipitation 2019                                             | -2.746**<br>(1.353)   | -0.829<br>(1.212)     | -2.855**<br>(1.313)   | -4.786***<br>(1.562)   | -3.442**<br>(1.480)   |
| Change in regional government quality 2010-2017                        | 6.944*<br>(3.988)     | 3.964<br>(4.268)      | 8.211**<br>(3.787)    | 15.143**<br>(5.812)    | 4.641<br>(4.392)      |
| Regional autonomy 2016                                                 | -0.396***<br>(0.112)  | -0.491***<br>(0.112)  | -0.429***<br>(0.149)  | -0.934***<br>(0.296)   | -0.390*<br>(0.215)    |
| Change in regional government quality 2010-2017*Regional autonomy 2016 | -0.256<br>(0.252)     | -0.148<br>(0.239)     | -0.299<br>(0.242)     | -0.474<br>(0.288)      | -0.075<br>(0.243)     |
| Frequency of meeting friends (once a week or more) 2016                | 0.225***<br>(0.069)   | 0.016<br>(0.069)      | 0.187***<br>(0.064)   | 0.175**<br>(0.079)     | 0.172**<br>(0.075)    |
| National government effectiveness 2018                                 | -11.984***<br>(3.645) |                       | -10.710***<br>(3.856) | -7.172**<br>(3.488)    | -7.609**<br>(3.562)   |
| Change in national government effectiveness 1998-2018                  | -17.349***<br>(2.907) | -15.399***<br>(3.199) | -16.534***<br>(3.729) | -36.745***<br>(11.158) | -18.153***<br>(6.860) |
| Generalised trust 2016                                                 | 5.294<br>(3.397)      | -5.321<br>(4.194)     | 2.039<br>(3.410)      | -2.928<br>(4.672)      | -0.676<br>(3.557)     |
| Bridging social networks 2016                                          | -5.373***<br>(1.955)  | -6.506***<br>(2.285)  | -3.275*<br>(1.859)    | -4.100*<br>(2.241)     | -2.811<br>(1.832)     |
| Total household carbon footprint 2010 (ln)                             | 2.692*<br>(1.616)     |                       |                       |                        |                       |
| Average household carbon footprint 2010 (ln)                           |                       | 22.306***<br>(7.206)  |                       |                        |                       |
| Air pollution 2016 (ln)                                                |                       |                       | -4.149<br>(6.741)     |                        |                       |
| Doctors per capita 2017 (ln)                                           |                       |                       |                       | -5.536*<br>(3.094)     |                       |
| Hospital beds per capita 2017 (ln)                                     |                       |                       |                       |                        | -6.809**<br>(3.113)   |
| Observations                                                           | 128                   | 128                   | 148                   | 122                    | 124                   |
| R-squared                                                              | 0.519                 | 0.503                 | 0.498                 | 0.486                  | 0.491                 |
| Adjusted R-squared                                                     | 0.440                 | 0.426                 | 0.427                 | 0.397                  | 0.404                 |

Clustered standard errors at country level in parentheses

\*\*\* p&lt;0.01, \*\* p&lt;0.05, \* p&lt;0.1



**Table D4.** Interactions with regional government and trust

| <i>Dependent variable:</i>                                                 | (1)                   | (2)                   | (3)                   | (4)                    | (5)                   |
|----------------------------------------------------------------------------|-----------------------|-----------------------|-----------------------|------------------------|-----------------------|
| Excess mortality in the first six months of 2020                           | OLS                   | OLS                   | OLS                   | OLS                    | OLS                   |
| Population 2019 (ln)                                                       | -0.792<br>(2.365)     | 1.346<br>(1.609)      | 0.920<br>(1.411)      | 0.741<br>(1.485)       | 0.918<br>(1.479)      |
| GDP per capita 2018 (ln)                                                   | 8.095**<br>(3.287)    | 4.764<br>(3.104)      | 7.983**<br>(3.887)    | 17.450***<br>(4.193)   | 7.345**<br>(3.637)    |
| Population density 2018 (ln)                                               | -1.451<br>(1.122)     | -2.506**<br>(1.102)   | -1.847*<br>(1.079)    | -0.928<br>(1.293)      | -1.743<br>(1.094)     |
| Air passengers 2018 (ln)                                                   | -0.275<br>(0.351)     | -0.415<br>(0.354)     | -0.172<br>(0.302)     | -0.161<br>(0.340)      | -0.325<br>(0.316)     |
| Accessibility by road 2014 (ln)                                            | 5.540***<br>(1.837)   | 5.254**<br>(2.221)    | 7.916***<br>(2.747)   | 6.667***<br>(2.156)    | 9.638***<br>(2.805)   |
| Share of population over 65 2019                                           | -34.958<br>(27.497)   | -69.352*<br>(35.419)  | -28.820<br>(25.553)   | 20.271<br>(33.103)     | -17.581<br>(26.822)   |
| Share of adults with higher education 2017                                 | 0.171<br>(0.106)      | 0.097<br>(0.097)      | 0.193*<br>(0.105)     | 0.227*<br>(0.120)      | 0.248**<br>(0.109)    |
| Average temperature 2019                                                   | -0.714*<br>(0.379)    | 0.776<br>(0.493)      | -0.677*<br>(0.387)    | -0.767*<br>(0.428)     | -1.008**<br>(0.467)   |
| Average precipitation 2019                                                 | -2.817**<br>(1.349)   | -0.844<br>(1.197)     | -2.906**<br>(1.318)   | -4.931***<br>(1.565)   | -3.506**<br>(1.464)   |
| Change in regional government quality 2010-2017                            | 2.345<br>(2.054)      | 0.662<br>(2.247)      | 3.069<br>(2.133)      | 5.562**<br>(2.464)     | 2.495<br>(2.393)      |
| Generalised trust 2016                                                     | 4.779<br>(3.343)      | -6.181<br>(3.892)     | 1.464<br>(3.397)      | -4.546<br>(4.523)      | -1.197<br>(3.355)     |
| Change in regional government quality 2010-2017*<br>Generalised trust 2016 | -3.627<br>(6.873)     | -8.175<br>(7.531)     | -2.200<br>(6.635)     | -13.194<br>(8.629)     | -8.465<br>(7.140)     |
| Regional autonomy 2016                                                     | -0.386***<br>(0.121)  | -0.508***<br>(0.122)  | -0.410***<br>(0.152)  | -0.896***<br>(0.310)   | -0.387*<br>(0.213)    |
| Frequency of meeting friends (once a week or more) 2016                    | 0.234***<br>(0.071)   | 0.002<br>(0.074)      | 0.196***<br>(0.066)   | 0.181**<br>(0.083)     | 0.163**<br>(0.076)    |
| National government effectiveness 2018                                     | -12.521***<br>(3.506) |                       | -11.288***<br>(3.880) | -7.611**<br>(3.341)    | -7.518**<br>(3.500)   |
| Change in national government effectiveness 1998-2018                      | -17.251***<br>(3.115) | -15.608***<br>(3.383) | -16.172***<br>(3.782) | -37.248***<br>(11.957) | -18.214***<br>(6.848) |
| Bridging social networks 2016                                              | -5.251***<br>(1.971)  | -6.477***<br>(2.308)  | -3.070<br>(1.867)     | -4.094*<br>(2.254)     | -2.895<br>(1.851)     |
| Total household carbon footprint 2010 (ln)                                 | 2.739*<br>(1.603)     |                       |                       |                        |                       |
| Average household carbon footprint 2010 (ln)                               |                       | 24.574***<br>(7.010)  |                       |                        |                       |
| Air pollution 2016 (ln)                                                    |                       |                       | -4.275<br>(6.829)     |                        |                       |
| Doctors per capita 2017 (ln)                                               |                       |                       |                       | -7.167**<br>(3.347)    |                       |
| Hospital beds per capita 2017 (ln)                                         |                       |                       |                       |                        | -7.265**<br>(3.151)   |
| Observations                                                               | 128                   | 128                   | 148                   | 122                    | 124                   |
| R-squared                                                                  | 0.517                 | 0.506                 | 0.494                 | 0.487                  | 0.495                 |
| Adjusted R-squared                                                         | 0.437                 | 0.429                 | 0.423                 | 0.398                  | 0.409                 |

Clustered standard errors at country level in parentheses

\*\*\* p&lt;0.01, \*\* p&lt;0.05, \* p&lt;0.1

**Table D5.** Excess mortality and agglomeration, regional wealth, density, accessibility and connectivity

| <i>Dependent variable:</i>                       | (1)                  | (2)      | (3)                    | (4)            | (5)     | (6)                                     | (7)        |
|--------------------------------------------------|----------------------|----------|------------------------|----------------|---------|-----------------------------------------|------------|
| Excess mortality in the first six months of 2020 |                      |          |                        |                |         |                                         |            |
|                                                  | <i>Agglomeration</i> |          | <i>Regional wealth</i> | <i>Density</i> |         | <i>Accessibility &amp; connectivity</i> |            |
|                                                  | OLS                  | OLS      | OLS                    | OLS            | OLS     | OLS                                     | OLS        |
| GDP 2018 (ln)                                    |                      | 2.163*   |                        |                |         |                                         |            |
|                                                  |                      | (1.175)  |                        |                |         |                                         |            |
| GDP 2018 (ln) - dummy                            |                      | 18.046   |                        |                |         |                                         |            |
|                                                  |                      | (12.314) |                        |                |         |                                         |            |
| Population 2019 (ln)                             | 1.588                |          |                        |                |         |                                         |            |
|                                                  | (1.186)              |          |                        |                |         |                                         |            |
| GDP per capita 2018 (ln)                         |                      |          | 10.243**               |                |         |                                         |            |
|                                                  |                      |          | (4.501)                |                |         |                                         |            |
| GDP per capita 2018 (ln) - dummy                 |                      |          | 104.581**              |                |         |                                         |            |
|                                                  |                      |          | (47.973)               |                |         |                                         |            |
| Population density 2018 (ln)                     |                      |          |                        | 1.960**        |         |                                         |            |
|                                                  |                      |          |                        | (0.876)        |         |                                         |            |
| Air passengers 2018 (ln)                         |                      |          |                        |                | 0.155   |                                         | -0.066     |
|                                                  |                      |          |                        |                | (0.212) |                                         | (0.176)    |
| Accessibility by road 2014 (ln)                  |                      |          |                        |                |         | 7.156***                                | 7.233***   |
|                                                  |                      |          |                        |                |         | (1.552)                                 | (1.541)    |
| Accessibility by road 2014 (ln) - dummy          |                      |          |                        |                |         | 110.800***                              | 111.981*** |
|                                                  |                      |          |                        |                |         | (24.249)                                | (24.227)   |
| Observations                                     | 206                  | 206      | 206                    | 206            | 206     | 206                                     | 206        |
| R-squared                                        | 0.367                | 0.387    | 0.411                  | 0.389          | 0.353   | 0.494                                   | 0.495      |
| Adjusted R-squared                               | 0.287                | 0.309    | 0.336                  | 0.312          | 0.271   | 0.427                                   | 0.425      |

Clustered standard errors at regional (NUTS2) level in parentheses.

\*\*\* p<0.01, \*\* p<0.05, \* p<0.1

**Table D6.** Excess mortality and age structure, education, readiness of the health system, and environmental conditions

| <i>Dependent variable:</i>                           | (1)                  | (2)      | (3)              | (4)                  | (5)      | (6)      | (7)                  | (8)      | (9)      | (10)           | (11)      | (12)    | (13)      |
|------------------------------------------------------|----------------------|----------|------------------|----------------------|----------|----------|----------------------|----------|----------|----------------|-----------|---------|-----------|
| Excess mortality in the first six months of 2020     | <i>Age structure</i> |          | <i>Education</i> | <i>Health system</i> |          |          | <i>Air pollution</i> |          |          | <i>Climate</i> |           |         |           |
|                                                      | OLS                  | OLS      | OLS              | OLS                  | OLS      | OLS      | OLS                  | OLS      | OLS      | OLS            | OLS       | OLS     | OLS       |
| Median population age 2019                           | -0.606*              |          |                  |                      |          |          |                      |          |          |                |           |         |           |
|                                                      | (0.337)              |          |                  |                      |          |          |                      |          |          |                |           |         |           |
| Share of population over 65 2019                     |                      | -50.631* |                  |                      |          |          |                      |          |          |                |           |         |           |
|                                                      |                      | (29.443) |                  |                      |          |          |                      |          |          |                |           |         |           |
| Share of population over 75 2019                     |                      |          | -63.008          |                      |          |          |                      |          |          |                |           |         |           |
|                                                      |                      |          | (46.960)         |                      |          |          |                      |          |          |                |           |         |           |
| Share of adults with higher education 2017           |                      |          |                  | 0.236***             |          |          |                      |          |          |                |           |         |           |
|                                                      |                      |          |                  | (0.075)              |          |          |                      |          |          |                |           |         |           |
| Doctors per capita 2017 (ln)                         |                      |          |                  |                      | -2.521   |          | -1.549               |          |          |                |           |         |           |
|                                                      |                      |          |                  |                      | (5.288)  |          | (3.952)              |          |          |                |           |         |           |
| Doctors per capita 2017 (ln) - dummy                 |                      |          |                  |                      | 8.902    |          | -2.800               |          |          |                |           |         |           |
|                                                      |                      |          |                  |                      | (32.235) |          | (23.641)             |          |          |                |           |         |           |
| Hospital beds per capita 2017 (ln)                   |                      |          |                  |                      |          | -2.373   | -3.407               |          |          |                |           |         |           |
|                                                      |                      |          |                  |                      |          | (5.542)  | (4.424)              |          |          |                |           |         |           |
| Hospital beds per capita 2017 (ln) - dummy           |                      |          |                  |                      |          | 17.604   | 28.177               |          |          |                |           |         |           |
|                                                      |                      |          |                  |                      |          | (29.857) | (25.096)             |          |          |                |           |         |           |
| Air pollution 2016 (ln)                              |                      |          |                  |                      |          |          |                      | 7.993    |          |                |           |         |           |
|                                                      |                      |          |                  |                      |          |          |                      | (4.990)  |          |                |           |         |           |
| Air pollution 2016 (ln) - dummy                      |                      |          |                  |                      |          |          |                      | 23.600*  |          |                |           |         |           |
|                                                      |                      |          |                  |                      |          |          |                      | (13.570) |          |                |           |         |           |
| Total household carbon footprint 2010 (ln)           |                      |          |                  |                      |          |          |                      |          | 1.726    |                |           |         |           |
|                                                      |                      |          |                  |                      |          |          |                      |          | (1.271)  |                |           |         |           |
| Total household carbon footprint 2010 (ln) - dummy   |                      |          |                  |                      |          |          |                      |          | 44.794   |                |           |         |           |
|                                                      |                      |          |                  |                      |          |          |                      |          | (29.328) |                |           |         |           |
| Average household carbon footprint 2010 (ln)         |                      |          |                  |                      |          |          |                      |          |          | 21.416***      |           |         |           |
|                                                      |                      |          |                  |                      |          |          |                      |          |          | (8.104)        |           |         |           |
| Average household carbon footprint 2010 (ln) - dummy |                      |          |                  |                      |          |          |                      |          |          | 206.099***     |           |         |           |
|                                                      |                      |          |                  |                      |          |          |                      |          |          | (76.096)       |           |         |           |
| Average temperature 2019                             |                      |          |                  |                      |          |          |                      |          |          |                | -1.164*** |         | -1.336*** |
|                                                      |                      |          |                  |                      |          |          |                      |          |          |                | (0.342)   |         | (0.388)   |
| Average temperature 2019 - dummy                     |                      |          |                  |                      |          |          |                      |          |          |                | -16.856** |         | -21.543** |
|                                                      |                      |          |                  |                      |          |          |                      |          |          |                | (7.733)   |         | (9.365)   |
| Average precipitation 2019                           |                      |          |                  |                      |          |          |                      |          |          |                |           | 0.515   | -1.182    |
|                                                      |                      |          |                  |                      |          |          |                      |          |          |                |           | (1.225) | (1.295)   |
| Average precipitation 2019 - dummy                   |                      |          |                  |                      |          |          |                      |          |          |                |           | 0.415   |           |
|                                                      |                      |          |                  |                      |          |          |                      |          |          |                |           | (5.749) |           |
| Observations                                         | 206                  | 205      | 205              | 204                  | 206      | 206      | 206                  | 206      | 206      | 206            | 206       | 206     | 206       |
| R-squared                                            | 0.386                | 0.382    | 0.370            | 0.400                | 0.359    | 0.357    | 0.375                | 0.379    | 0.367    | 0.400          | 0.385     | 0.351   | 0.388     |
| Adjusted R-squared                                   | 0.308                | 0.304    | 0.290            | 0.324                | 0.274    | 0.272    | 0.284                | 0.297    | 0.288    | 0.324          | 0.303     | 0.265   | 0.303     |

Clustered standard errors at regional (NUTS2) level in parentheses. \*\*\* p<0.01, \*\* p<0.05, \* p<0.1

**Table D7. Excess mortality and institutional variables**

| <i>Dependent variable:</i><br>Excess mortality in the first six months of 2020 | (1)<br><i>Autonomy</i> | (2)<br><i>Regional</i>    | (3)<br><i>National</i> | (4)<br><i>Both</i> | (5)<br><i>Interaction</i>         | (6)<br><i>Trust</i> | (7)<br><i>Bridging</i> |
|--------------------------------------------------------------------------------|------------------------|---------------------------|------------------------|--------------------|-----------------------------------|---------------------|------------------------|
|                                                                                |                        | <i>Government quality</i> |                        |                    | <i>Social capital &amp; trust</i> |                     |                        |
|                                                                                | OLS                    | OLS                       | OLS                    | OLS                | OLS                               | OLS                 | OLS                    |
| Regional government quality 2017                                               |                        | 3.859*                    |                        | 2.141              |                                   |                     |                        |
|                                                                                |                        | (2.198)                   |                        | (2.228)            |                                   |                     |                        |
| Regional government quality 2017 - dummy                                       |                        | 4.267                     |                        | 1.411              |                                   |                     |                        |
|                                                                                |                        | (14.331)                  |                        | (4.736)            |                                   |                     |                        |
| Change in regional government quality 2010-2017                                |                        | 1.634                     |                        | 2.660              |                                   |                     |                        |
|                                                                                |                        | (2.688)                   |                        | (2.403)            |                                   |                     |                        |
| Change in regional government quality 2010-2017 – dummy (omitted)              |                        | -                         |                        | -                  |                                   |                     |                        |
| Regional autonomy 2016                                                         | -0.363***              |                           |                        |                    |                                   |                     |                        |
|                                                                                | (0.108)                |                           |                        |                    |                                   |                     |                        |
| Regional autonomy 2016 - dummy                                                 | 1.218                  |                           |                        |                    |                                   |                     |                        |
|                                                                                | (7.560)                |                           |                        |                    |                                   |                     |                        |
| National government effectiveness 2018                                         |                        |                           | 1.475                  | -1.968             |                                   |                     |                        |
|                                                                                |                        |                           | (1.141)                | (4.057)            |                                   |                     |                        |
| Change in national government effectiveness 1998-2018                          |                        |                           | -13.398***             | -13.480***         |                                   |                     |                        |
|                                                                                |                        |                           | (2.121)                | (3.076)            |                                   |                     |                        |
| Frequency of meeting friends (once a week or more) 2016                        |                        |                           |                        |                    | -0.072                            |                     |                        |
|                                                                                |                        |                           |                        |                    | (0.074)                           |                     |                        |
| Frequency of meeting friends (once a week or more) 2016 - dummy                |                        |                           |                        |                    | -5.340                            |                     |                        |
|                                                                                |                        |                           |                        |                    | (3.705)                           |                     |                        |
| Generalised trust 2016                                                         |                        |                           |                        |                    |                                   | 3.231               |                        |
|                                                                                |                        |                           |                        |                    |                                   | (2.371)             |                        |
| Generalised trust 2016 - dummy                                                 |                        |                           |                        |                    |                                   | -1.941              |                        |
|                                                                                |                        |                           |                        |                    |                                   | (3.301)             |                        |
| Bridging social networks 2016                                                  |                        |                           |                        |                    |                                   |                     | -5.469***              |
|                                                                                |                        |                           |                        |                    |                                   |                     | (1.834)                |
| Bridging social networks 2016 - dummy                                          |                        |                           |                        |                    |                                   |                     | -1.303                 |
|                                                                                |                        |                           |                        |                    |                                   |                     | (3.270)                |
| Observations                                                                   | 206                    | 206                       | 206                    | 206                | 206                               | 206                 | 206                    |
| R-squared                                                                      | 0.360                  | 0.375                     | 0.167                  | 0.193              | 0.355                             | 0.355               | 0.368                  |
| Adjusted R-squared                                                             | 0.276                  | 0.289                     | 0.159                  | 0.173              | 0.269                             | 0.269               | 0.284                  |

Clustered standard errors at regional (NUTS2) level in parentheses.

\*\*\* p<0.01, \*\* p<0.05, \* p<0.1

**Table D8. Full model**

| <i>Dependent variable:</i>                                      | (1)                   | (2)                    | (3)                   | (4)                  | (5)                  | (6)                 | (7)                  | (8)                   |
|-----------------------------------------------------------------|-----------------------|------------------------|-----------------------|----------------------|----------------------|---------------------|----------------------|-----------------------|
| Excess mortality in the first six months of 2020                | OLS                   | OLS                    | OLS                   | OLS                  | OLS                  | OLS                 | OLS                  | OLS                   |
| Population 2019 (ln)                                            | -0.351<br>(1.237)     | 0.546<br>(1.205)       | 0.901<br>(1.217)      | -0.706<br>(1.914)    | 1.255<br>(1.242)     | 1.040<br>(1.257)    | 0.851<br>(1.205)     | 1.123<br>(1.166)      |
| GDP per capita 2018 (ln)                                        | 6.380<br>(4.226)      | 10.471***<br>(3.867)   | 5.444*<br>(2.787)     | 5.006*<br>(2.840)    | 3.010<br>(2.778)     | 6.242*<br>(3.511)   | 5.984**<br>(2.877)   | 3.721<br>(2.947)      |
| GDP per capita 2018 (ln) - dummy                                | 79.295*<br>(42.769)   | 114.804***<br>(41.027) | 64.238**<br>(28.886)  | 59.032**<br>(29.046) | 36.659<br>(28.102)   | 73.720*<br>(42.425) | 69.594**<br>(29.741) | 47.919*<br>(28.799)   |
| Population density 2018 (ln)                                    | 0.286<br>(0.799)      | 0.883<br>(0.764)       | -0.805<br>(0.902)     | -0.504<br>(0.970)    | -0.721<br>(0.894)    | -0.994<br>(1.012)   | -0.528<br>(0.926)    | -0.542<br>(0.834)     |
| Air passengers 2018 (ln)                                        | -0.181<br>(0.230)     | -0.113<br>(0.216)      | -0.174<br>(0.240)     | -0.145<br>(0.250)    | -0.235<br>(0.248)    | -0.181<br>(0.247)   | -0.132<br>(0.238)    | -0.173<br>(0.234)     |
| Accessibility by road 2014 (ln)                                 | 6.271***<br>(1.735)   | 5.432***<br>(1.843)    | 4.243***<br>(1.375)   | 3.963***<br>(1.314)  | 3.716***<br>(1.400)  | 4.192**<br>(2.119)  | 4.004***<br>(1.388)  | 4.749***<br>(1.796)   |
| Accessibility by road 2014 (ln) - dummy                         | 99.978***<br>(26.912) | 85.771***<br>(26.058)  | 46.713***<br>(17.054) | 40.879**<br>(16.804) | 44.968**<br>(17.457) | 34.262<br>(36.341)  | 42.962**<br>(17.370) | 55.008***<br>(20.837) |
| Share of population over 65 2019                                |                       | -15.505<br>(17.992)    | -8.501<br>(18.384)    | -11.919<br>(18.388)  | -10.557<br>(18.793)  | -14.811<br>(19.284) | -2.320<br>(18.556)   | 0.170<br>(17.728)     |
| Share of adults with higher education 2017                      |                       | -0.197*<br>(0.107)     | 0.121<br>(0.080)      | 0.109<br>(0.080)     | 0.112<br>(0.081)     | 0.125<br>(0.081)    | 0.122<br>(0.081)     | 0.114<br>(0.085)      |
| Average temperature 2019                                        |                       | -1.539***<br>(0.453)   | -0.311<br>(0.326)     | -0.329<br>(0.304)    | -0.082<br>(0.343)    | -0.272<br>(0.348)   | -0.343<br>(0.353)    | -0.493<br>(0.421)     |
| Average temperature 2019 - dummy                                |                       | -29.289***<br>(9.312)  | 10.997*<br>(5.596)    | 10.876*<br>(5.770)   | 15.193***<br>(5.631) | 13.042<br>(8.662)   | 10.308*<br>(5.908)   | 10.595**<br>(5.226)   |
| Average precipitation 2019                                      |                       | -1.550<br>(1.108)      | -0.731<br>(1.121)     | -0.767<br>(1.097)    | -0.611<br>(1.121)    | -0.687<br>(1.085)   | -0.738<br>(1.129)    | -0.606<br>(1.163)     |
| Average precipitation 2019 – dummy (omitted)                    |                       | -                      | -                     | -                    | -                    | -                   | -                    | -                     |
| Regional autonomy 2016                                          |                       |                        | -0.274***<br>(0.101)  | -0.234**<br>(0.104)  | -0.283***<br>(0.103) | -0.293**<br>(0.136) | -0.250**<br>(0.109)  | -0.160<br>(0.110)     |
| Regional autonomy 2016 - dummy                                  |                       |                        | 4.943<br>(3.289)      | 6.055*<br>(3.392)    | 1.013<br>(3.445)     | 4.474<br>(3.245)    | 5.354<br>(3.278)     | 2.224<br>(3.151)      |
| Frequency of meeting friends (once a week or more) 2016         |                       |                        | 0.180***<br>(0.055)   | 0.166***<br>(0.055)  | 0.143**<br>(0.059)   | 0.163***<br>(0.057) | 0.198***<br>(0.057)  | 0.111*<br>(0.058)     |
| Frequency of meeting friends (once a week or more) 2016 - dummy |                       |                        | 6.354*<br>(3.367)     | 5.906*<br>(3.426)    | 3.723<br>(3.338)     | 3.869<br>(3.348)    | 7.718**<br>(3.487)   | 2.117<br>(3.378)      |
| Change in regional government quality 2010-2017                 |                       |                        | 3.606**<br>(1.822)    | 3.459*<br>(1.814)    | 2.872<br>(1.845)     | 3.642**<br>(1.771)  | 3.362*<br>(1.853)    | 3.103*<br>(1.829)     |

|                                                         |            |            |            |            |            |           |
|---------------------------------------------------------|------------|------------|------------|------------|------------|-----------|
| Change in regional government quality 2010-2017 - dummy | -7.127*    | -7.861*    | -8.433**   | -9.533     | -6.033     | -11.937*  |
|                                                         | (3.616)    | (4.030)    | (3.582)    | (9.917)    | (4.615)    | (6.173)   |
| National government effectiveness 2018                  | -6.492**   | -7.564***  | -6.843**   | -6.057*    | -7.188**   | -4.208    |
|                                                         | (2.932)    | (2.864)    | (2.912)    | (3.246)    | (3.040)    | (2.666)   |
| Change in national government effectiveness 1998-2018   | -12.227*** | -12.082*** | -10.512*** | -13.597*** | -11.674*** | -8.834*** |
|                                                         | (2.674)    | (2.713)    | (2.558)    | (3.178)    | (2.850)    | (3.318)   |
| Generalised trust 2016                                  | 2.044      | 2.149      | 0.619      | 3.231      | 2.466      | -0.685    |
|                                                         | (2.207)    | (2.289)    | (2.739)    | (1.999)    | (2.221)    | (2.328)   |
| Generalised trust 2016 - dummy                          | 1.514      | 1.031      | 2.423      | 3.016      | 1.226      | 2.401     |
|                                                         | (3.227)    | (3.253)    | (3.161)    | (3.513)    | (3.242)    | (3.017)   |
| Bridging social networks 2016                           | -3.889**   | -4.346***  | -4.609***  | -4.239**   | -4.418***  | -4.550**  |
|                                                         | (1.600)    | (1.550)    | (1.631)    | (1.632)    | (1.562)    | (1.767)   |
| Bridging social networks 2016 – dummy (omitted)         | -          | -          | -          | -          | -          | -         |
| Total household carbon footprint 2010 (ln)              |            | 1.853      |            |            |            |           |
|                                                         |            | (1.409)    |            |            |            |           |
| Total household carbon footprint 2010 (ln) - dummy      |            | 46.076     |            |            |            |           |
|                                                         |            | (33.650)   |            |            |            |           |
| Average household carbon footprint 2010 (ln)            |            |            | 10.701**   |            |            |           |
|                                                         |            |            | (5.026)    |            |            |           |
| Average household carbon footprint 2010 (ln) - dummy    |            |            | 104.298**  |            |            |           |
|                                                         |            |            | (48.218)   |            |            |           |
| Average household carbon footprint 2010 (ln)            |            |            |            | 0.620      |            |           |
|                                                         |            |            |            | (5.221)    |            |           |
| Average household carbon footprint 2010 (ln) - dummy    |            |            |            | 12.009     |            |           |
|                                                         |            |            |            | (16.302)   |            |           |
| Doctors per capita 2017 (ln)                            |            |            |            |            | -3.512     |           |
|                                                         |            |            |            |            | (2.315)    |           |
| Doctors per capita 2017 (ln) - dummy                    |            |            |            |            | 19.601     |           |
|                                                         |            |            |            |            | (13.142)   |           |
| Hospital beds per capita 2017 (ln)                      |            |            |            |            |            | -5.742**  |
|                                                         |            |            |            |            |            | (2.337)   |
| Hospital beds per capita 2017 (ln) - dummy              |            |            |            |            |            | 33.215*** |
|                                                         |            |            |            |            |            | (11.197)  |
| Observations                                            | 206        | 203        | 203        | 203        | 203        | 203       |
| R-squared                                               | 0.516      | 0.610      | 0.430      | 0.439      | 0.446      | 0.447     |
| Adjusted R-squared                                      | 0.439      | 0.534      | 0.357      | 0.360      | 0.368      | 0.369     |

Clustered standard errors at regional (NUTS2) level in parentheses.

\*\*\* p<0.01, \*\* p<0.05, \* p<0.1

## APPENDIX E

Table E1. Year-on-year variation in mortality rates at regional level by regions.

### AUSTRIA

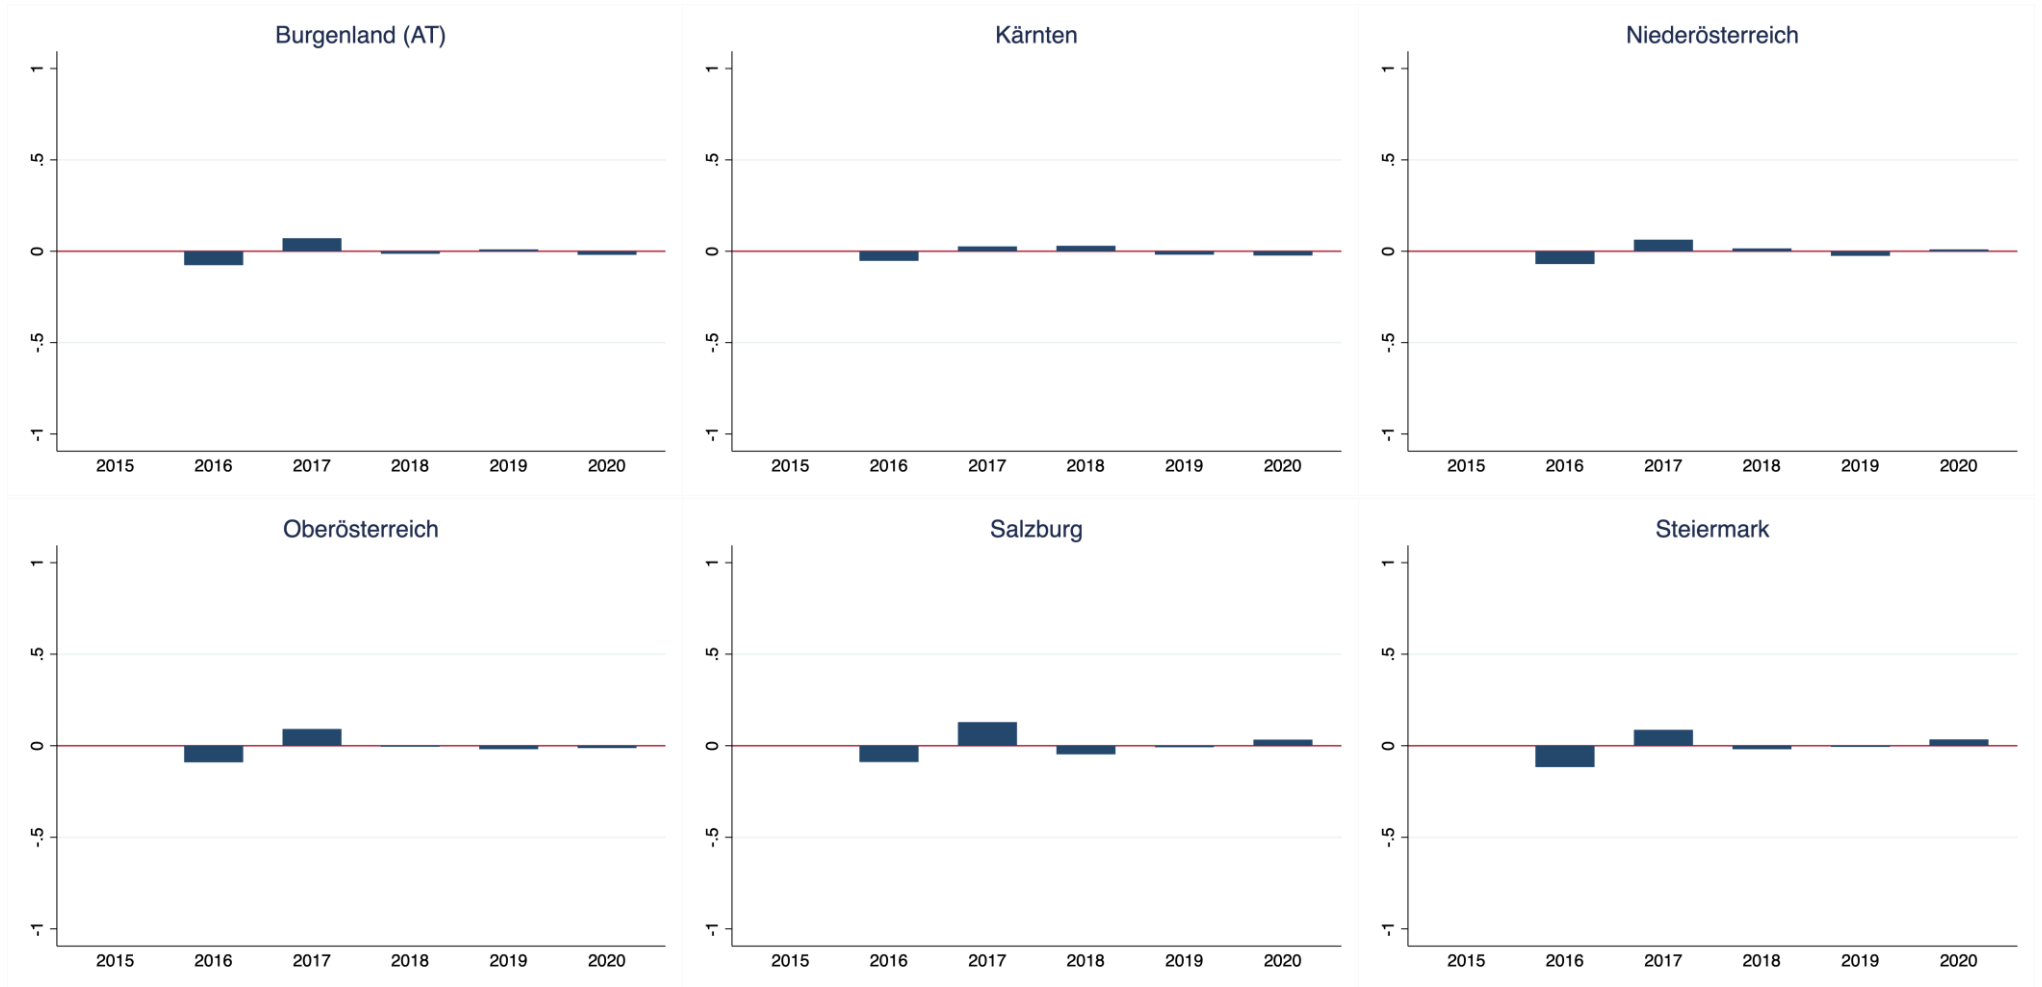

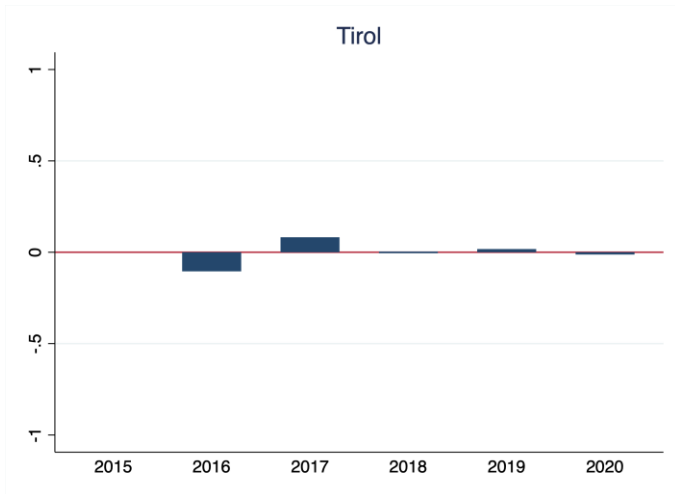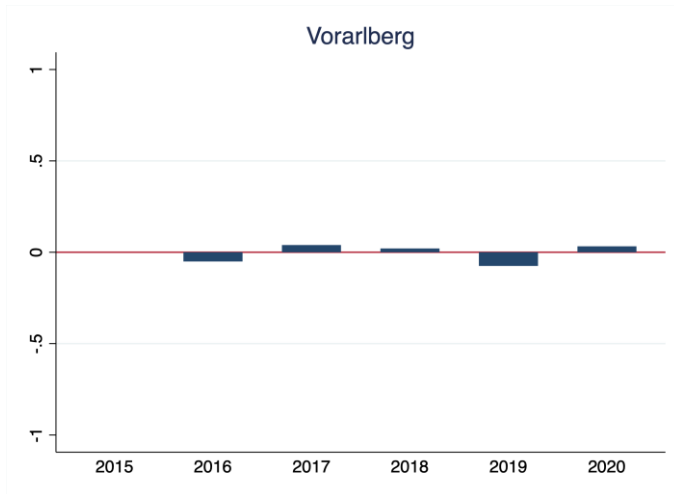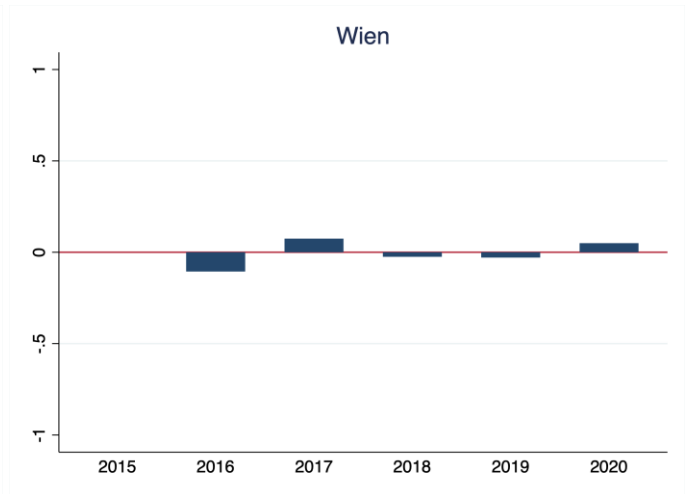

## BELGIUM

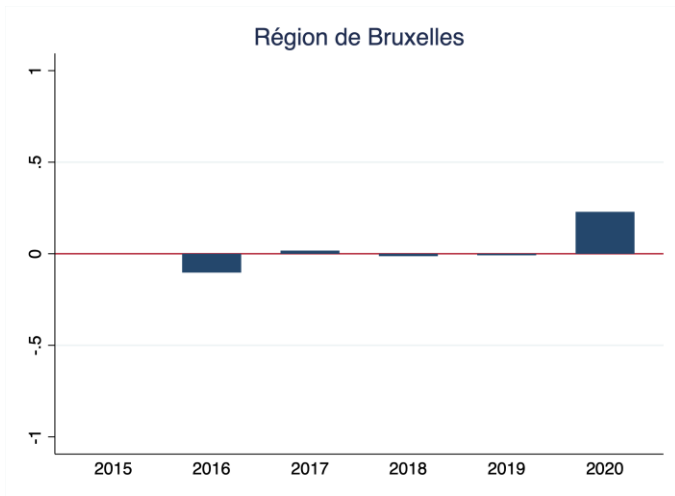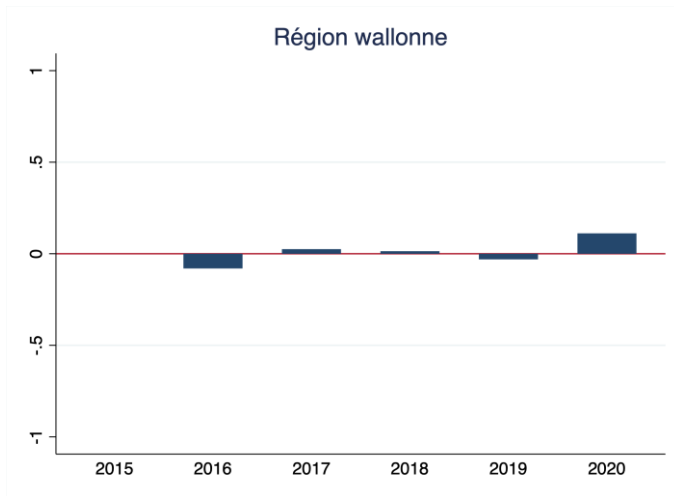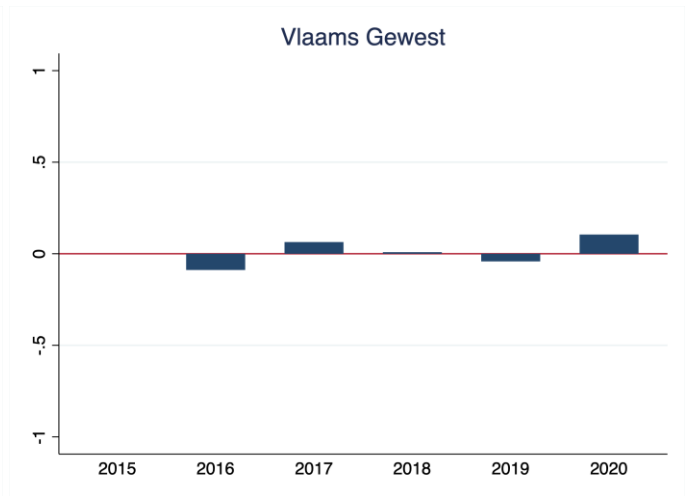



# BULGARIA

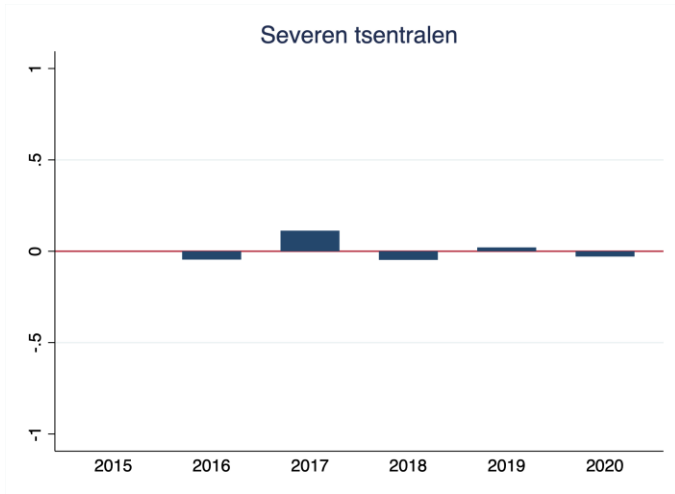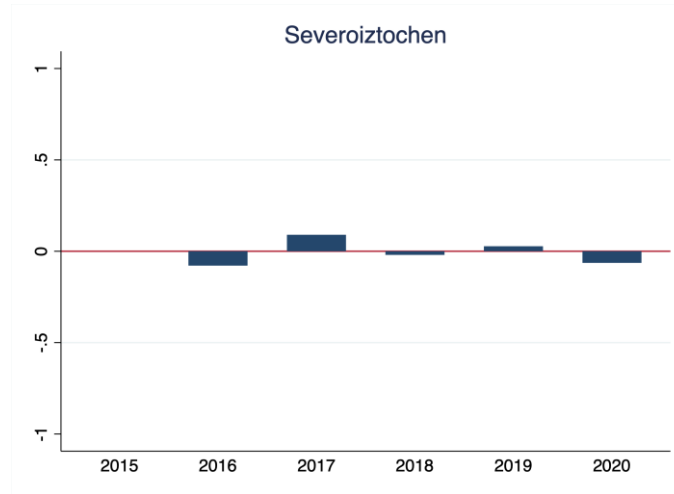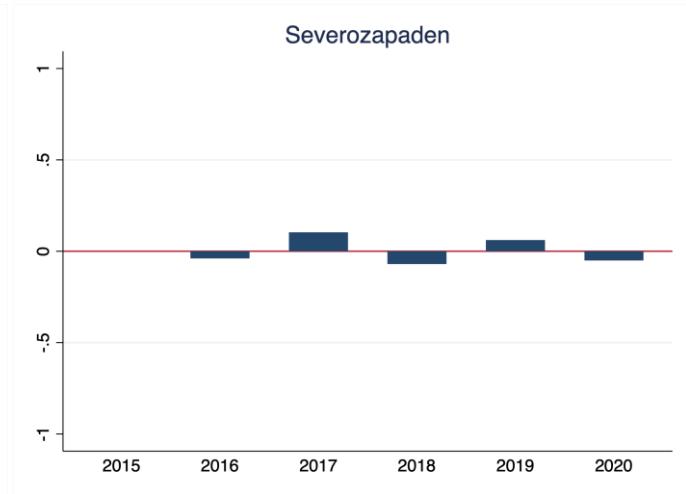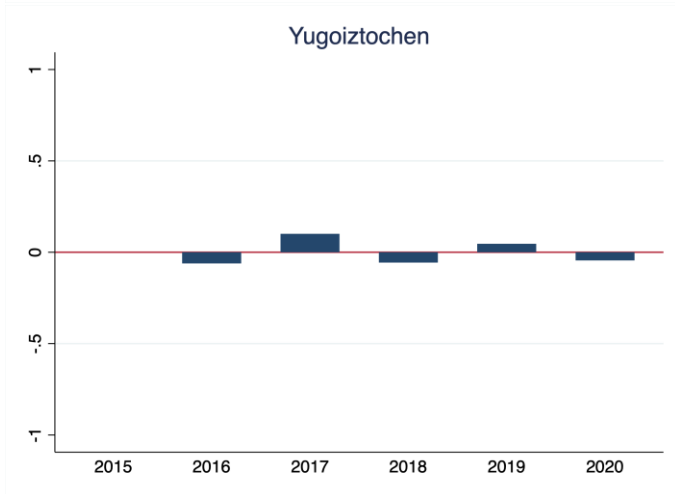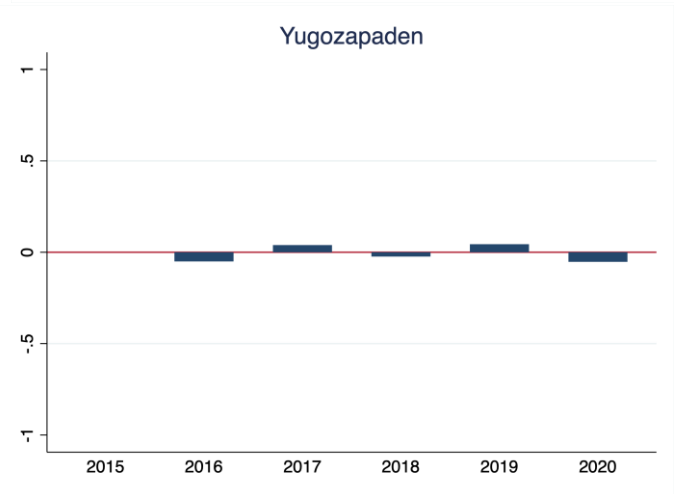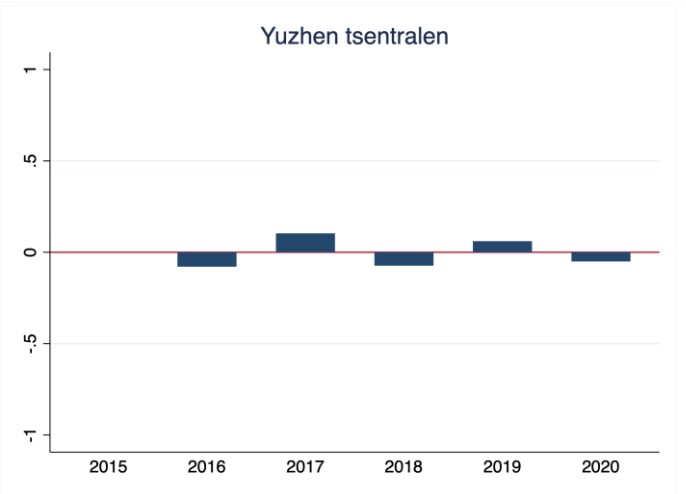

# CZECHIA

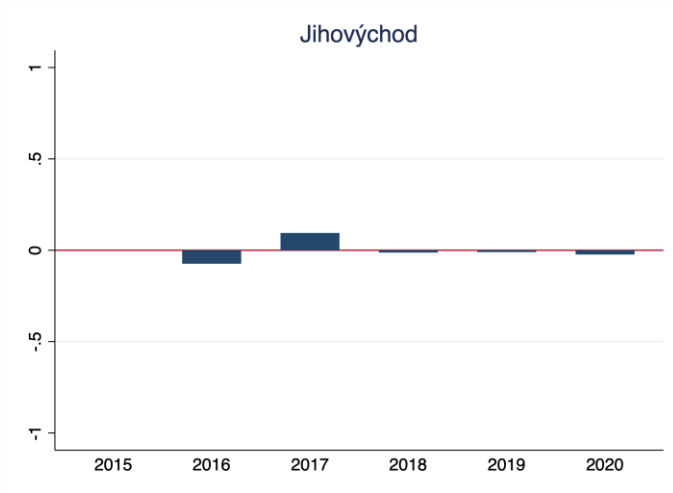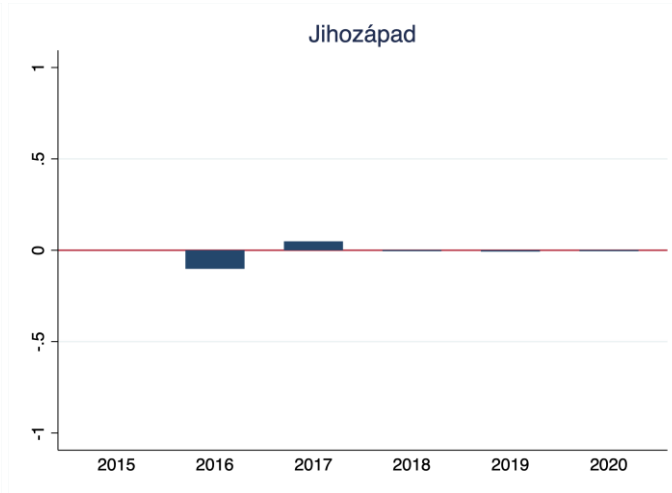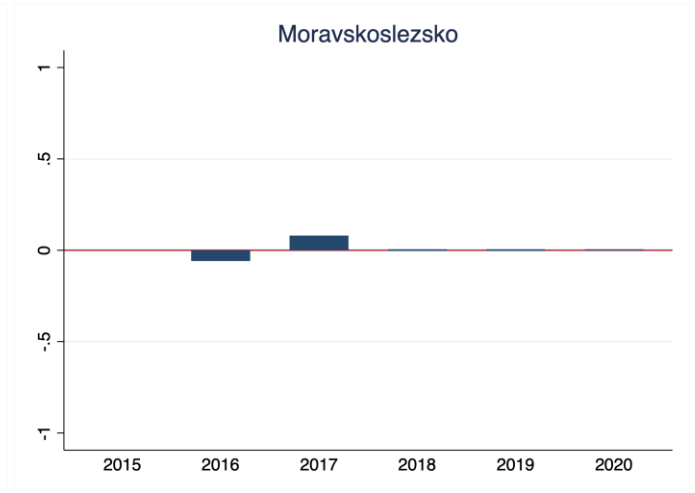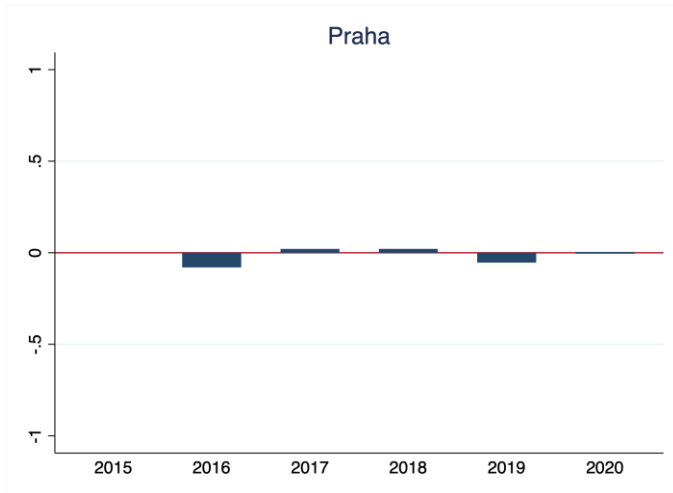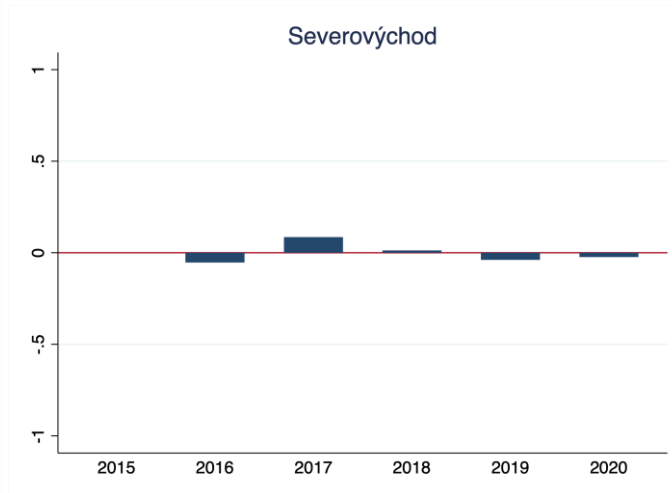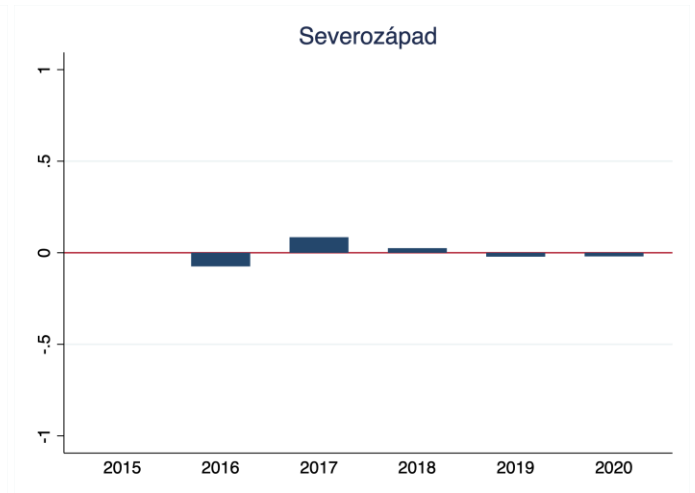

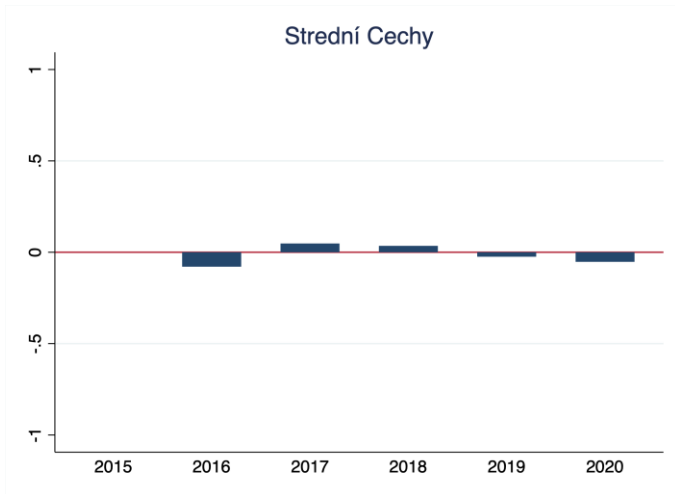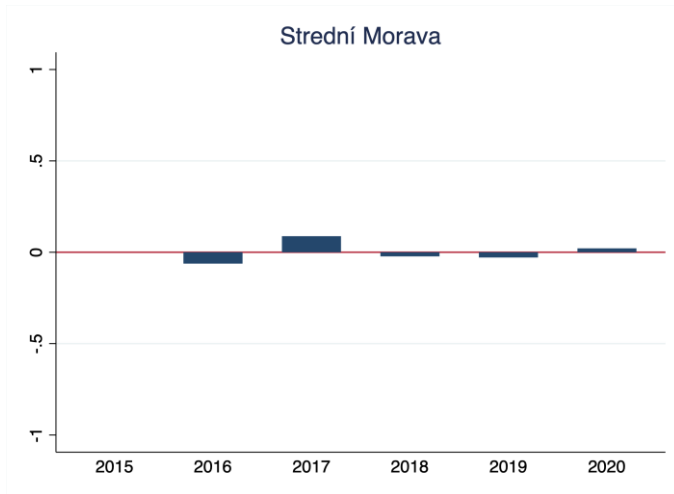

## GERMANY

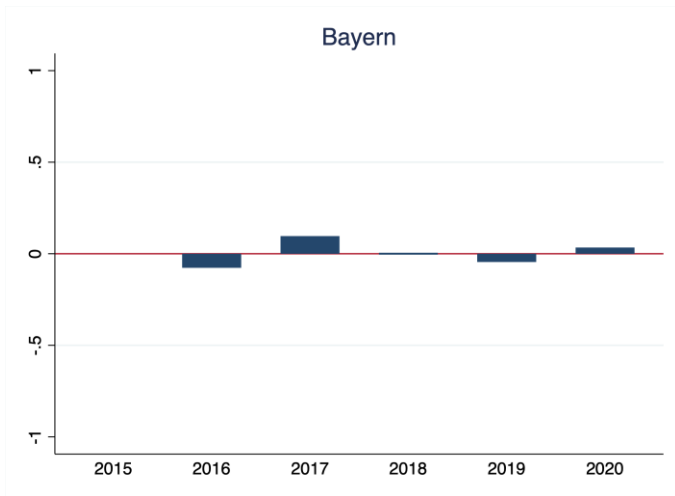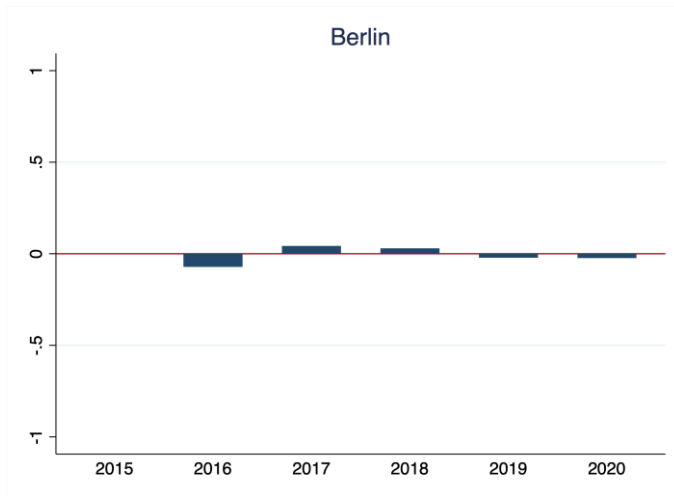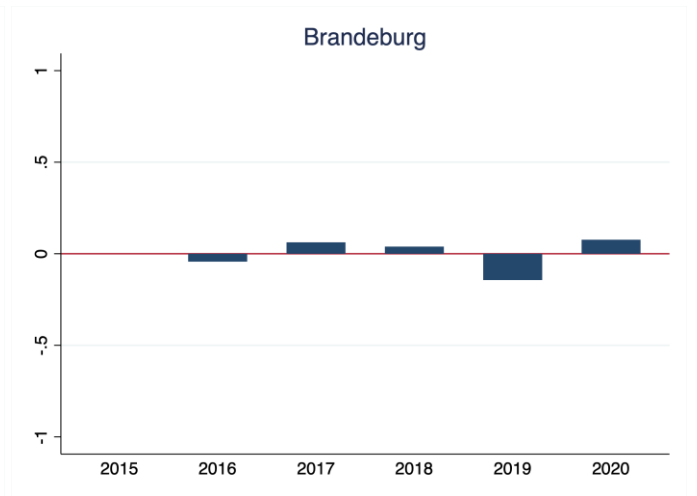

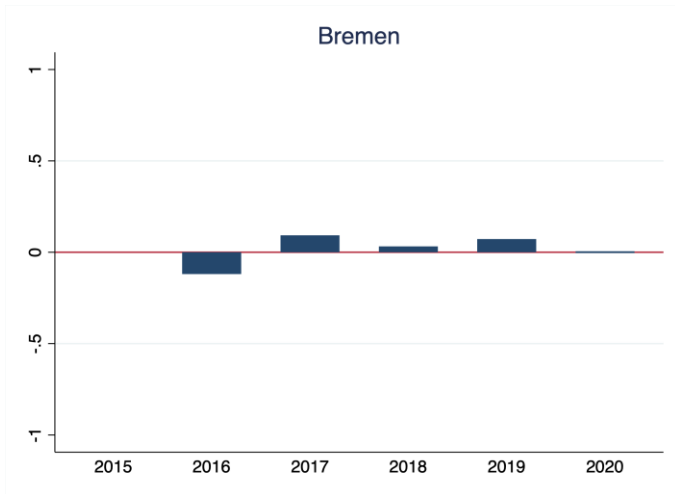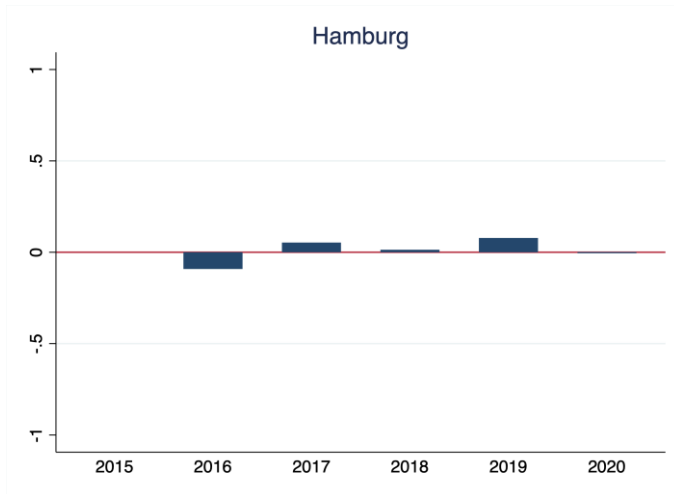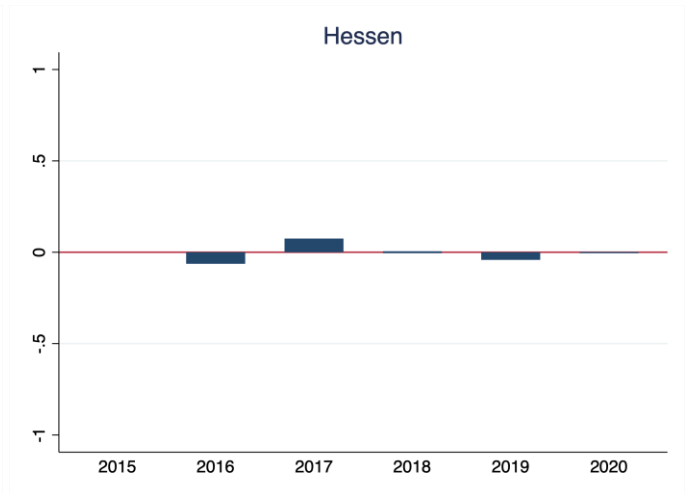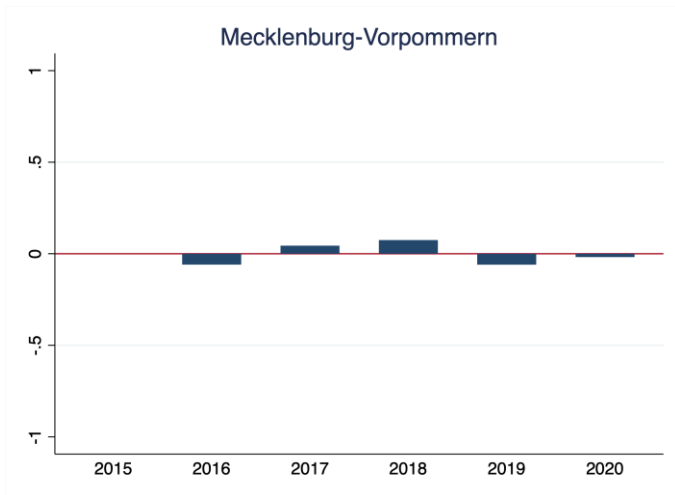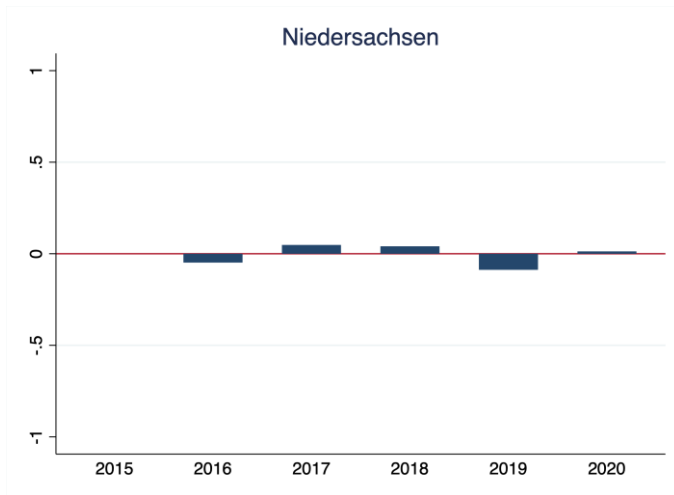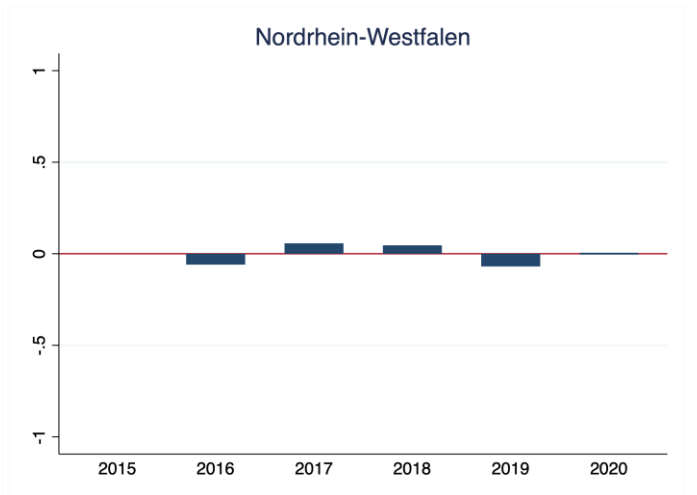

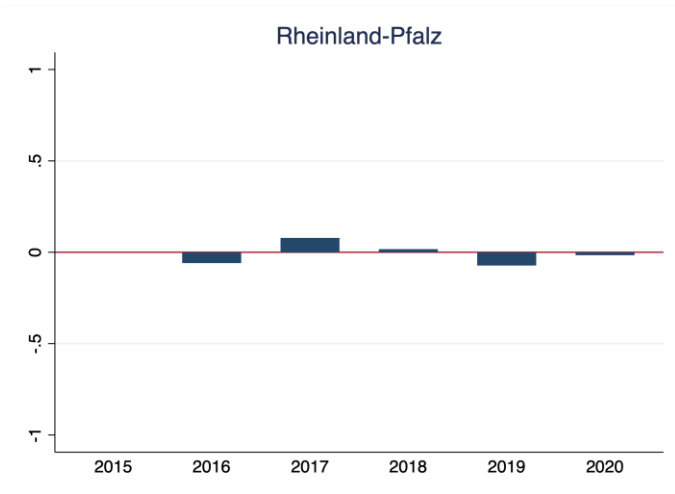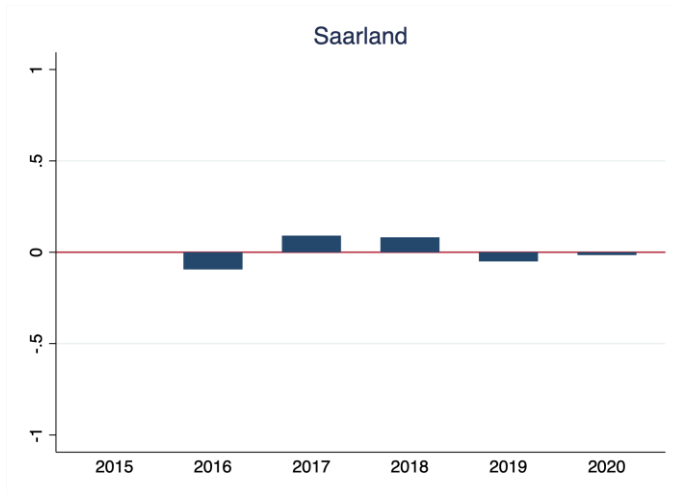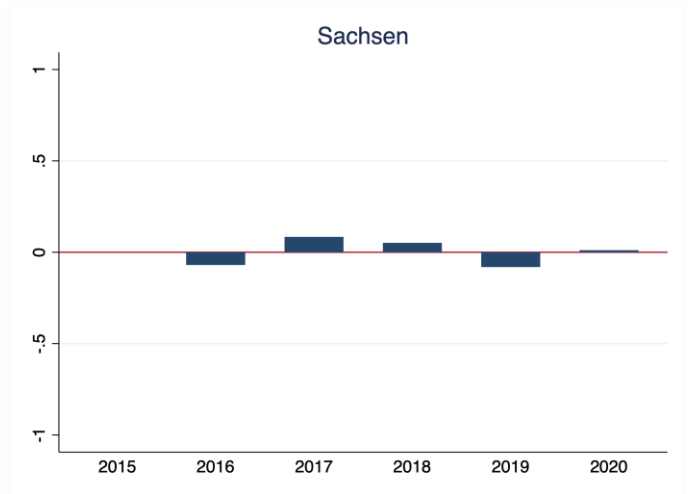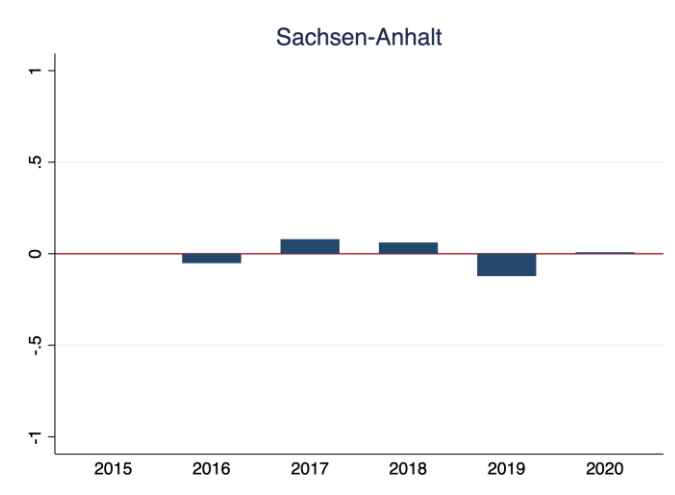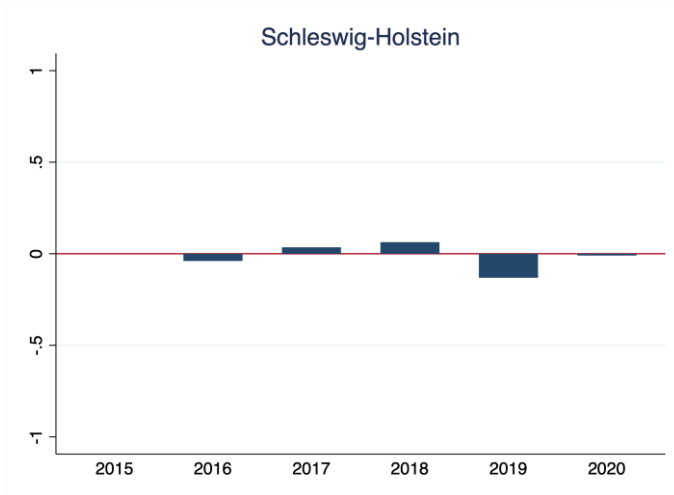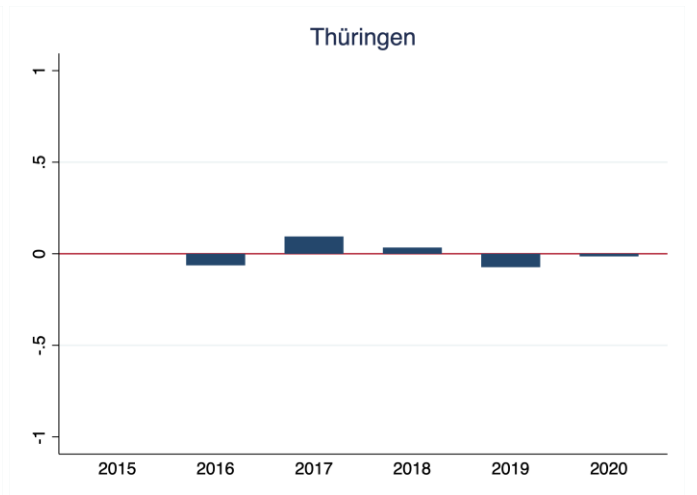

# DENMARK

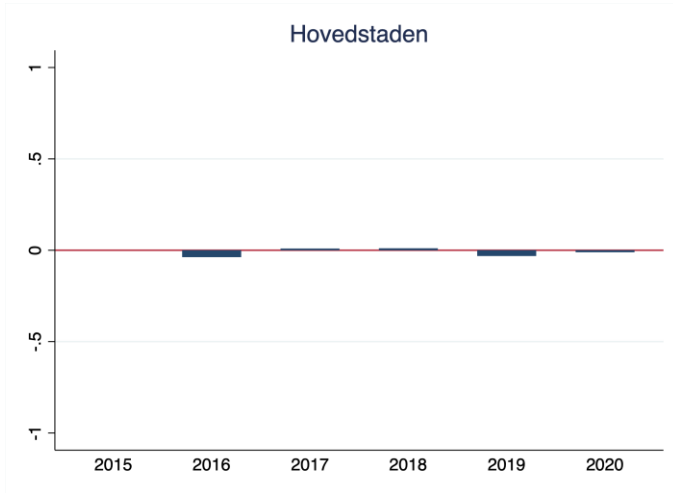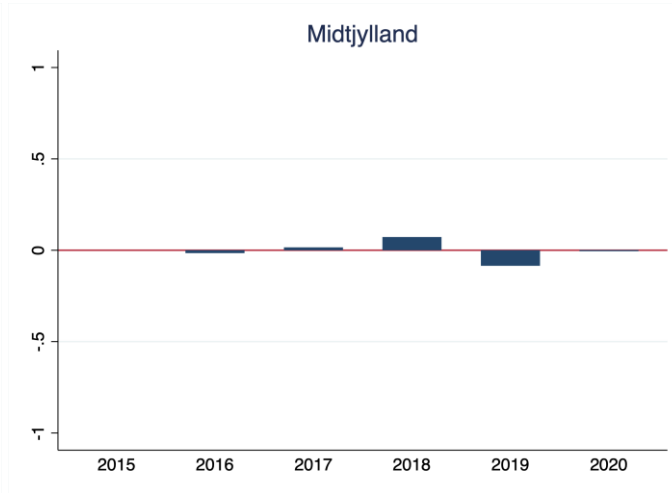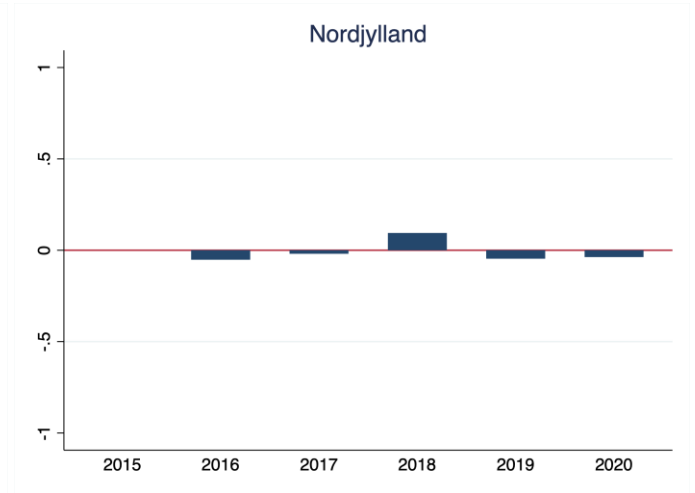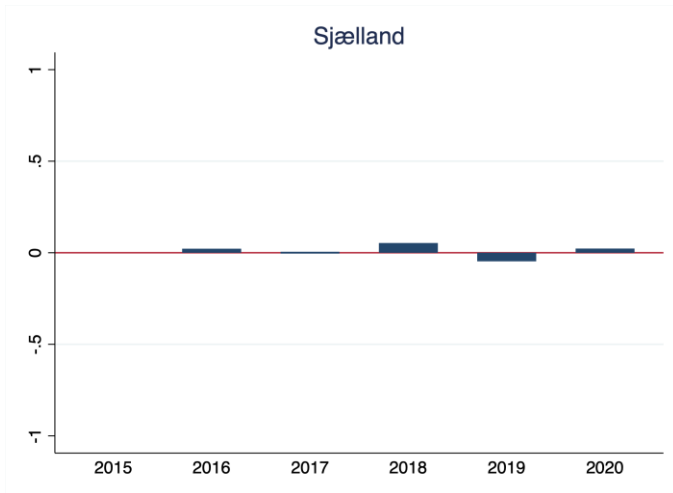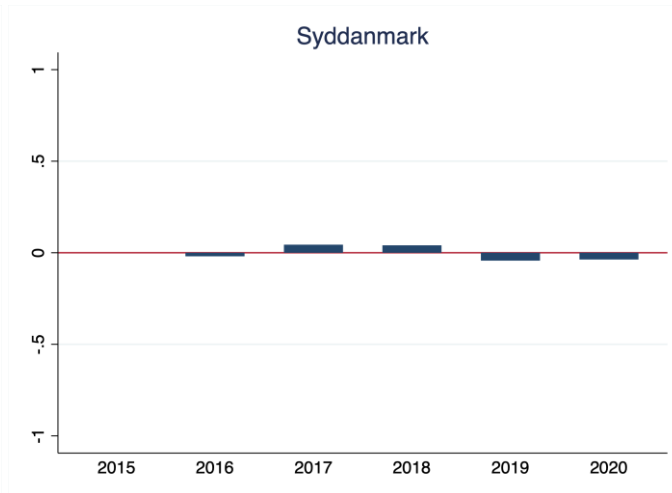

## ESTONIA

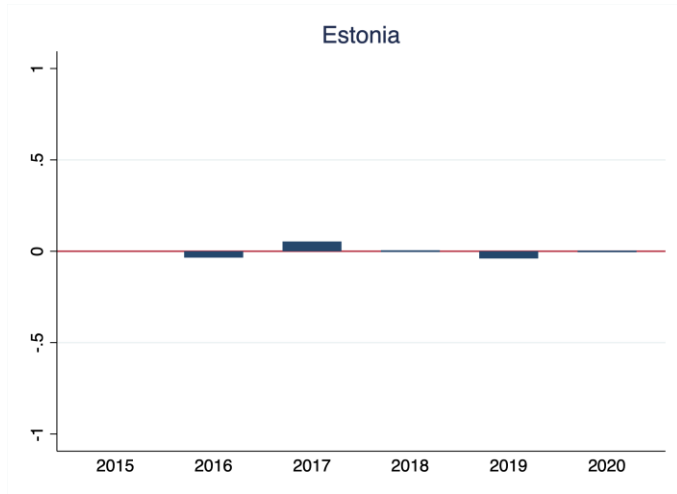

## FINLAND

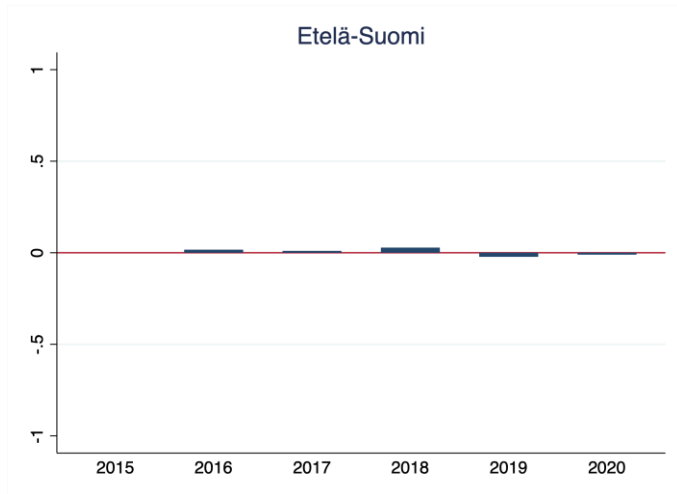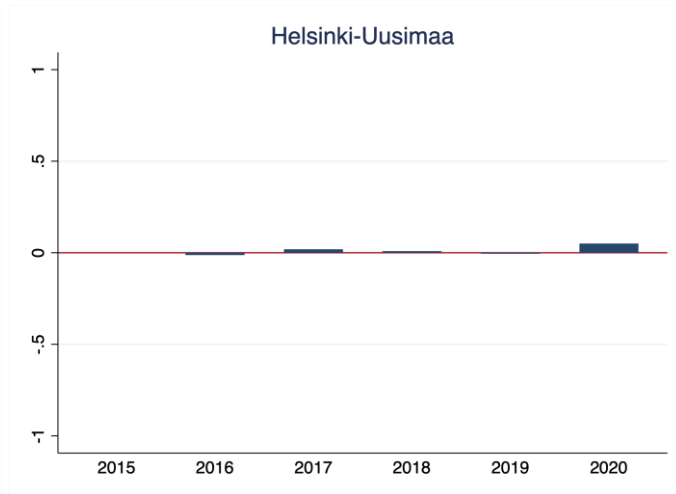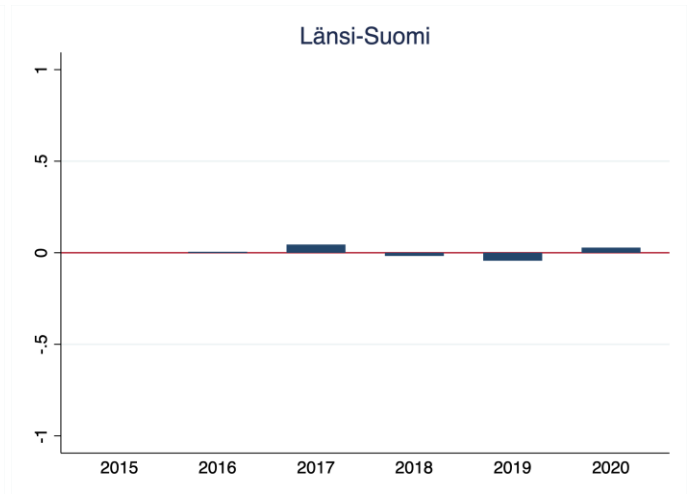

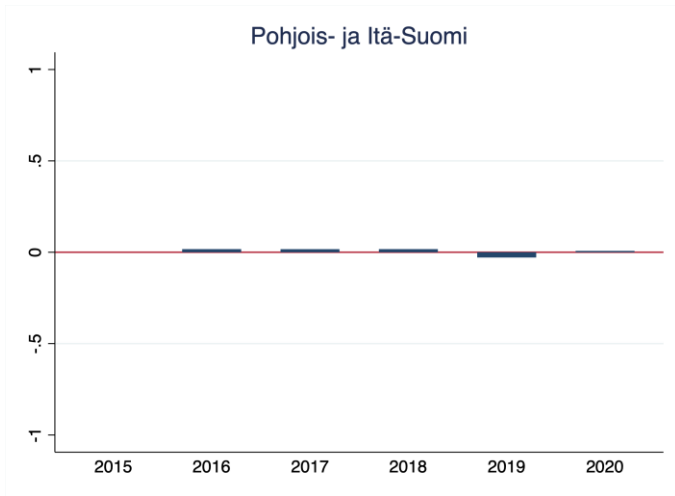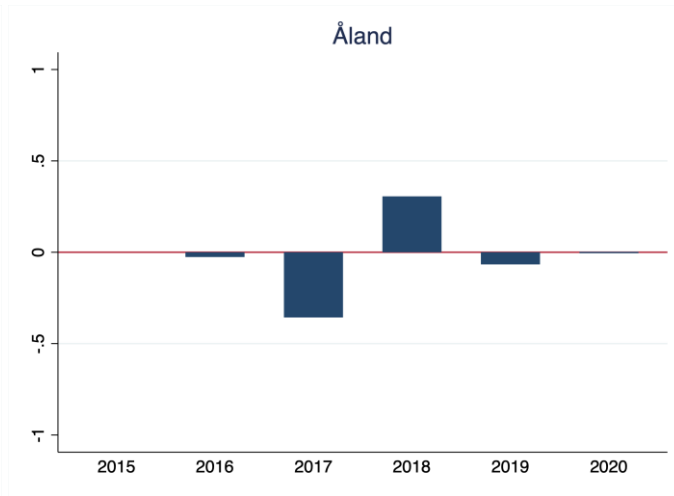

## FRANCE

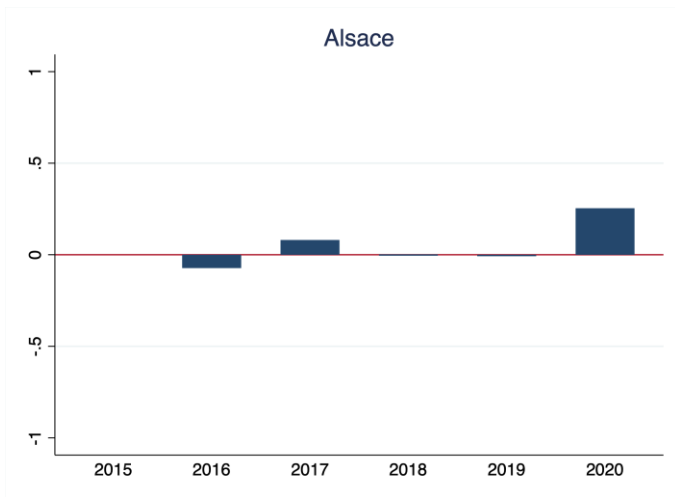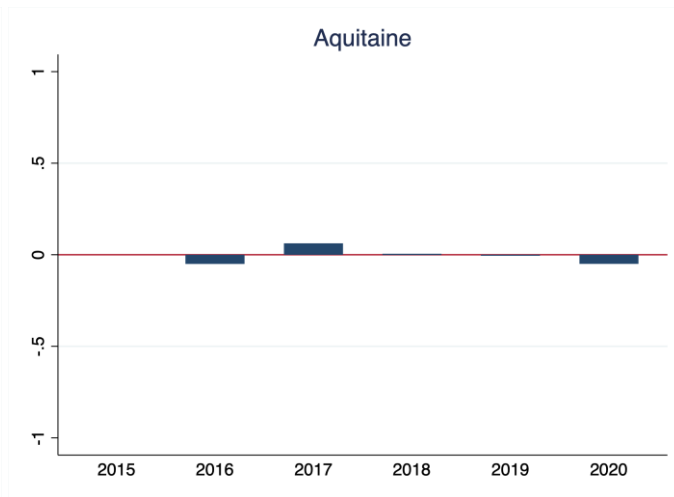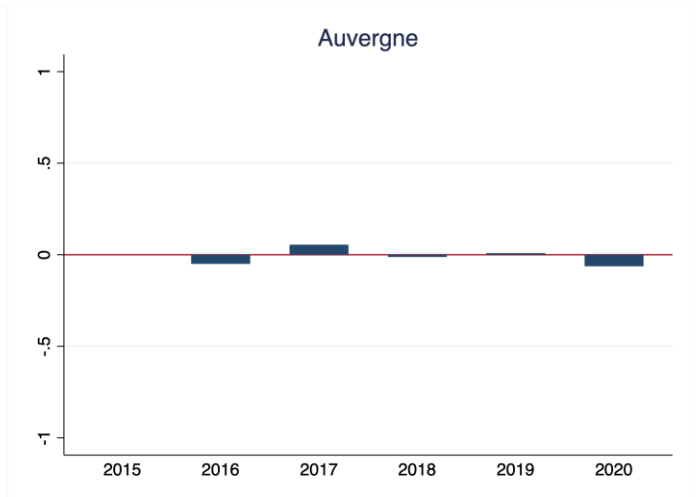



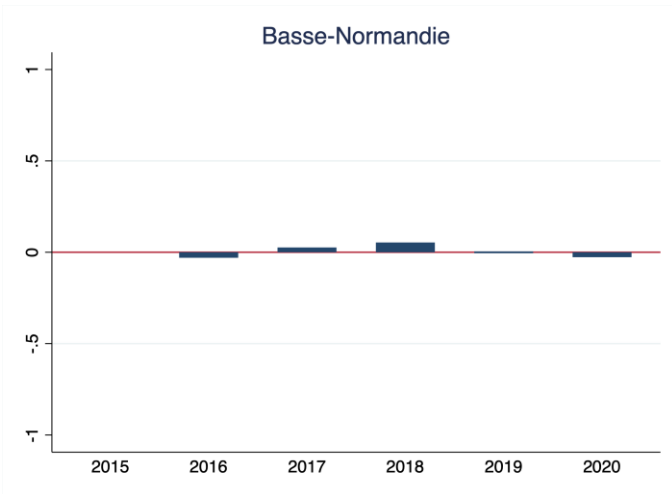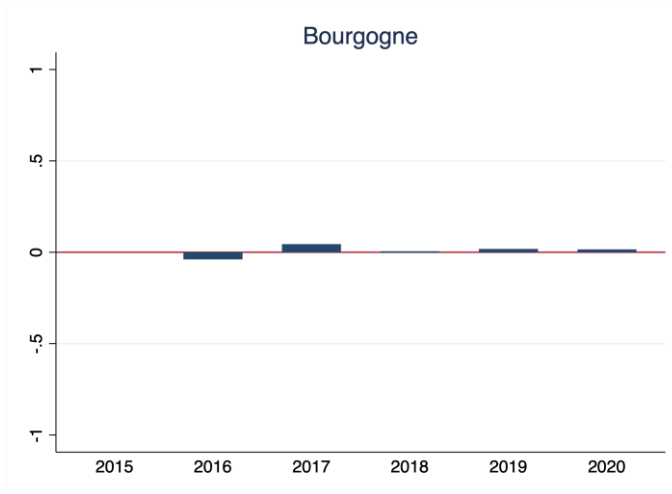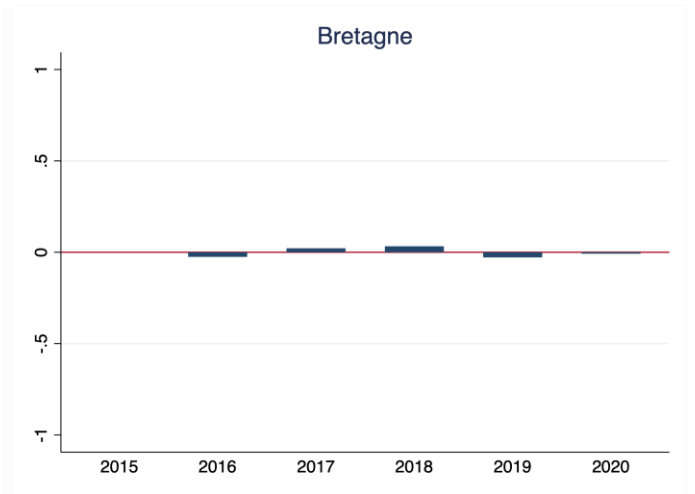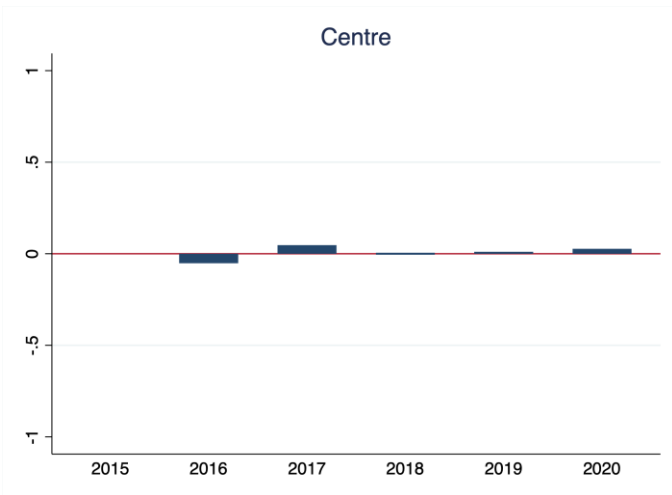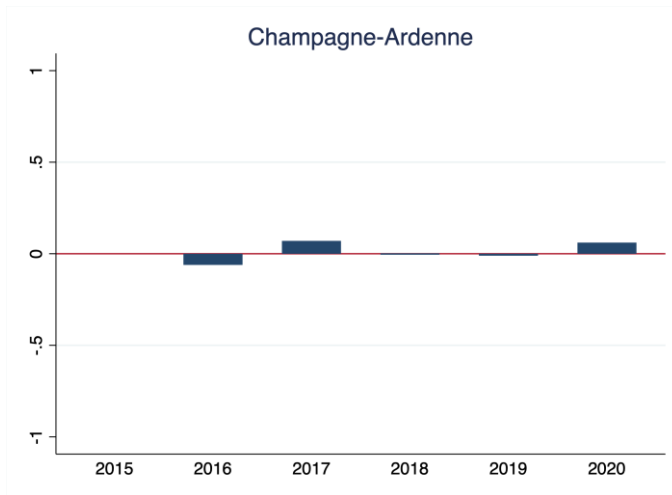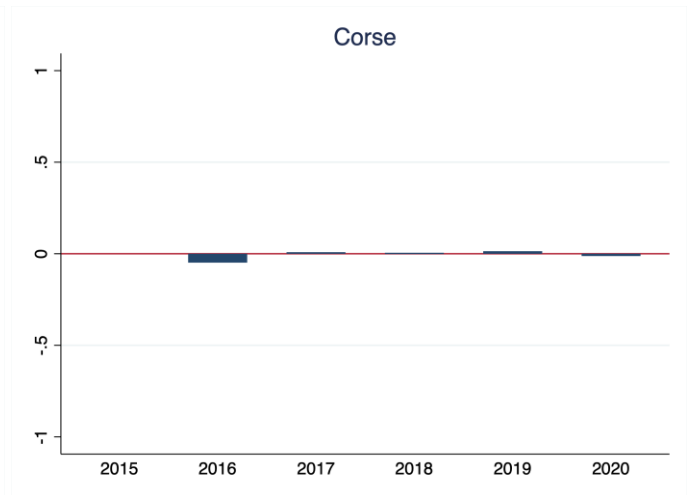

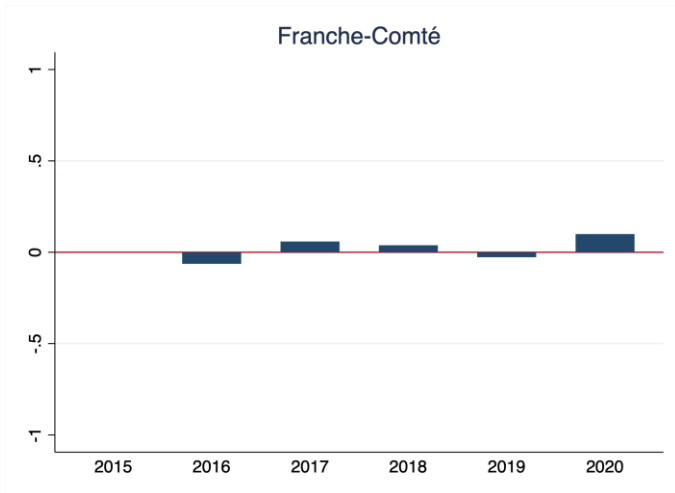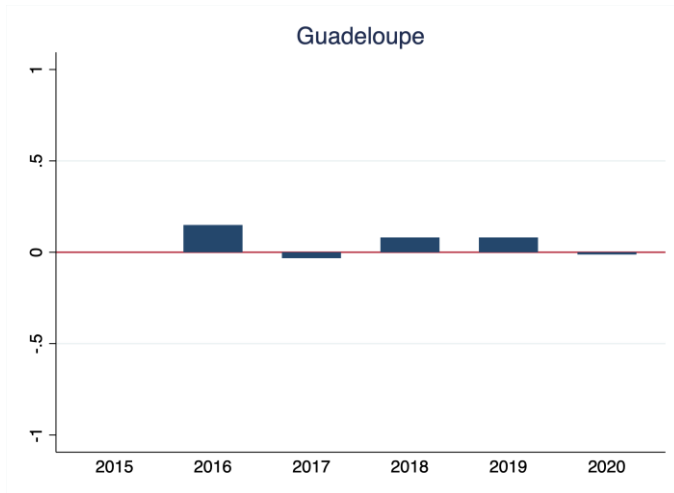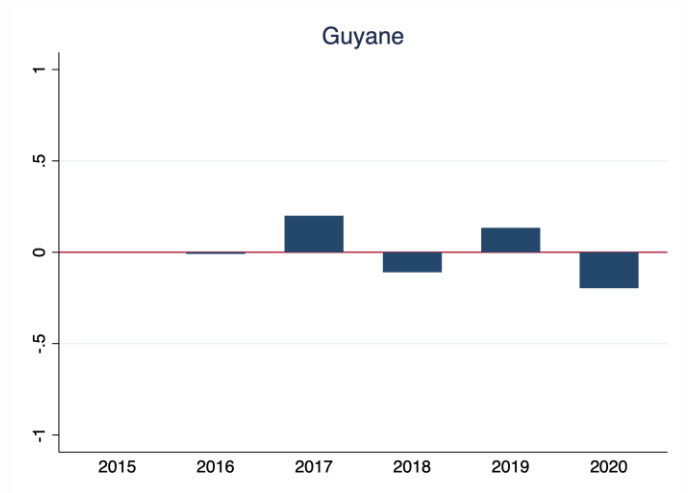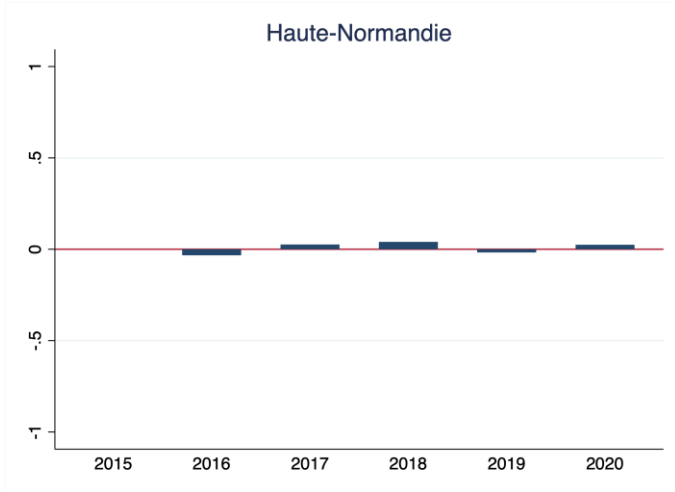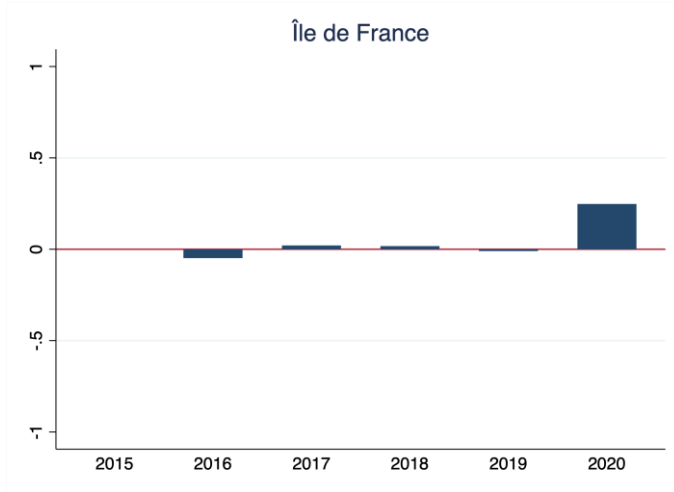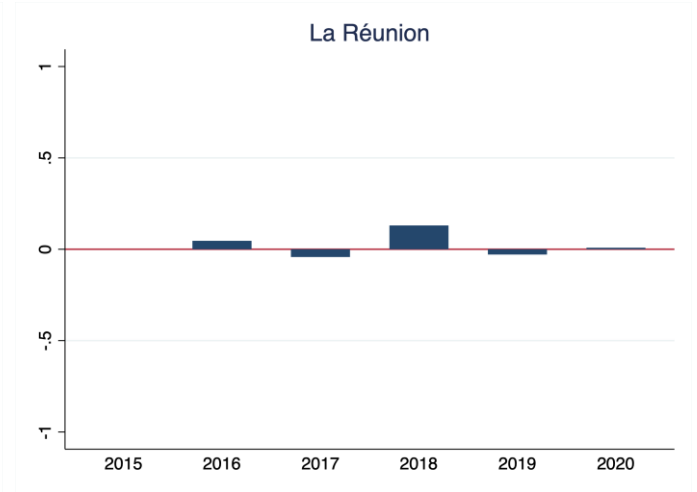

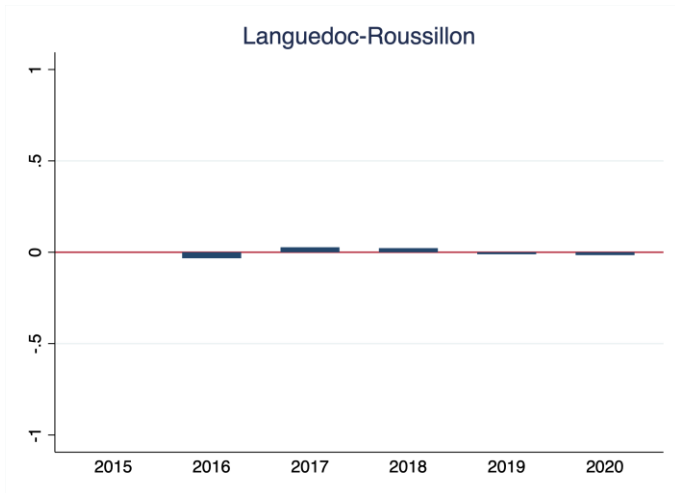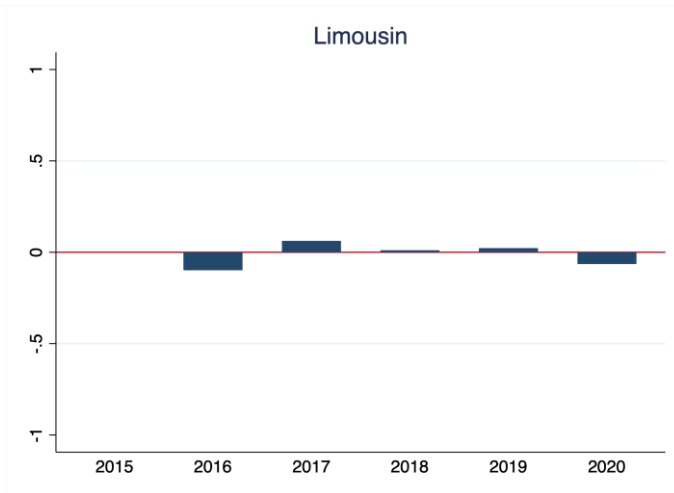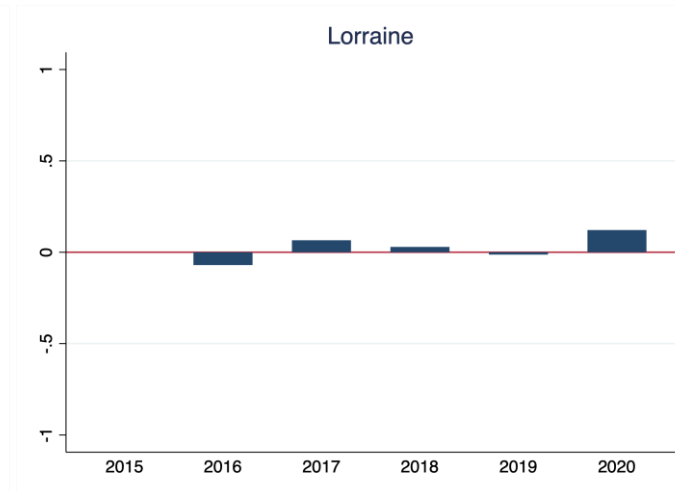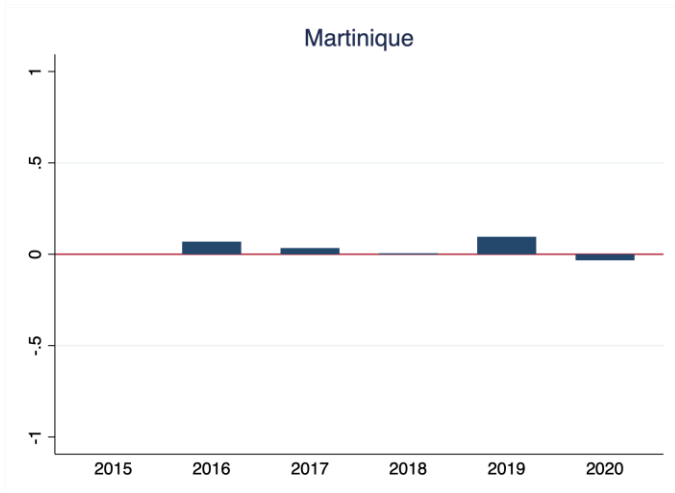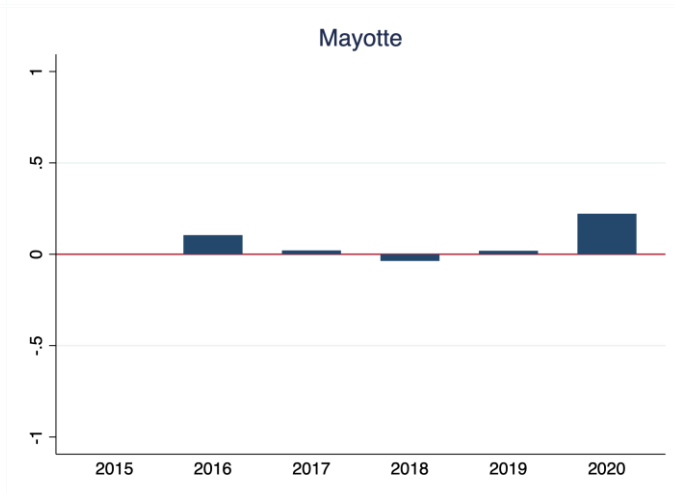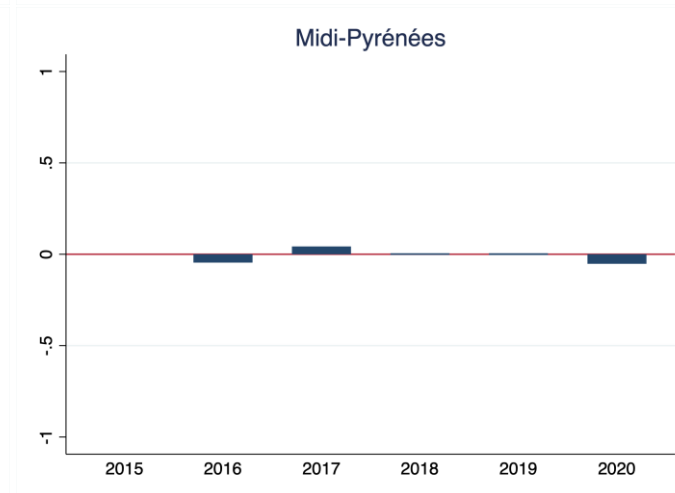

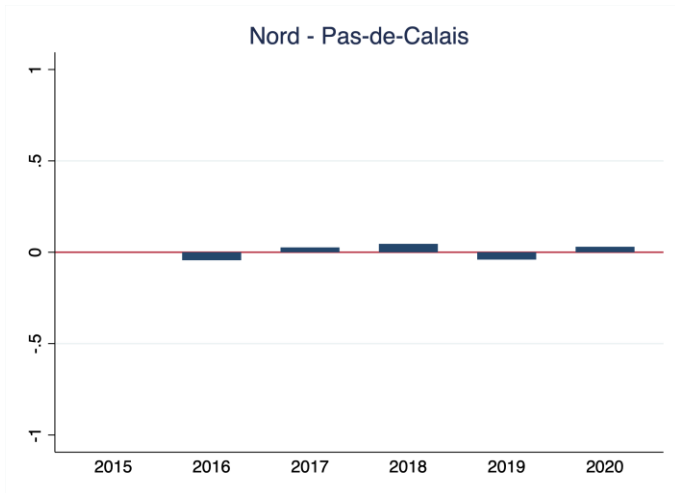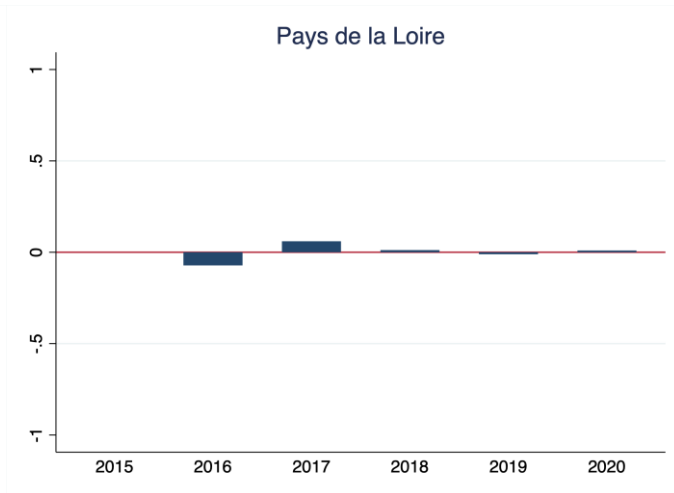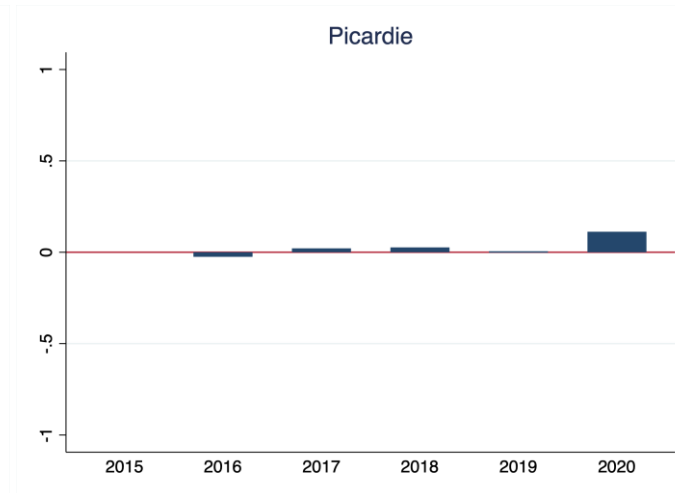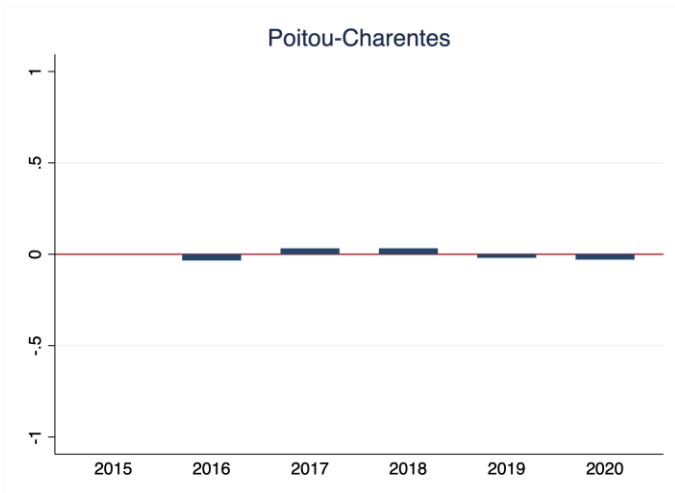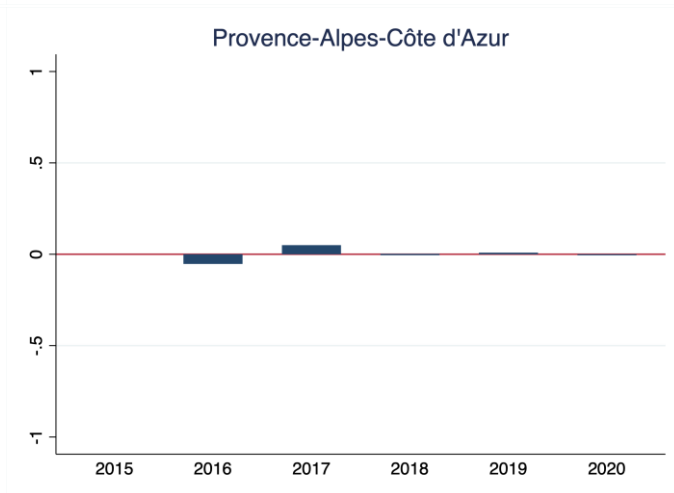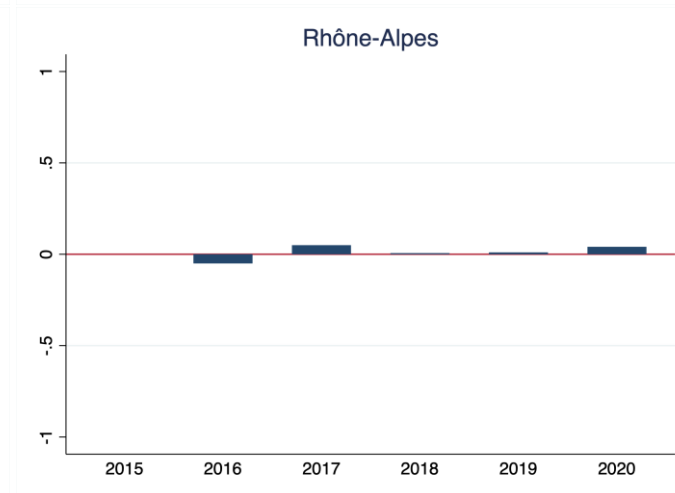

# HUNGARY

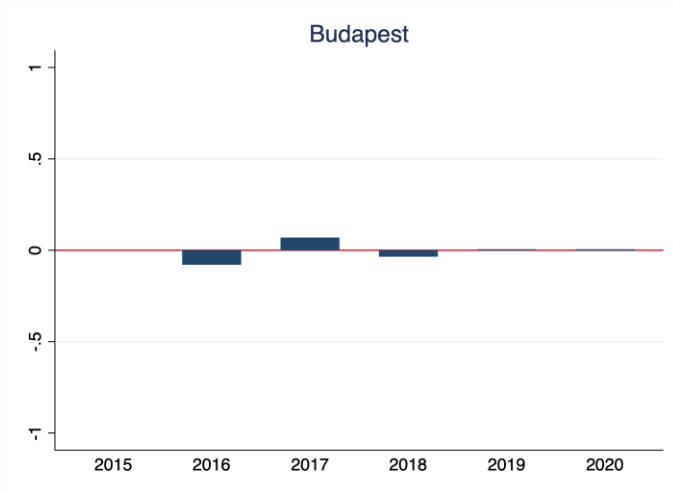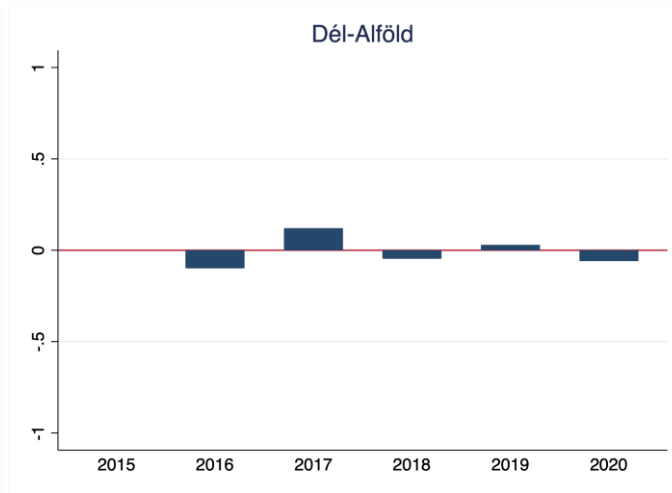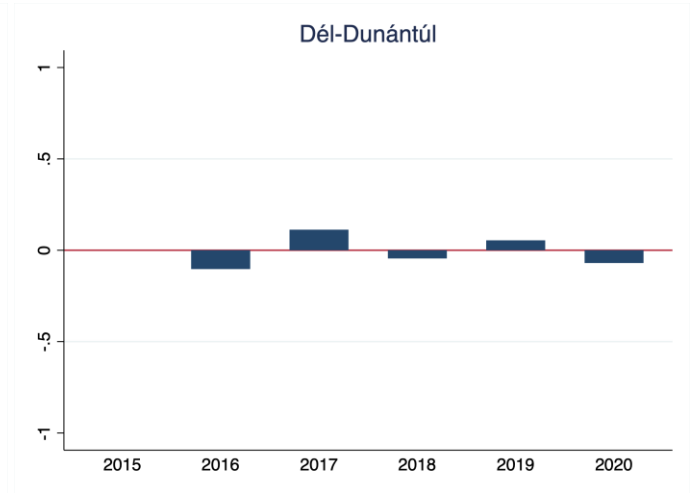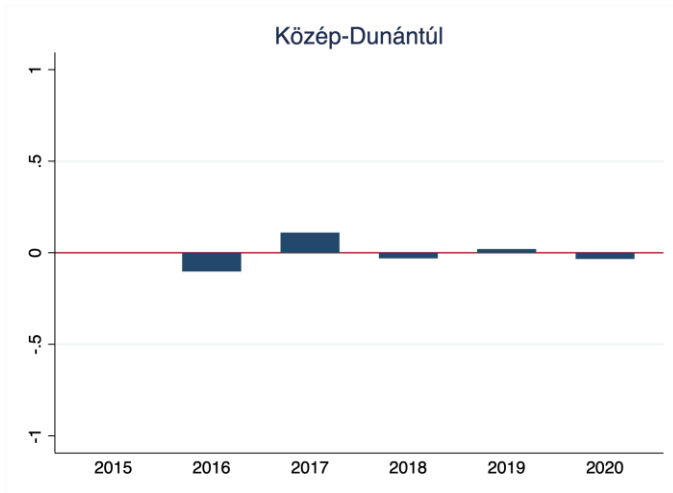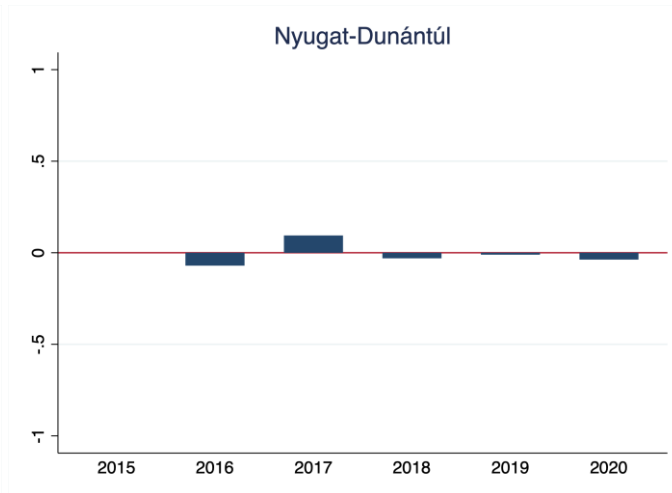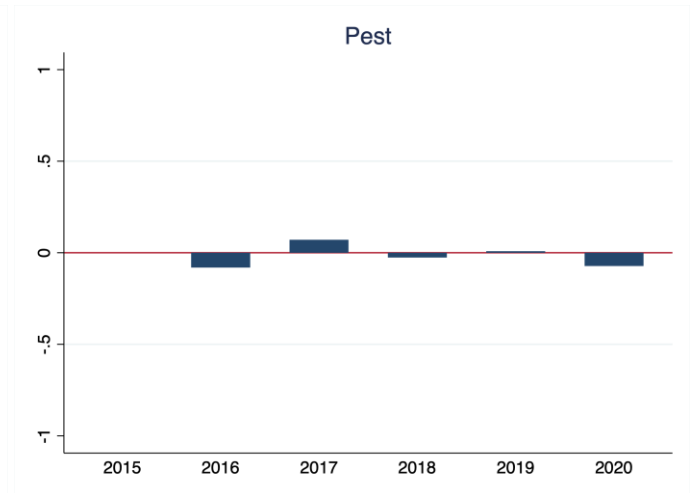

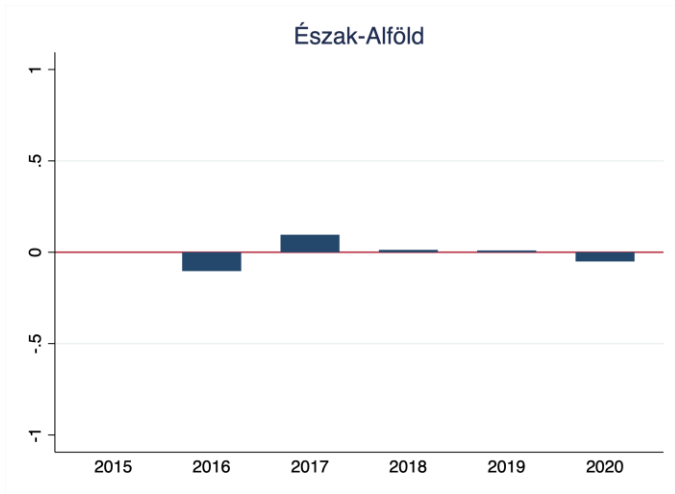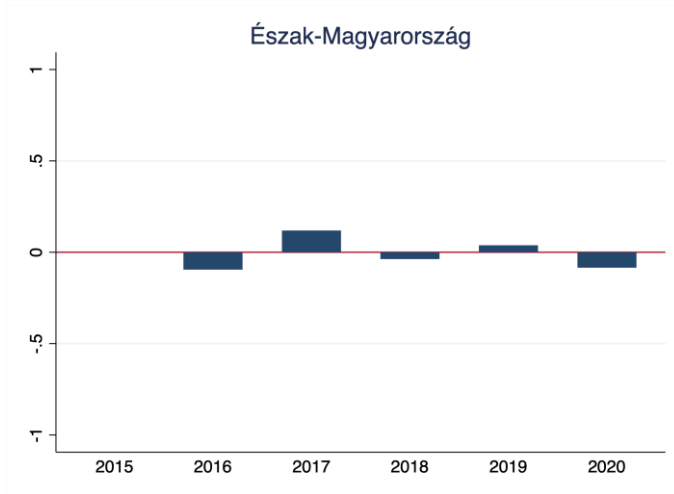

## ITALY

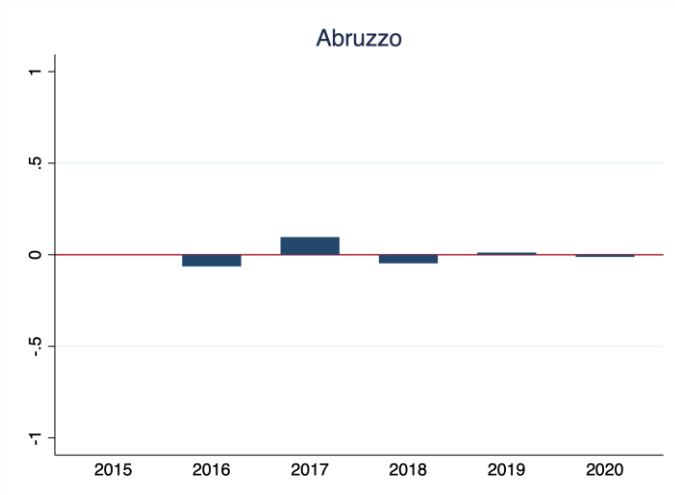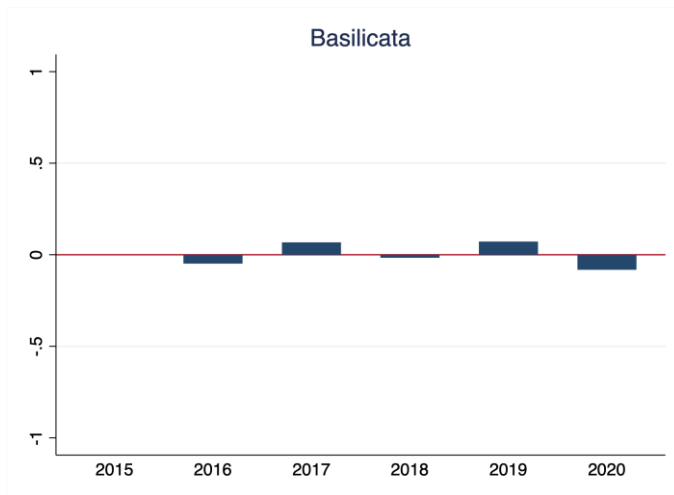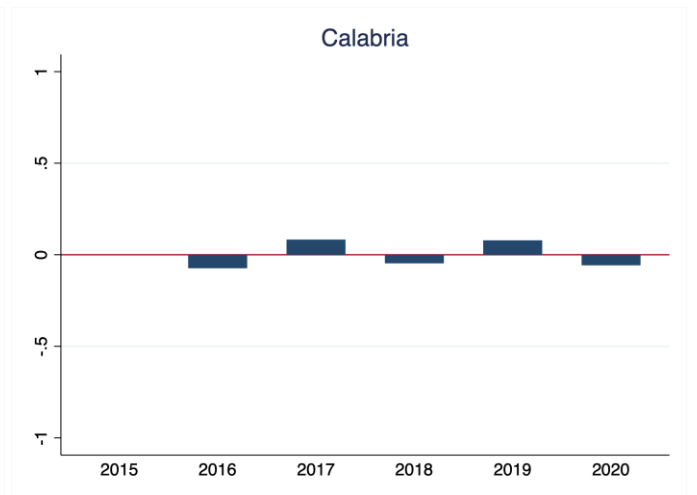

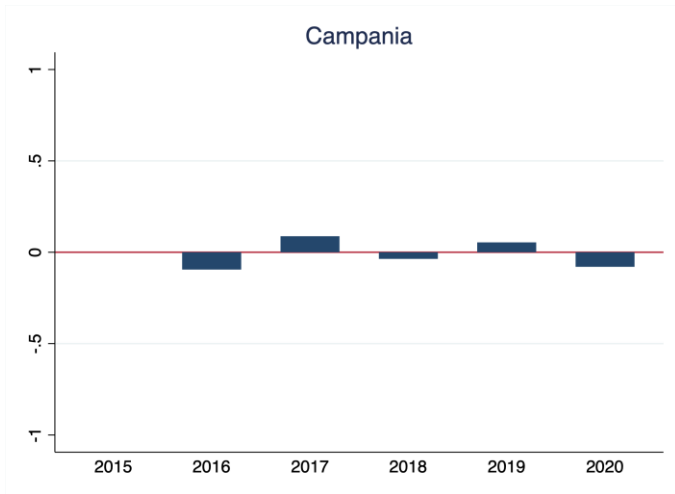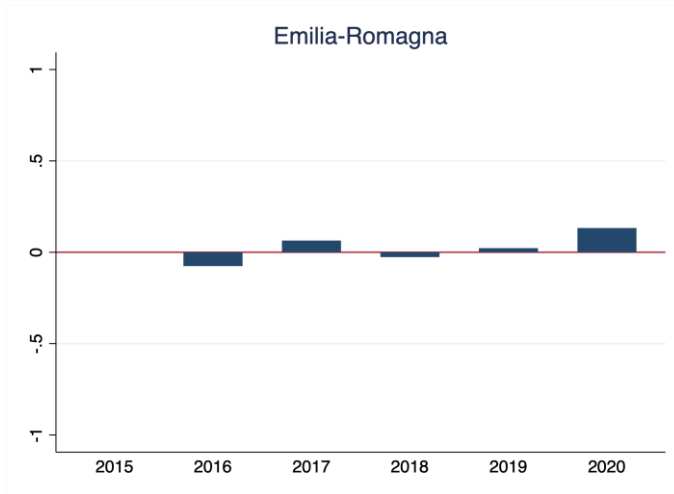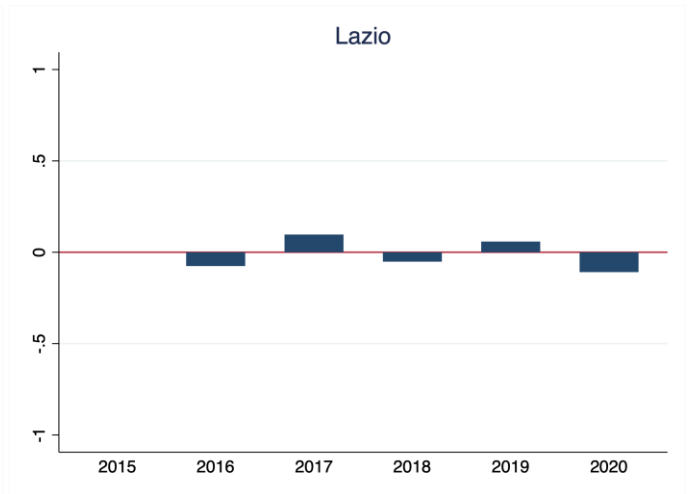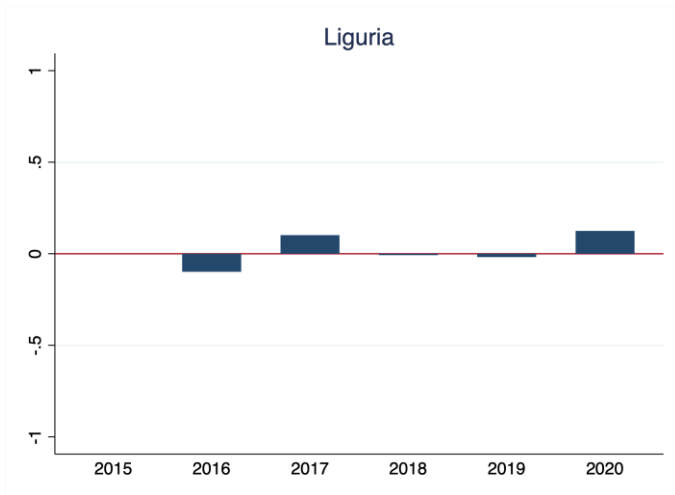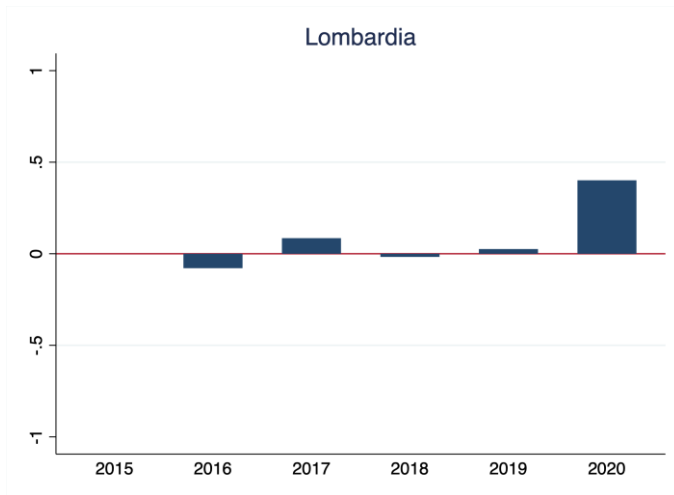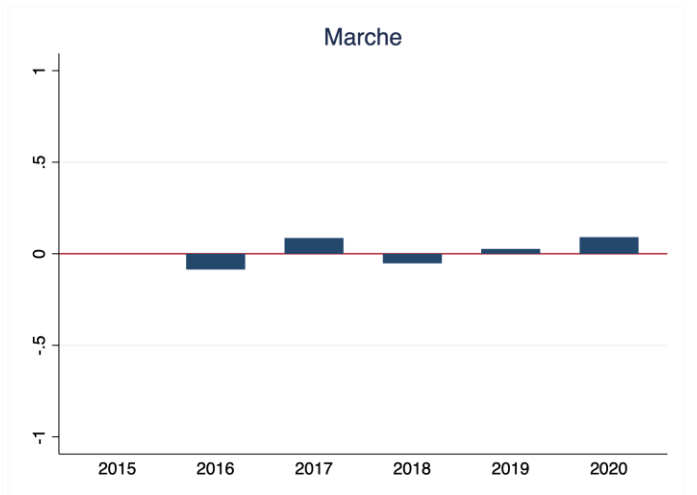

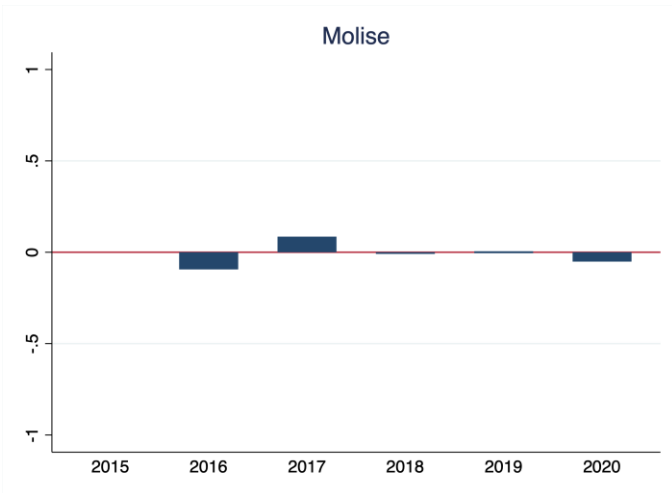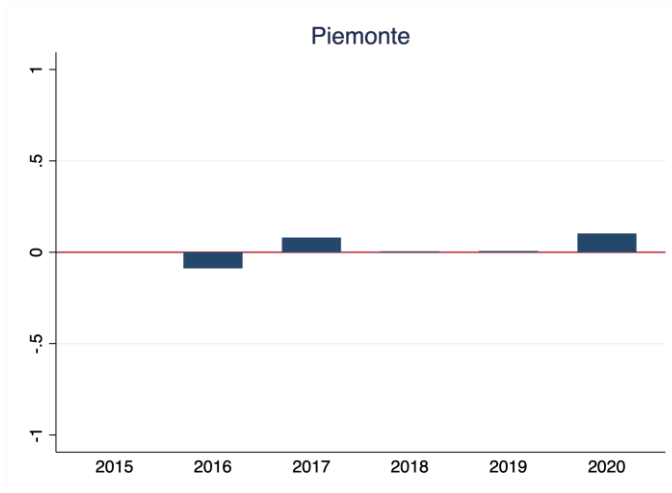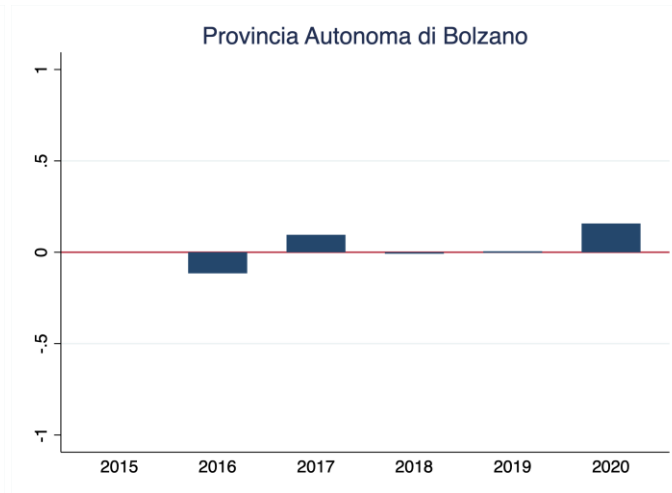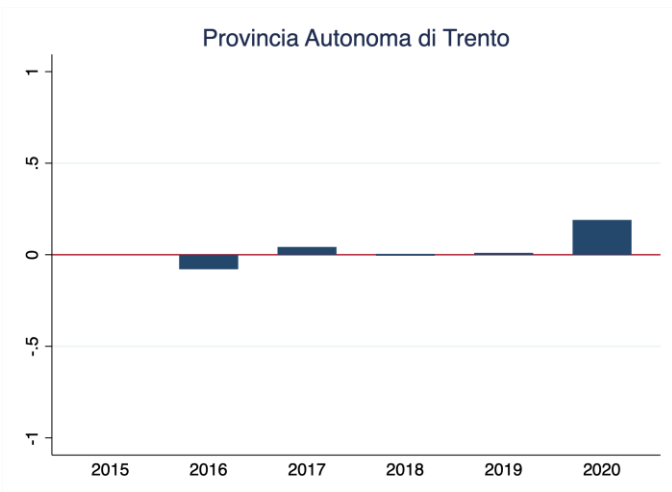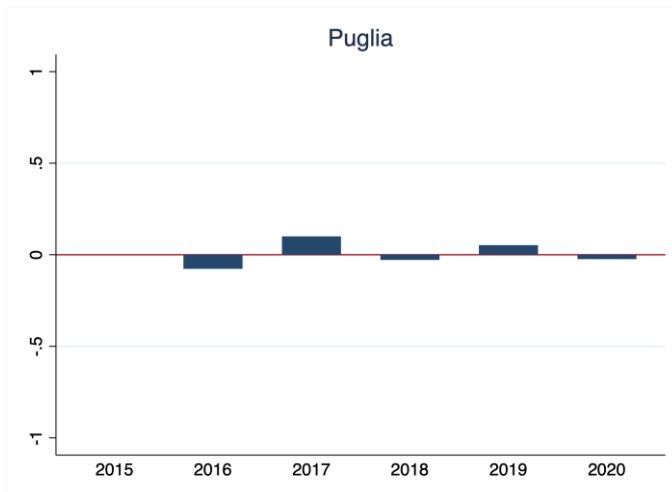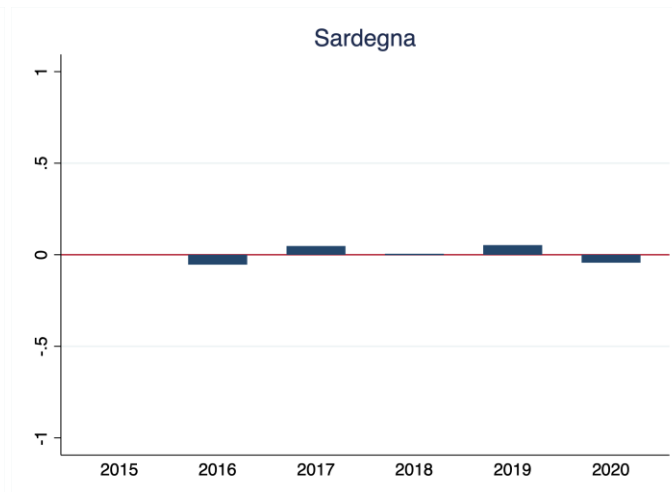



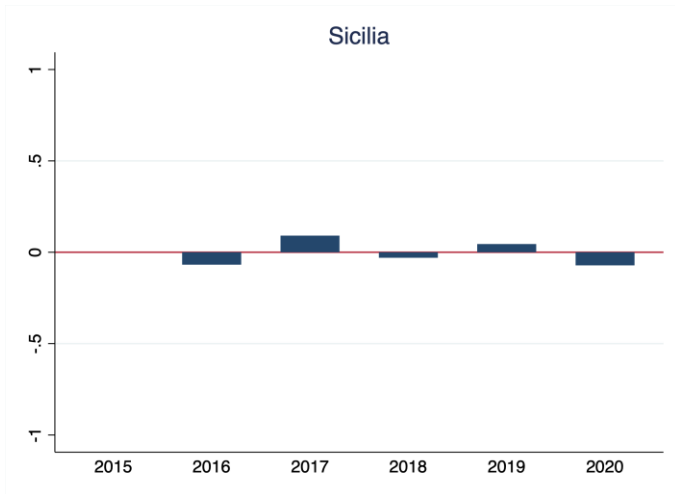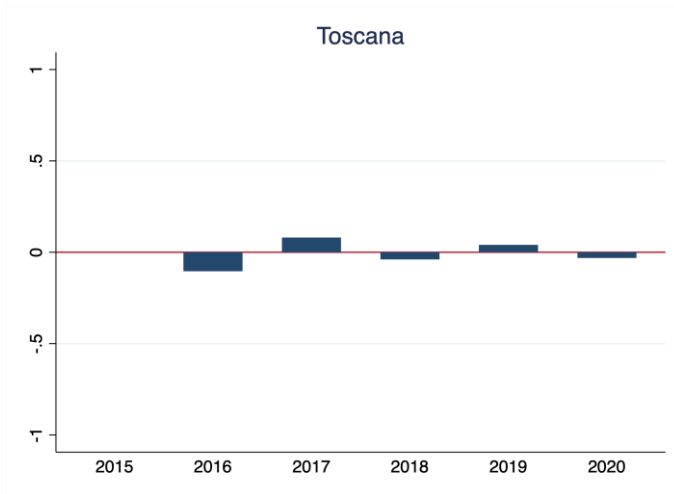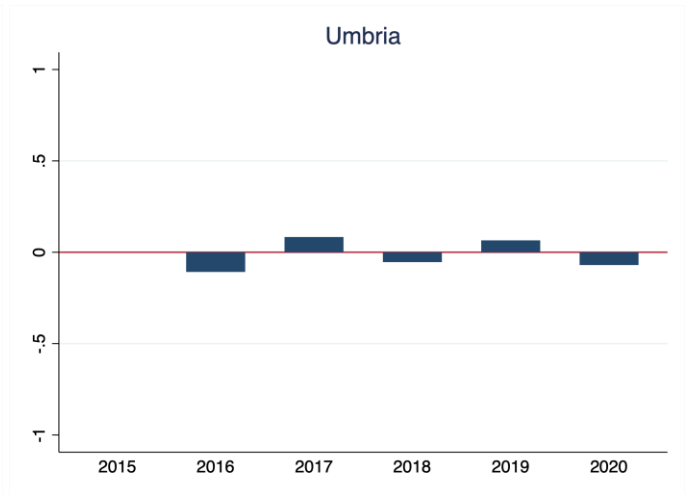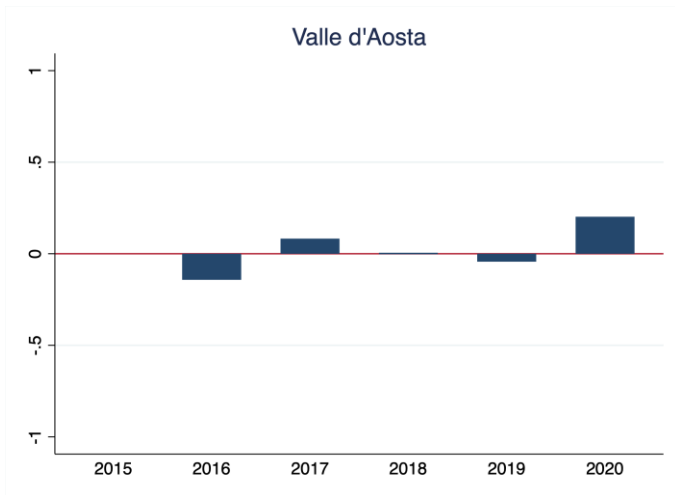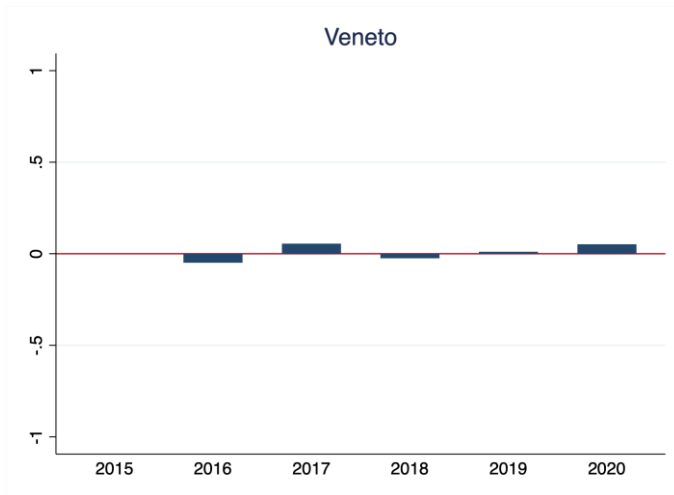

## LITHUANIA

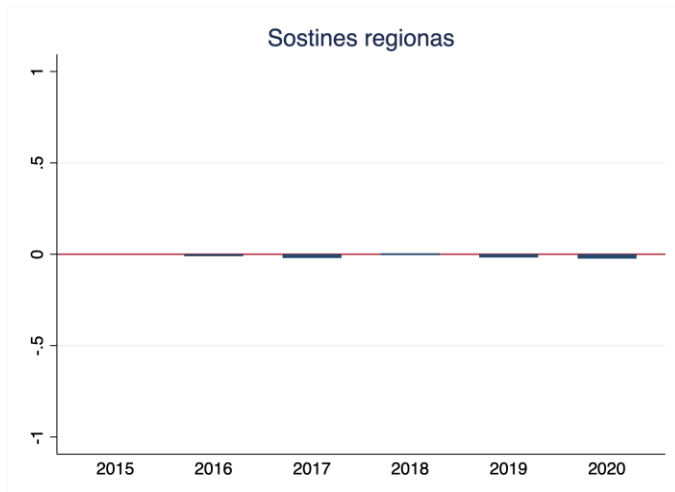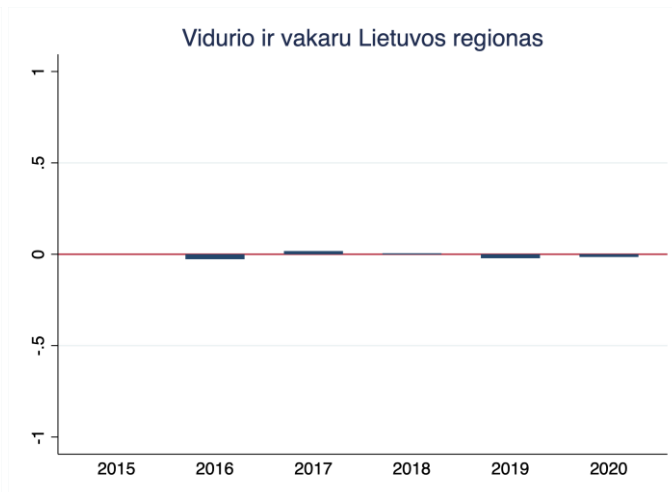

## LUXEMBOURG

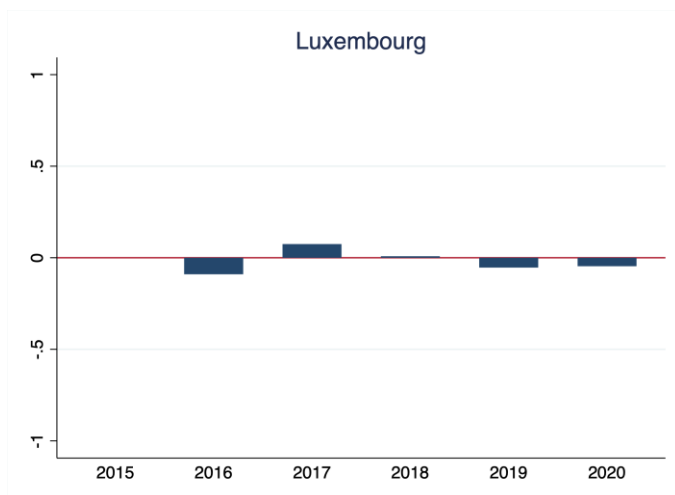

## LATVIA

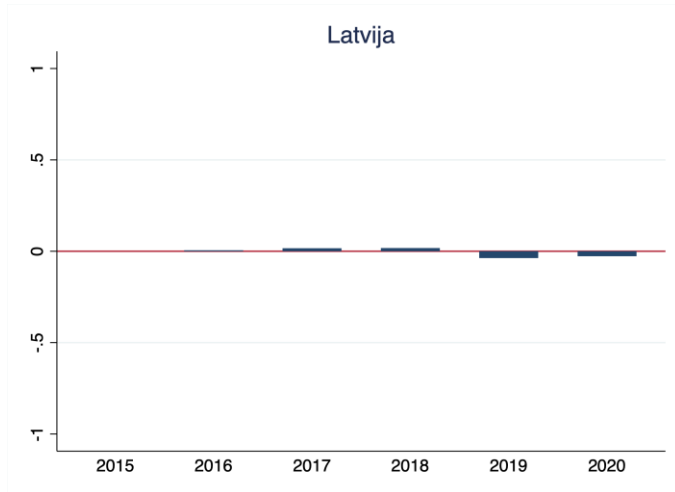

## NETHERLANDS

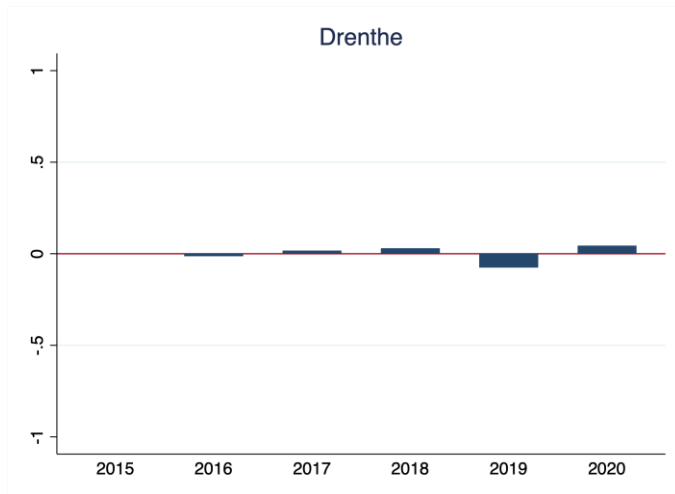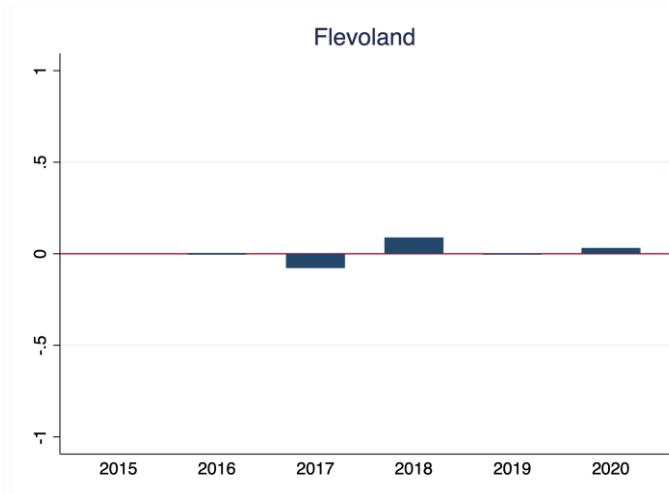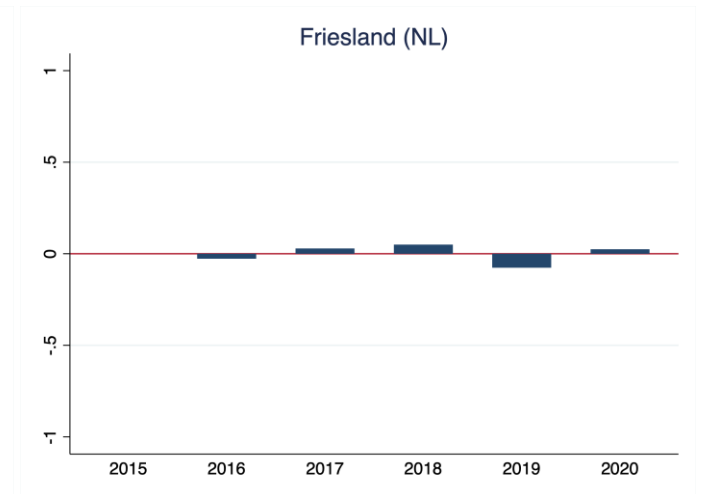

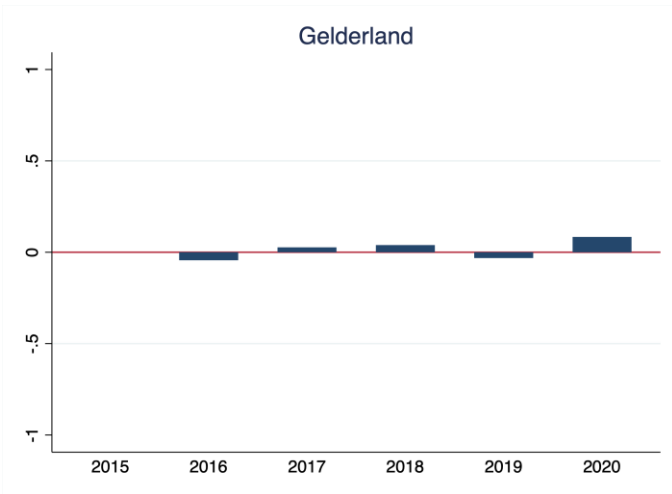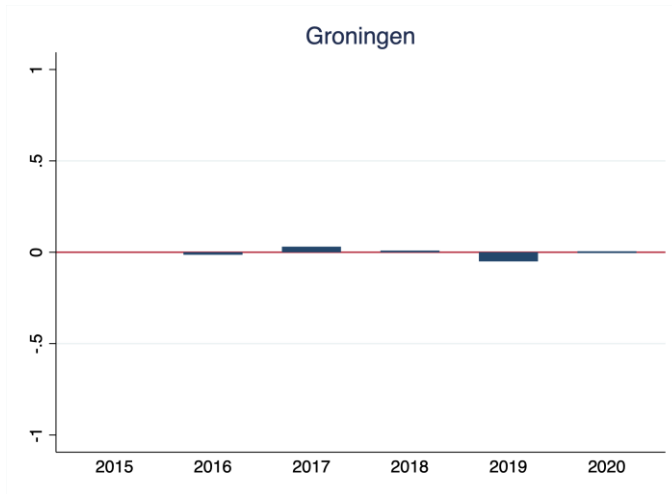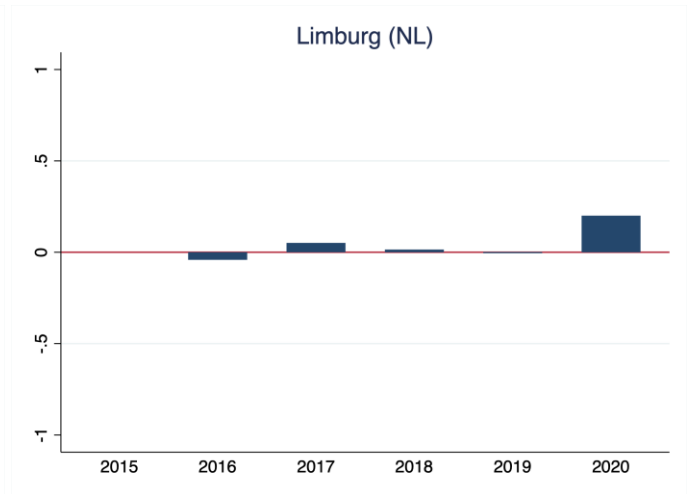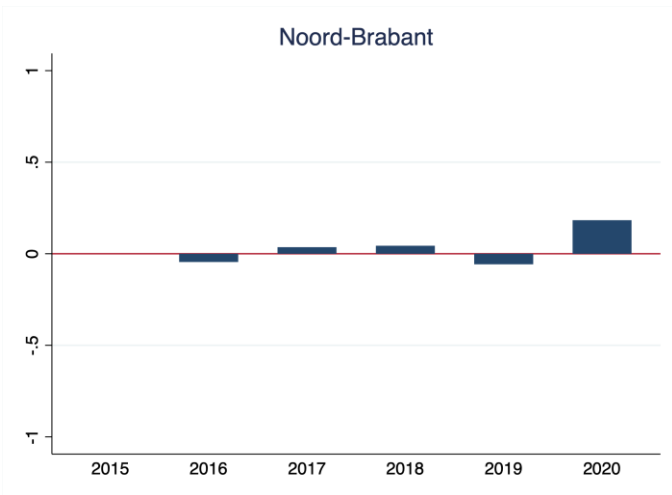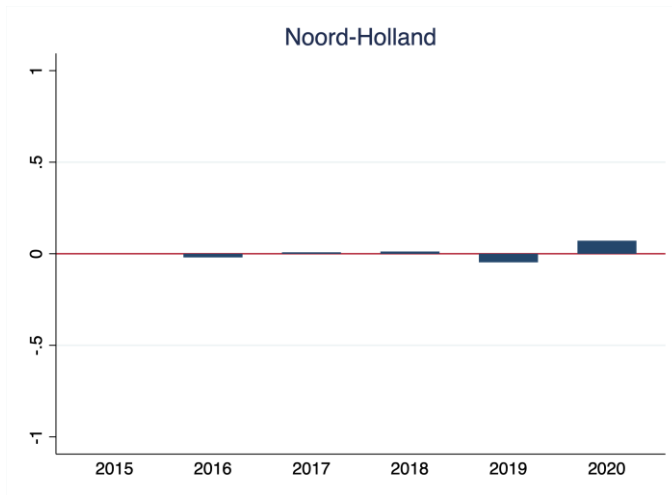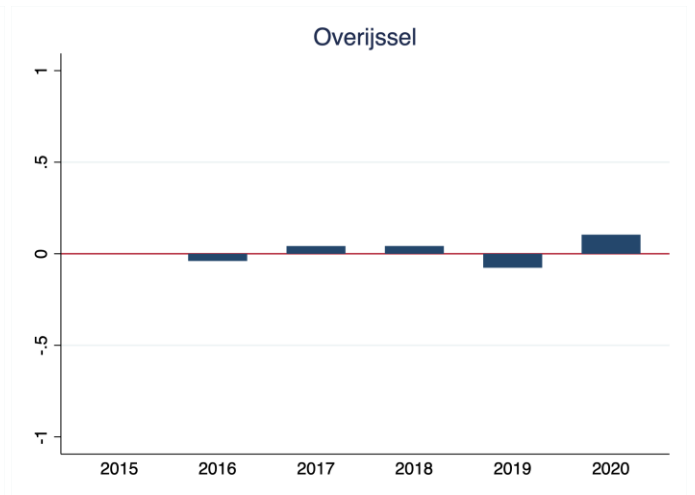

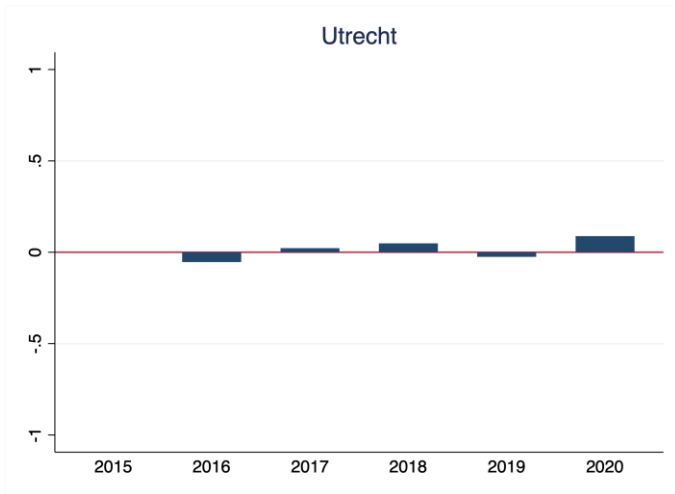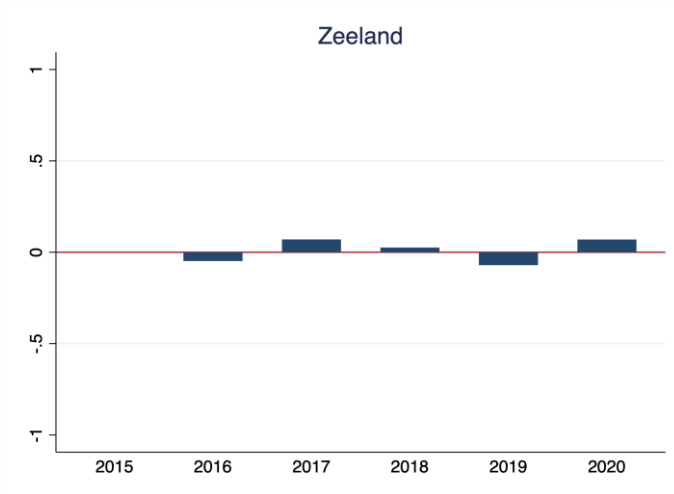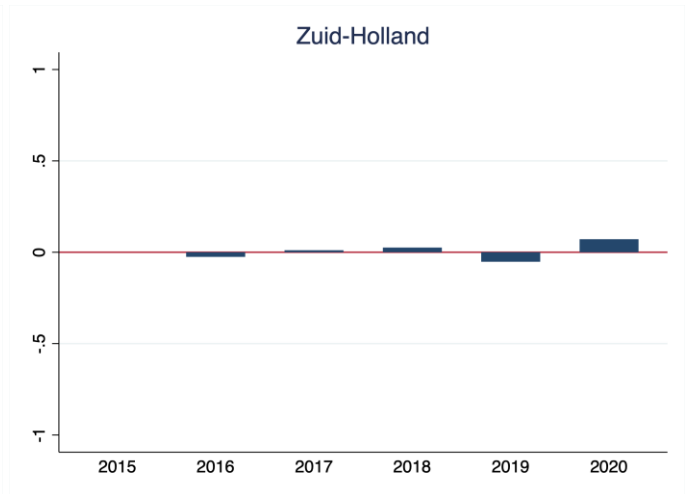

## NORWAY

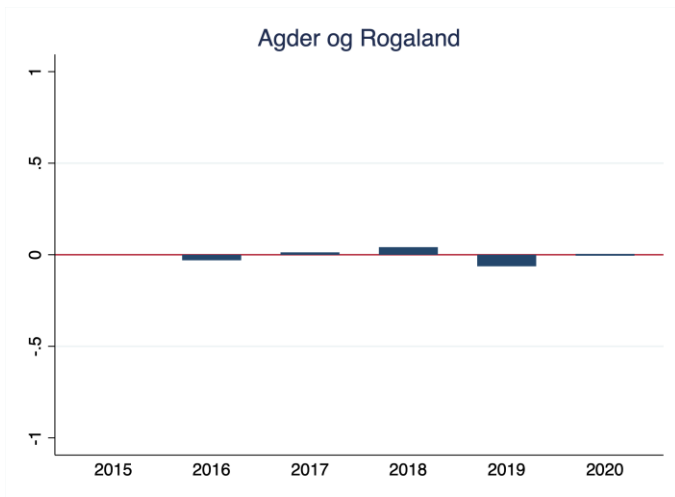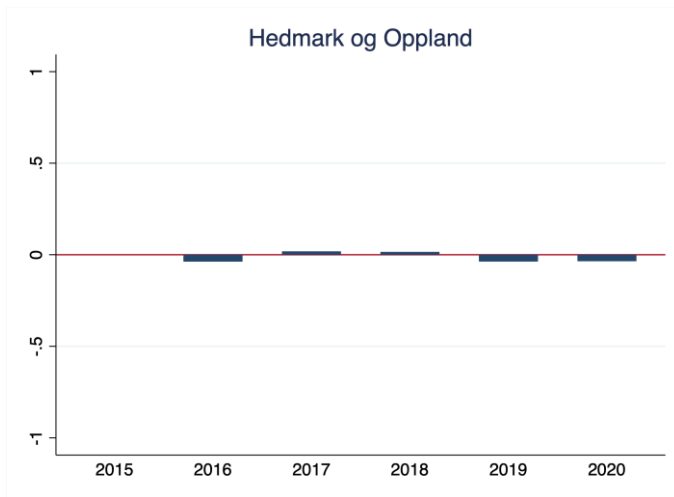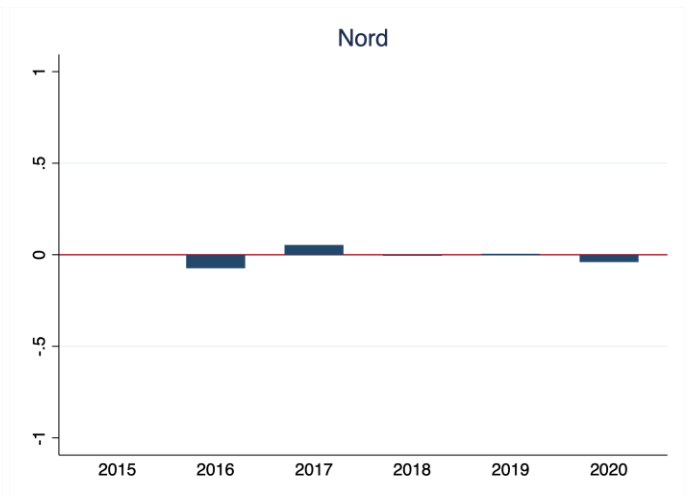

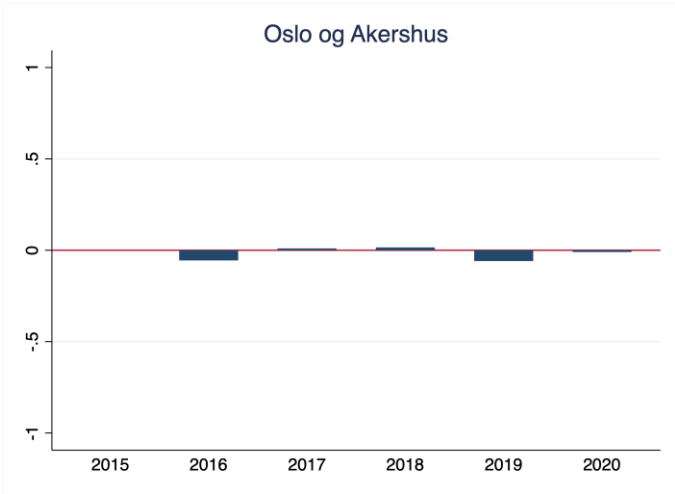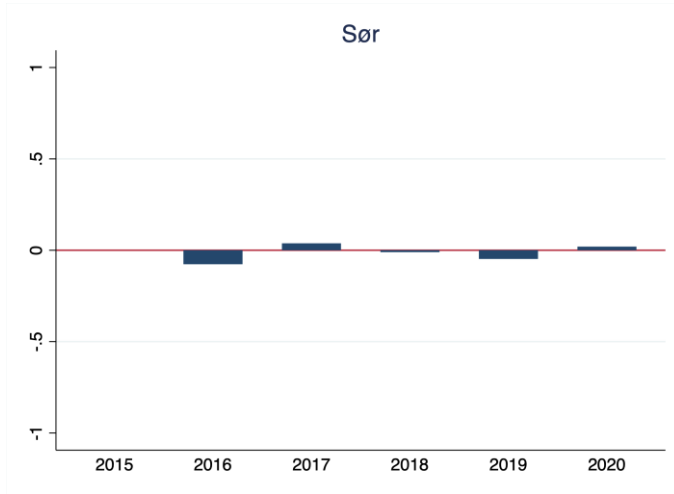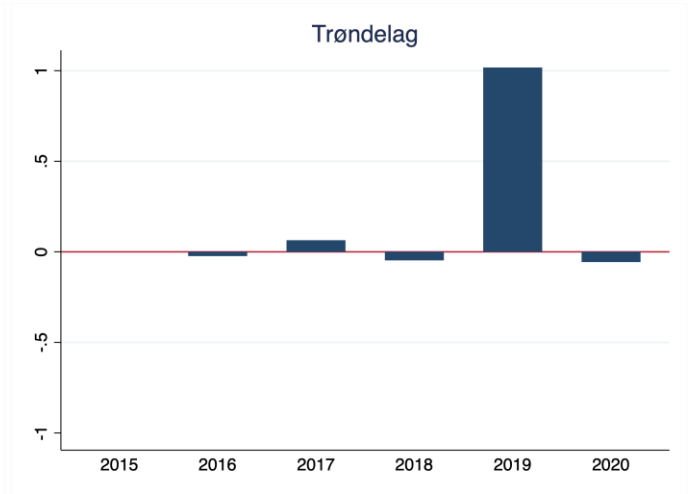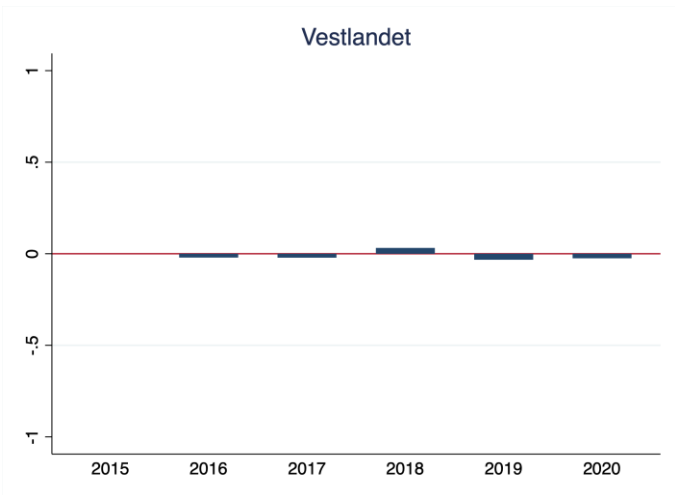

POLAND

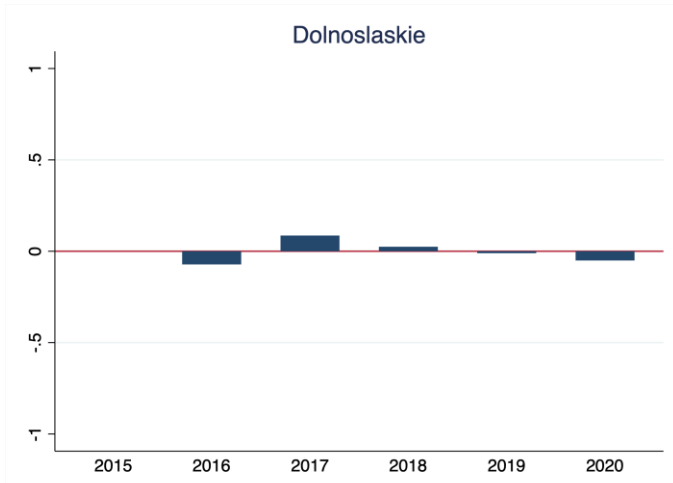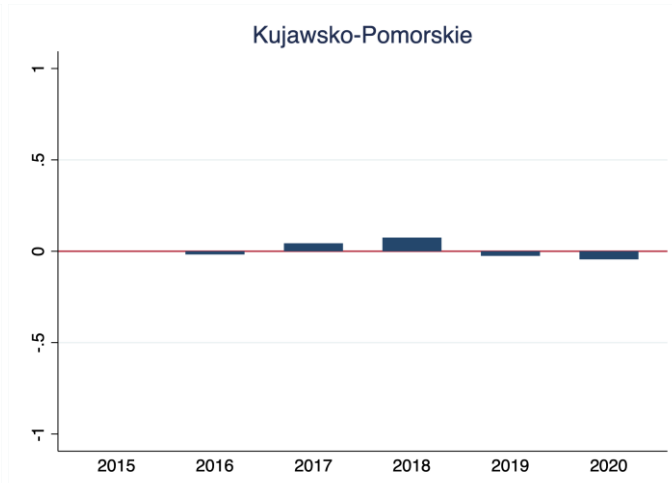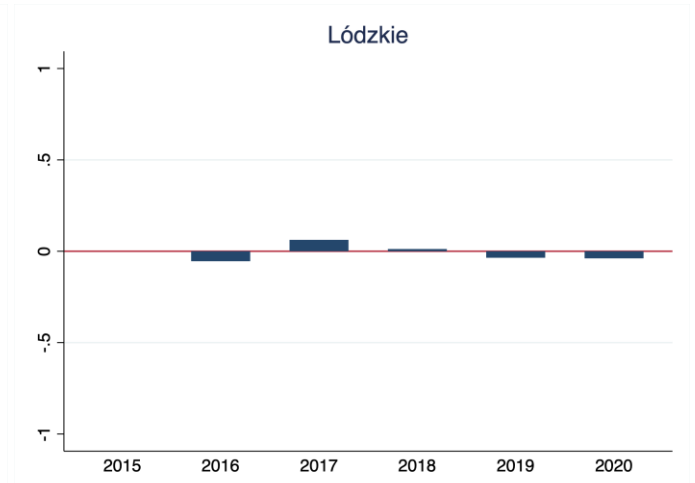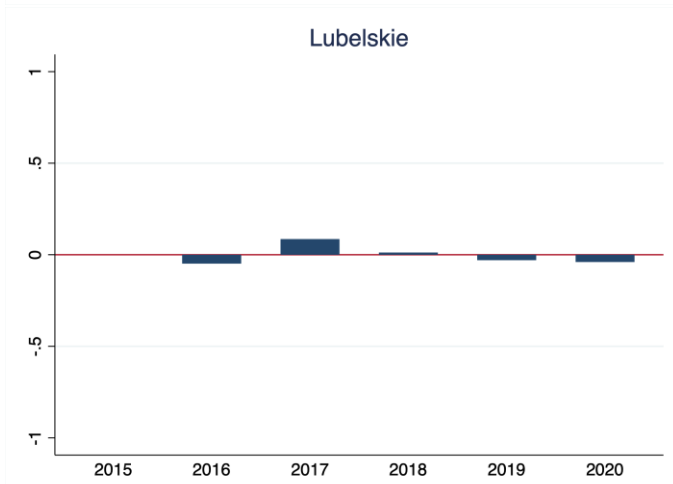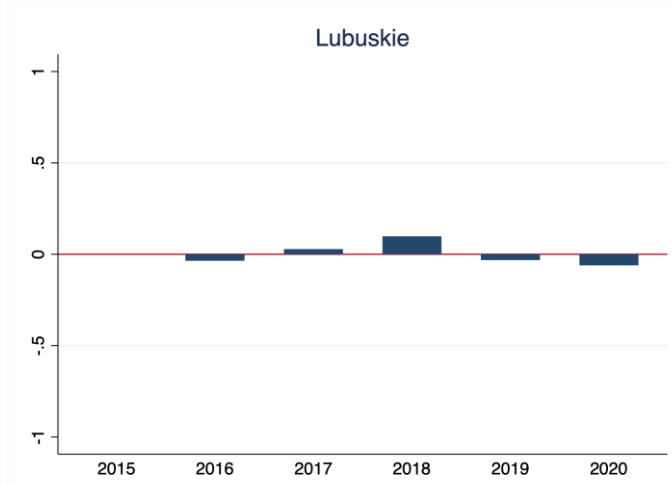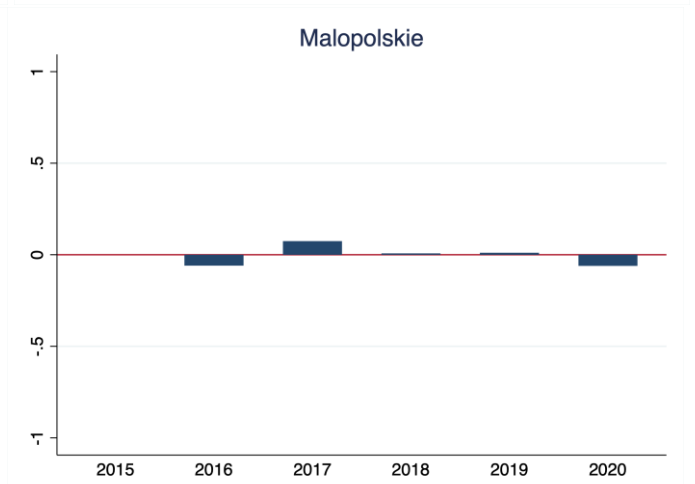

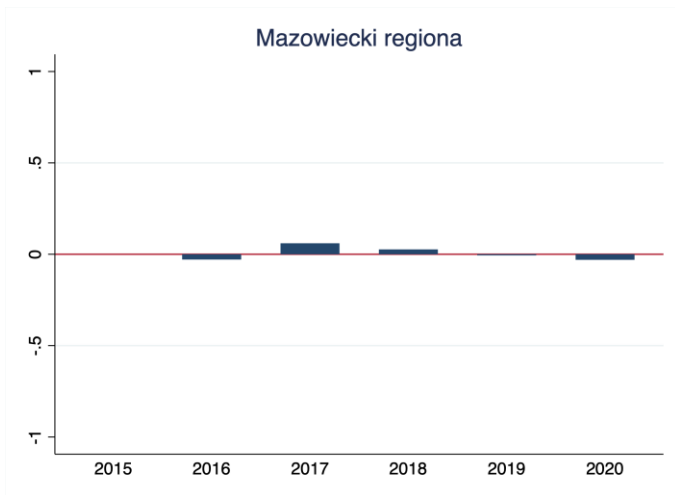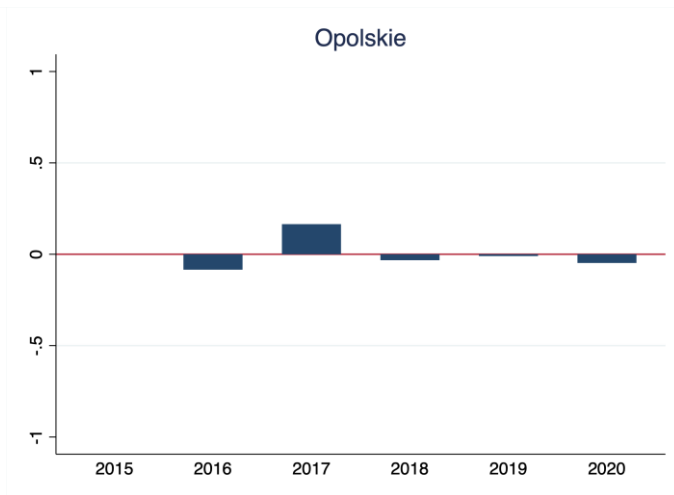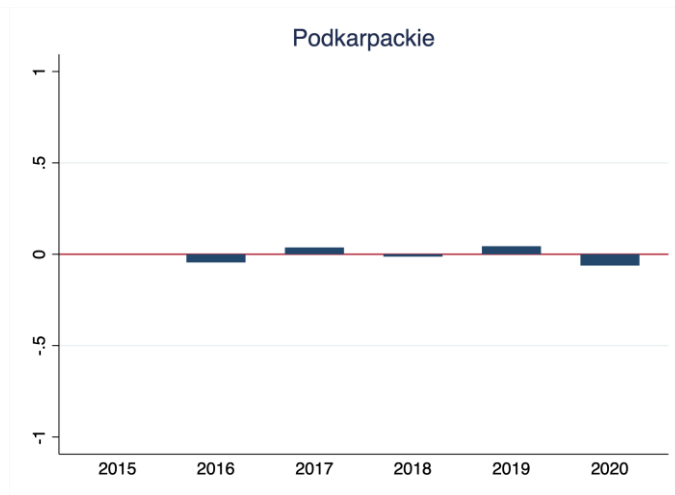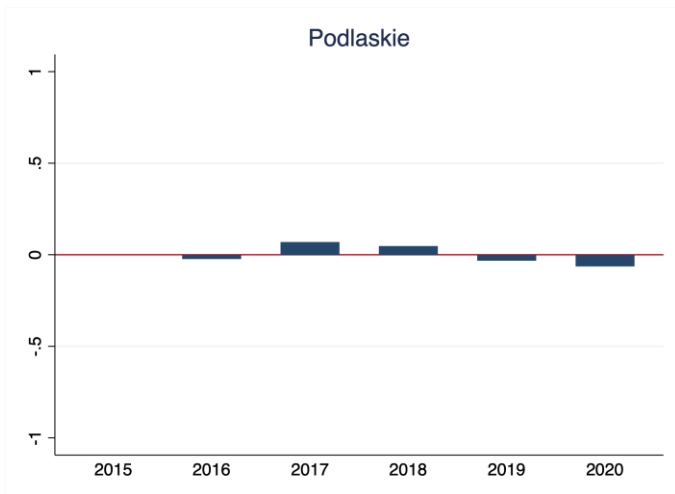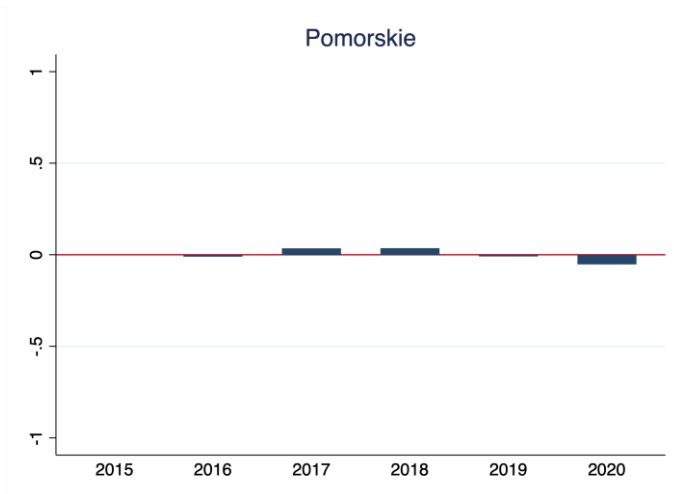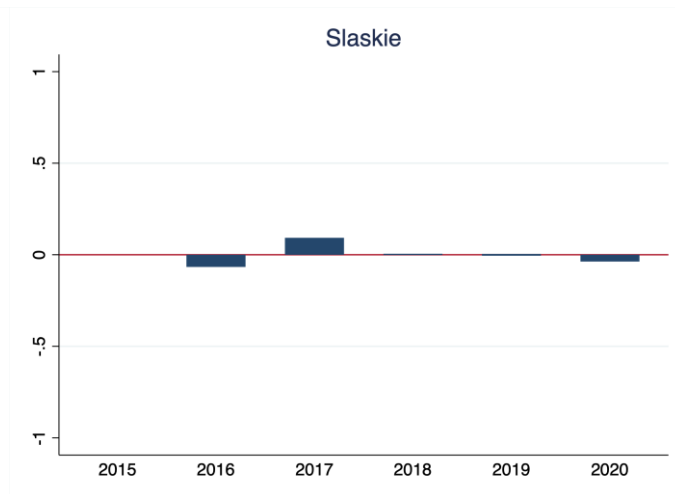



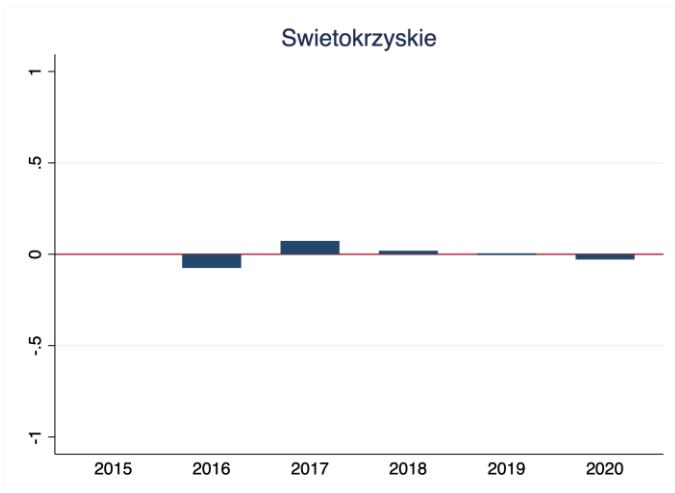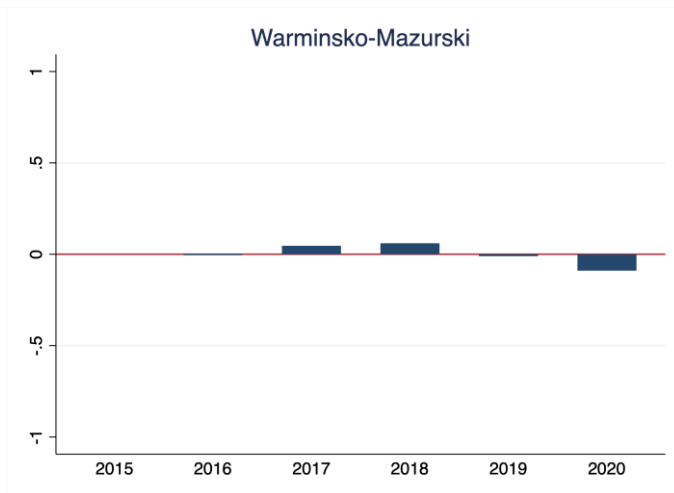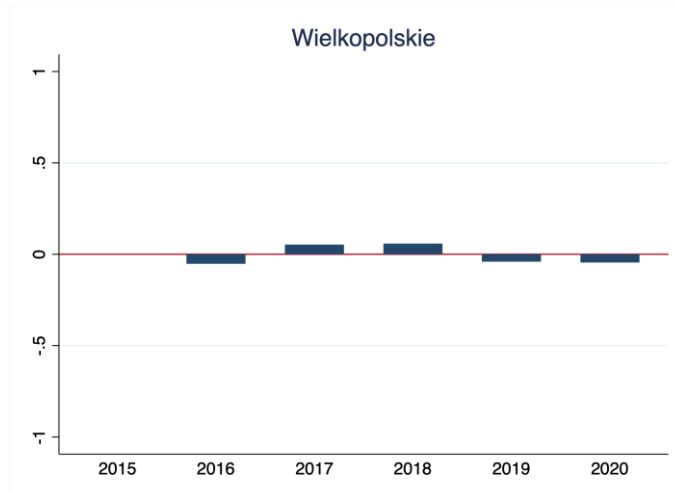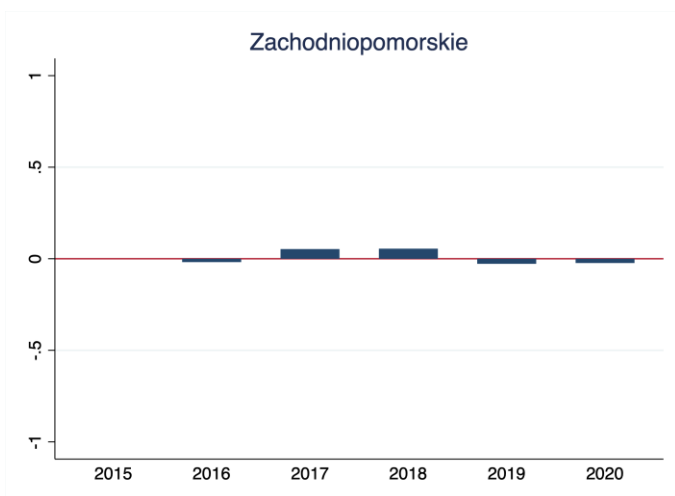

# PORTUGAL

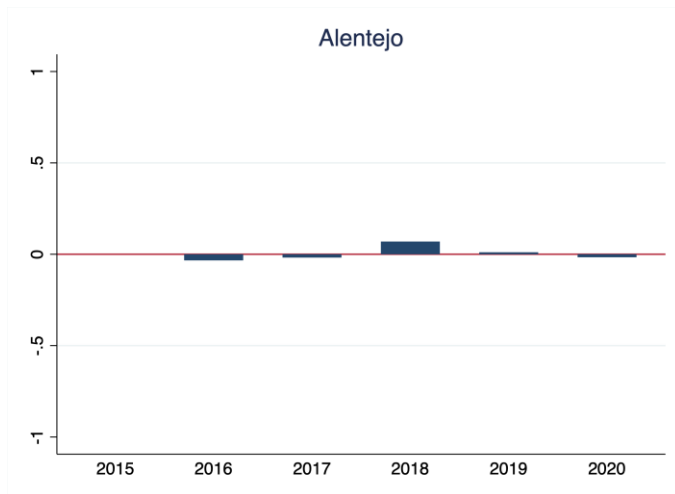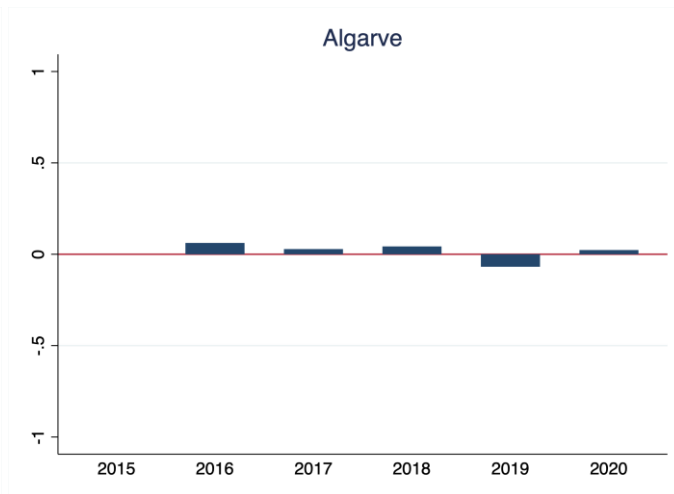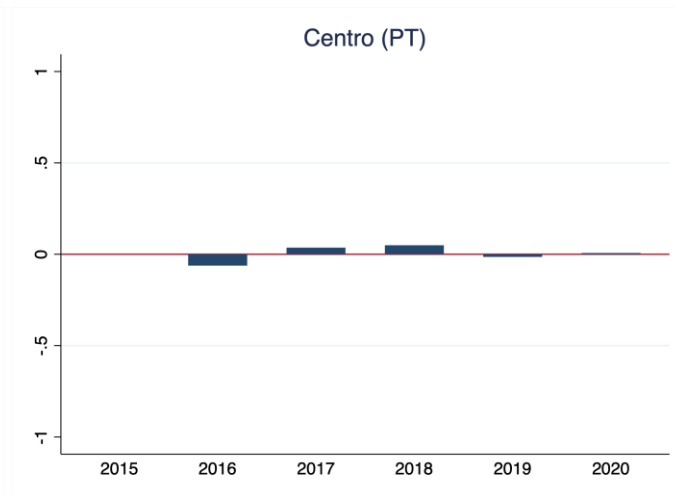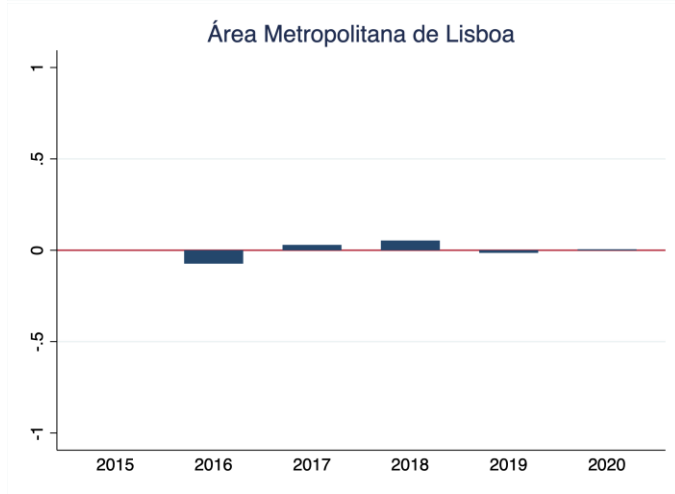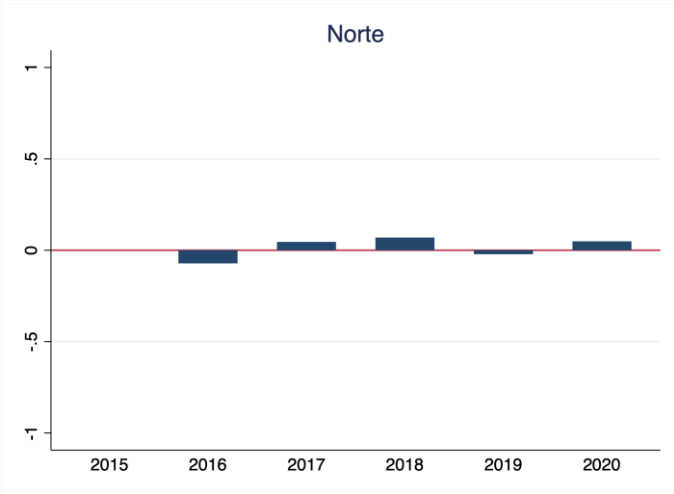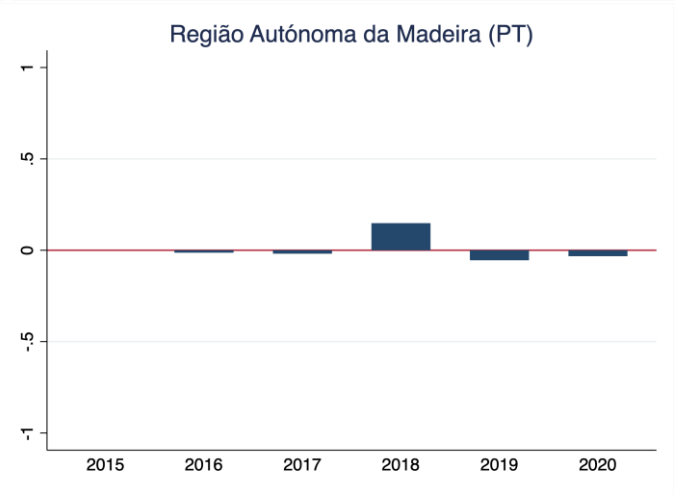

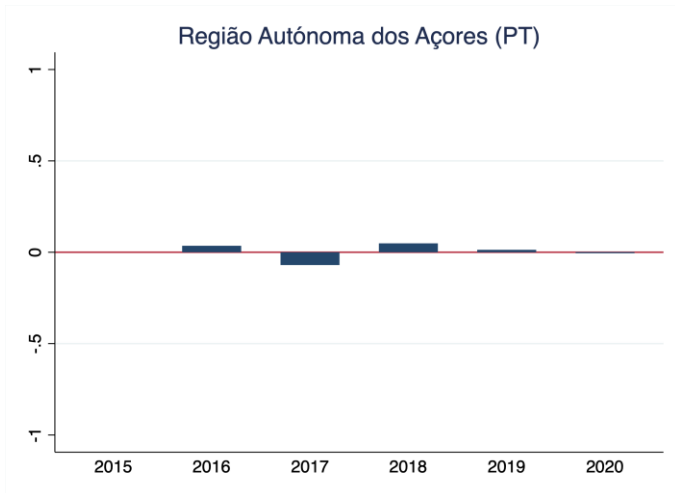

## SLOVAK REPUBLIC

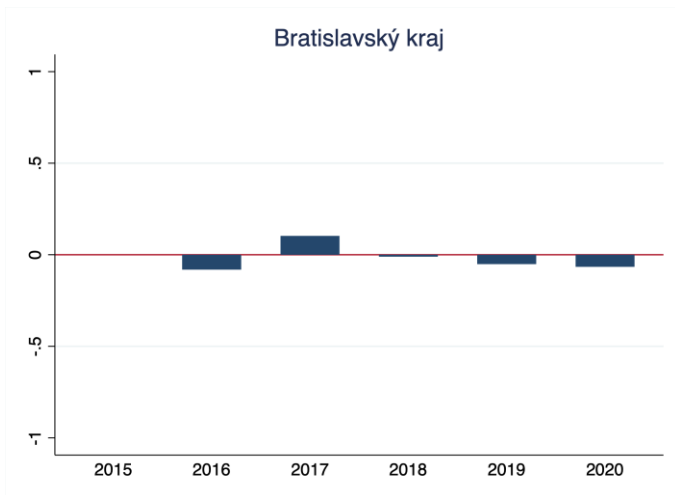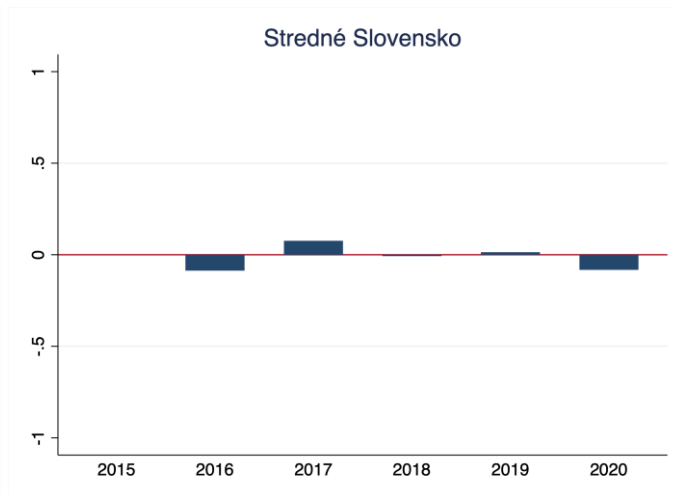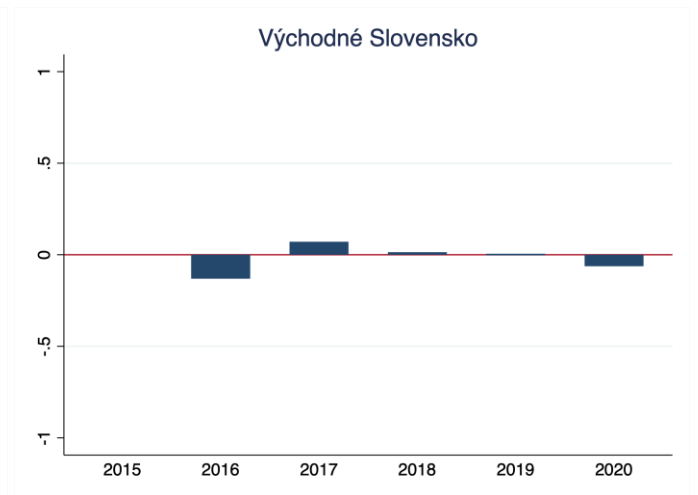

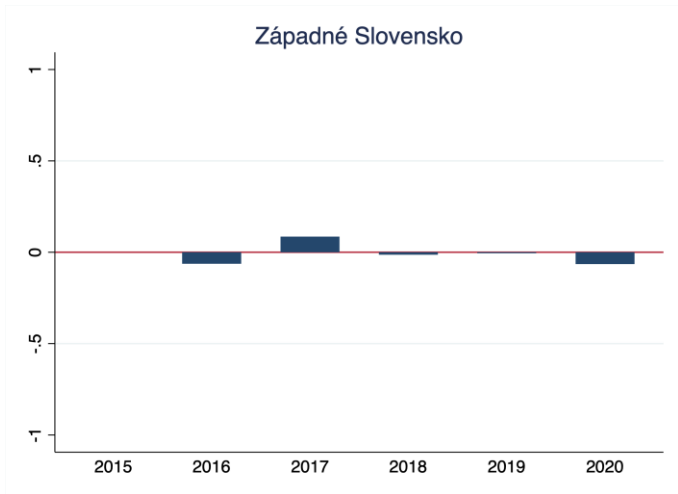

## SPAIN

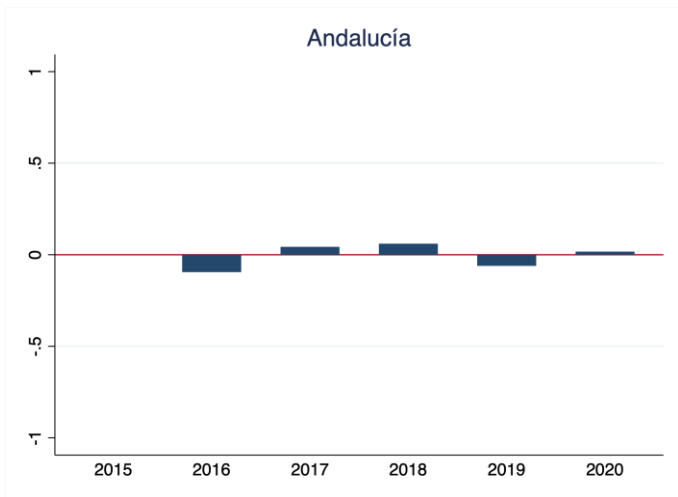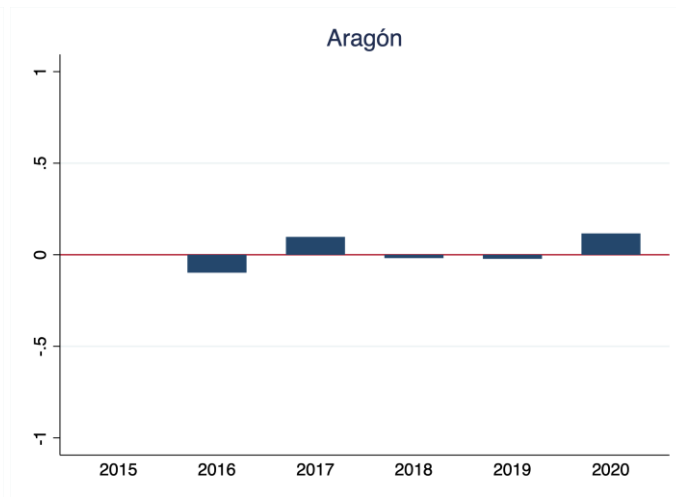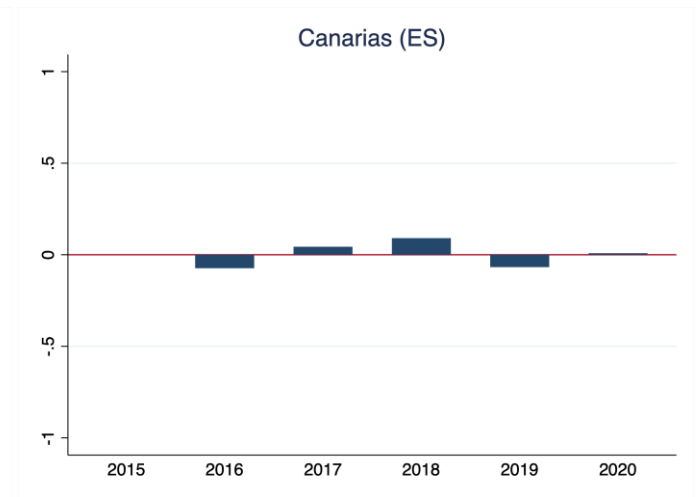

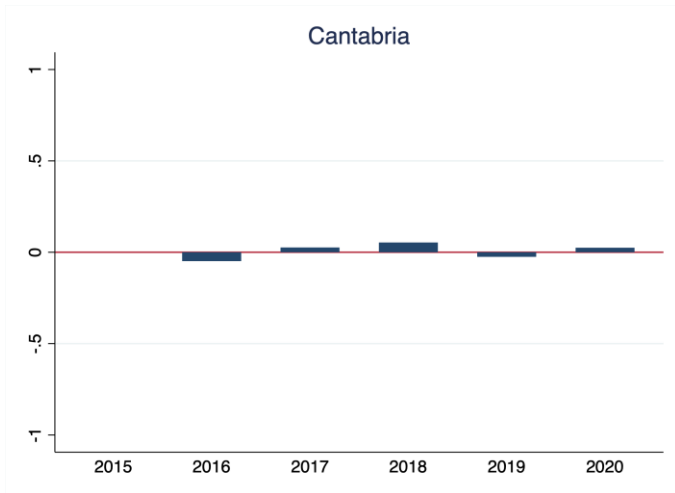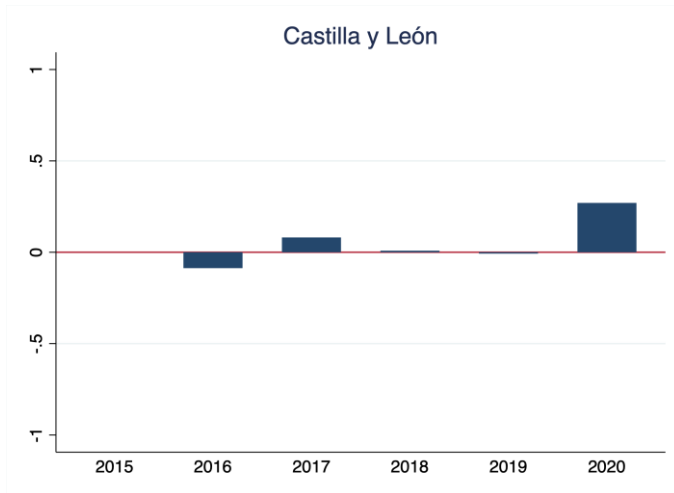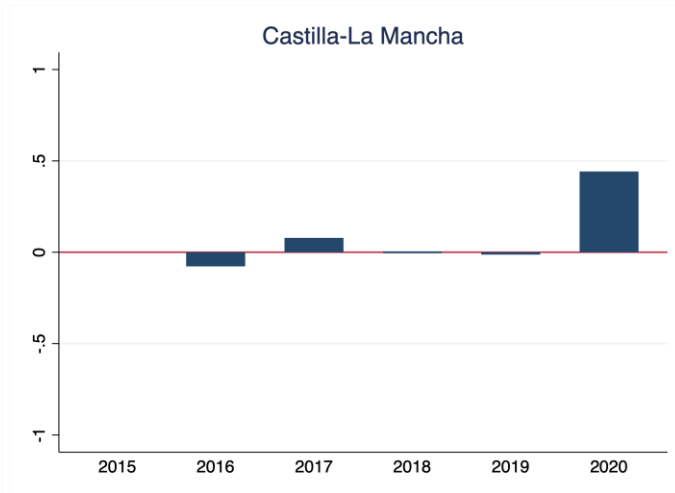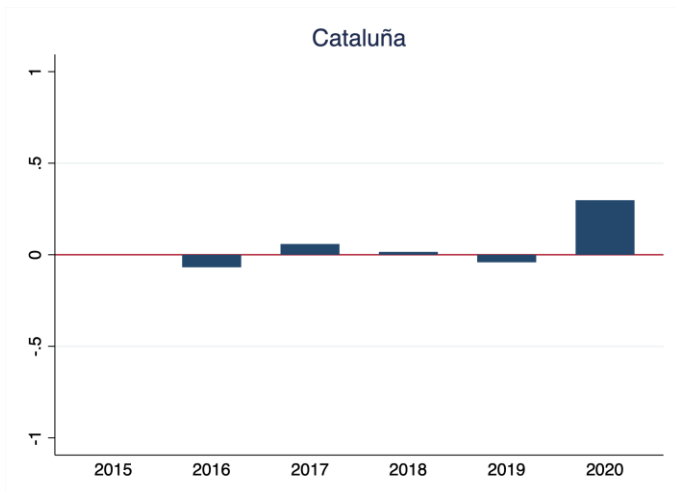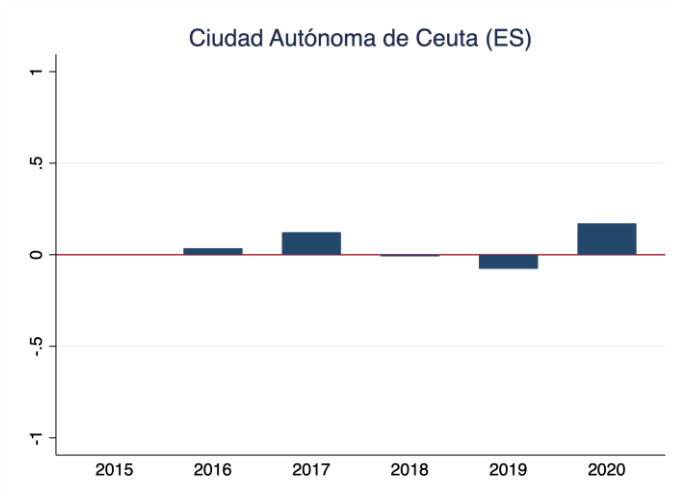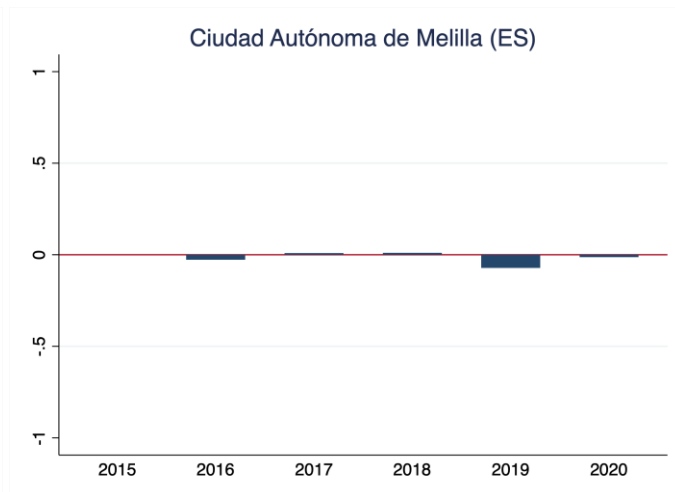

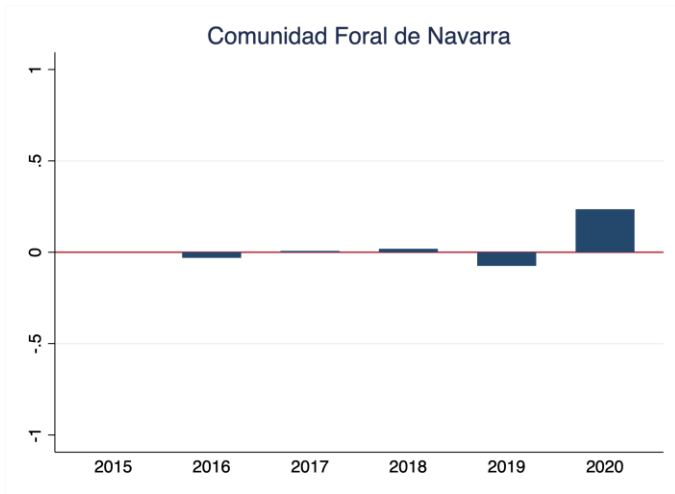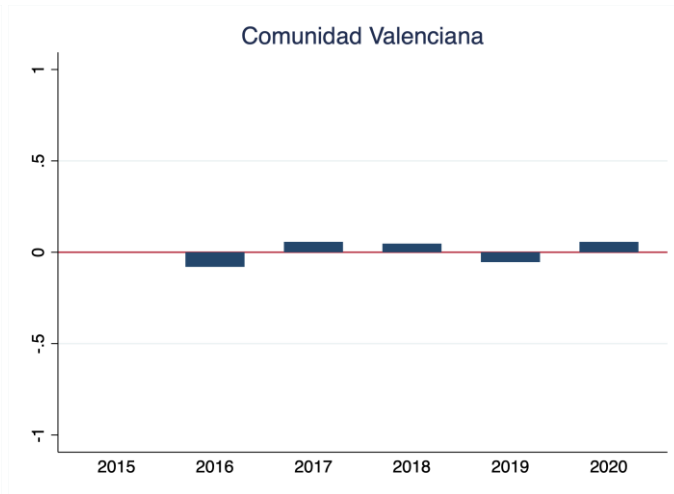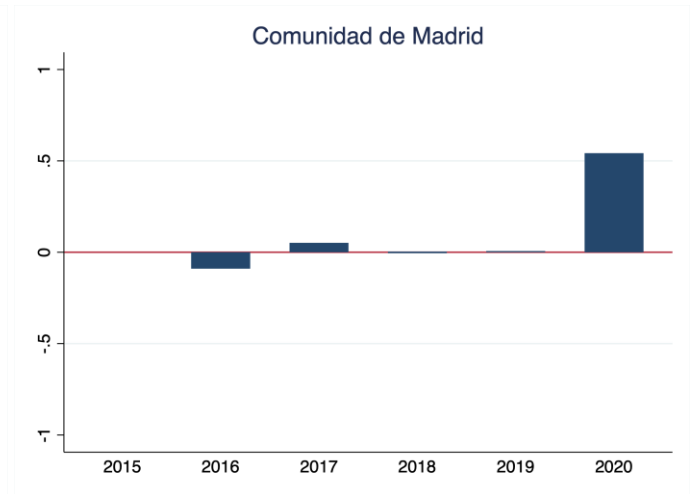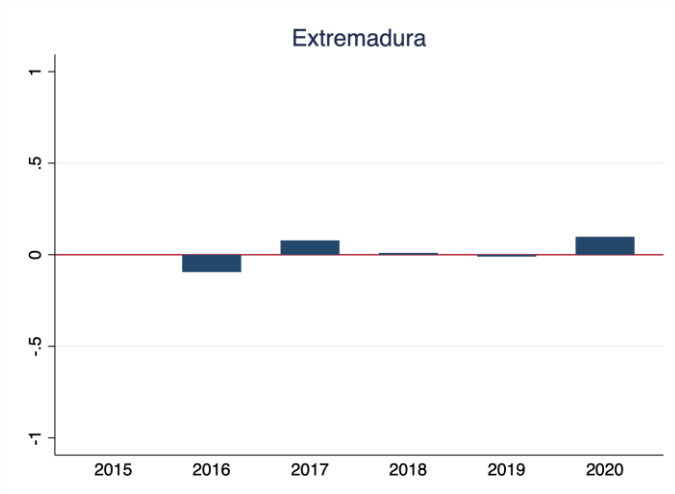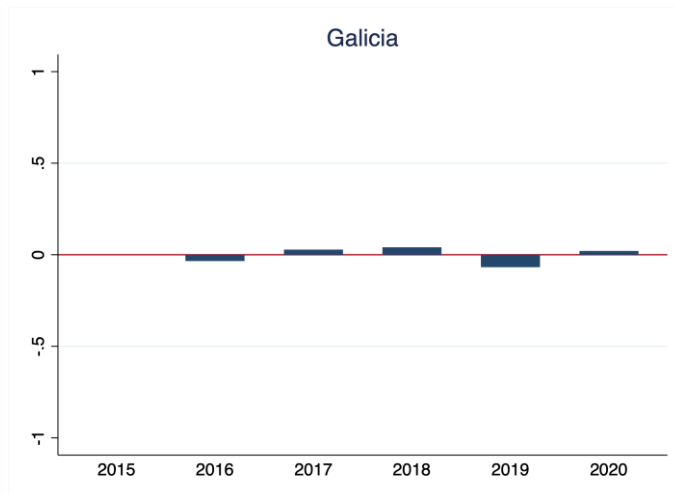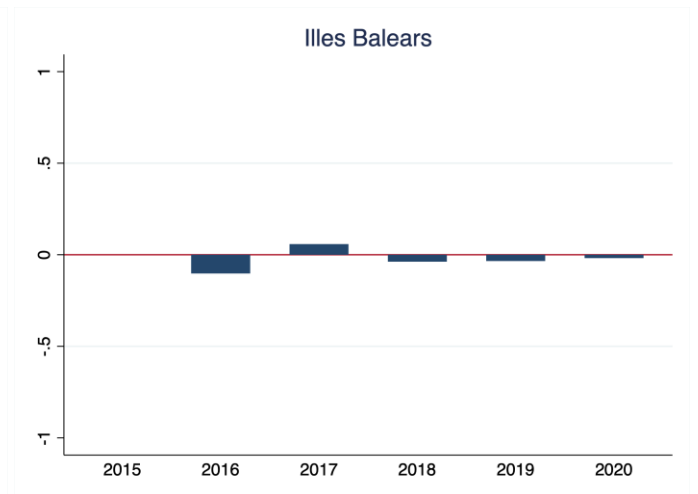

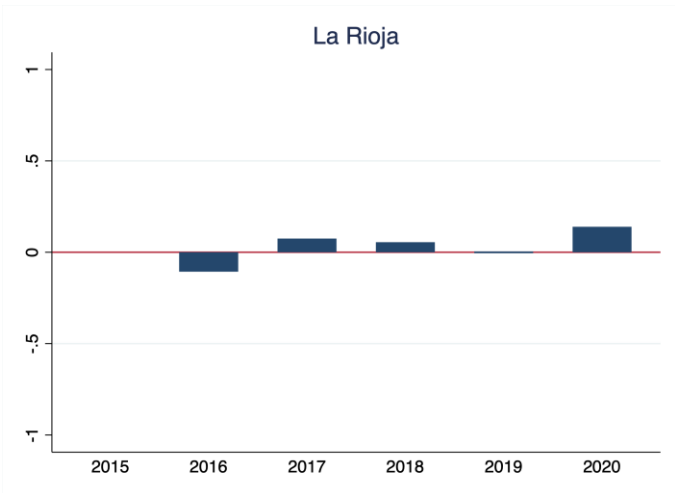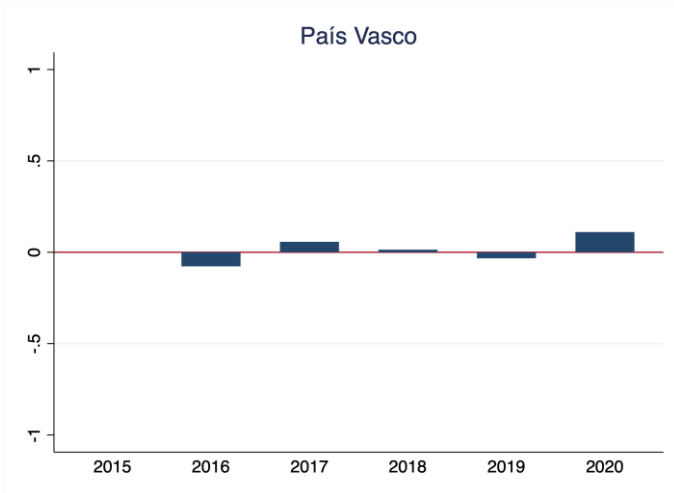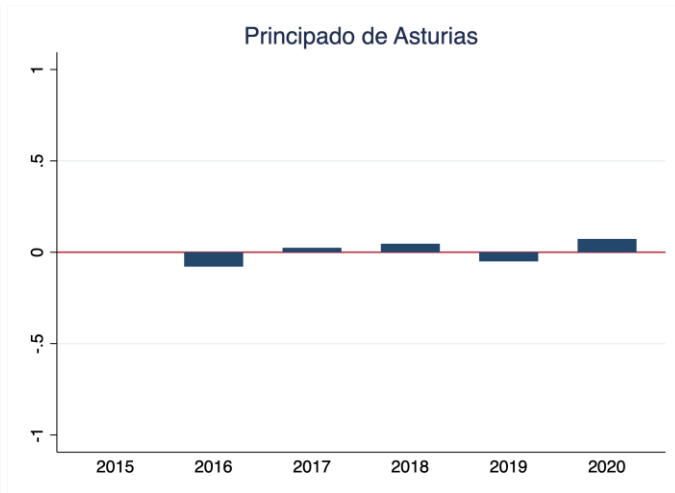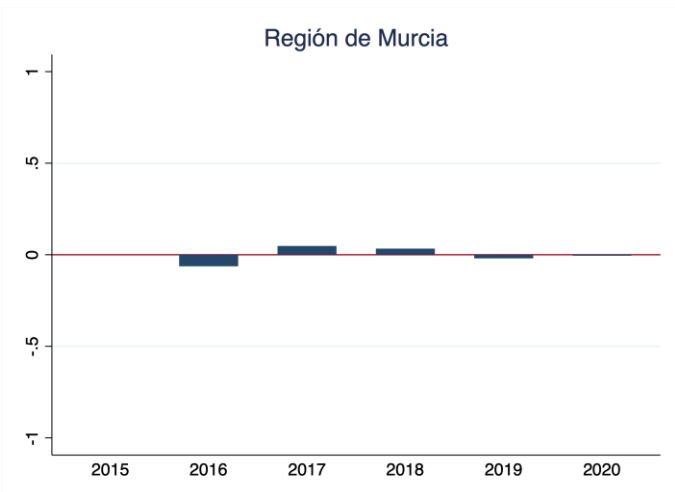

# SWEDEN

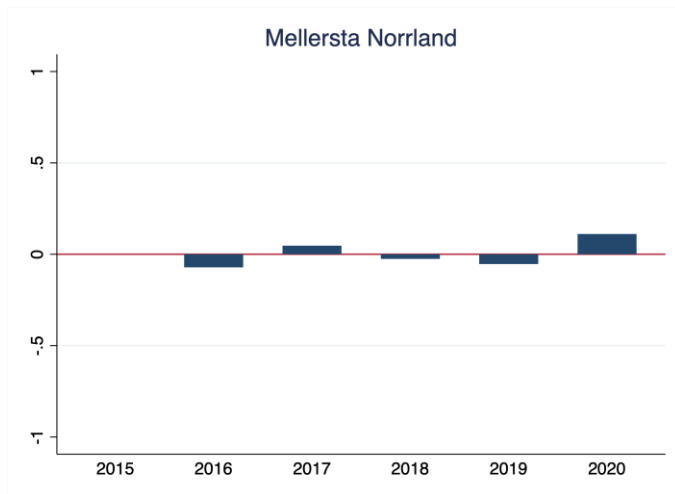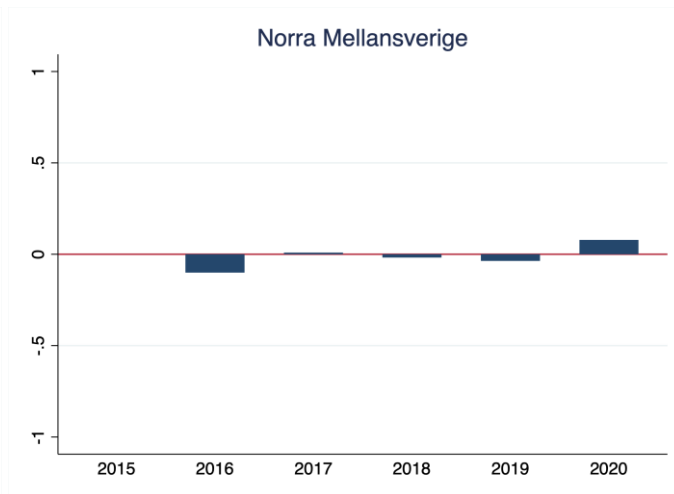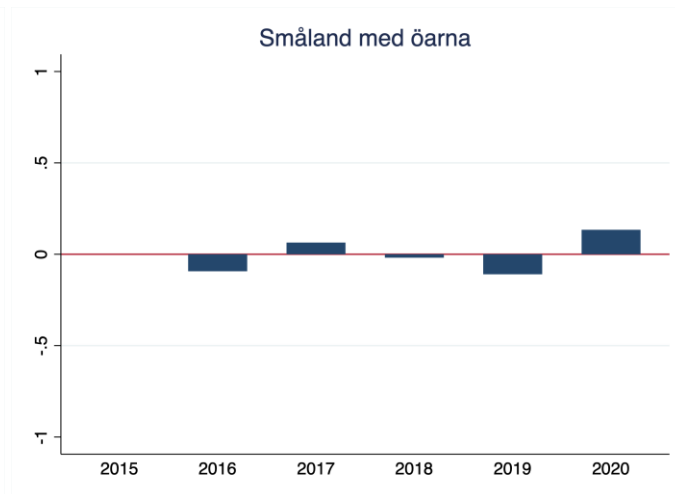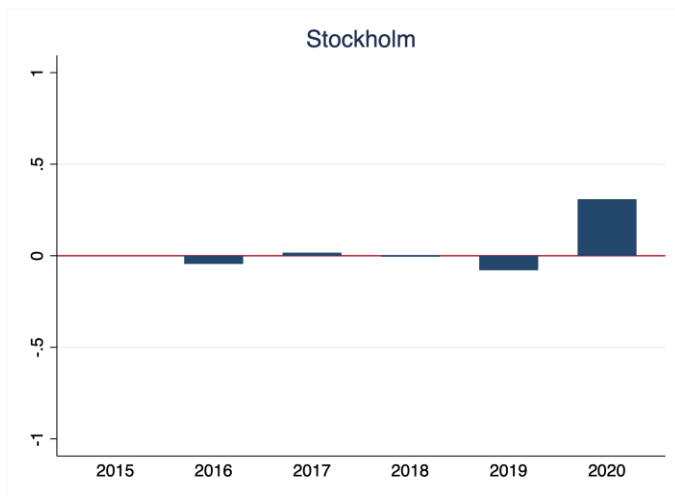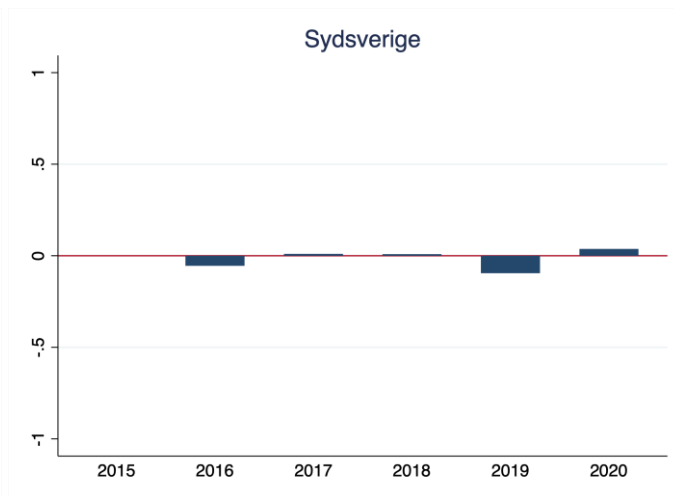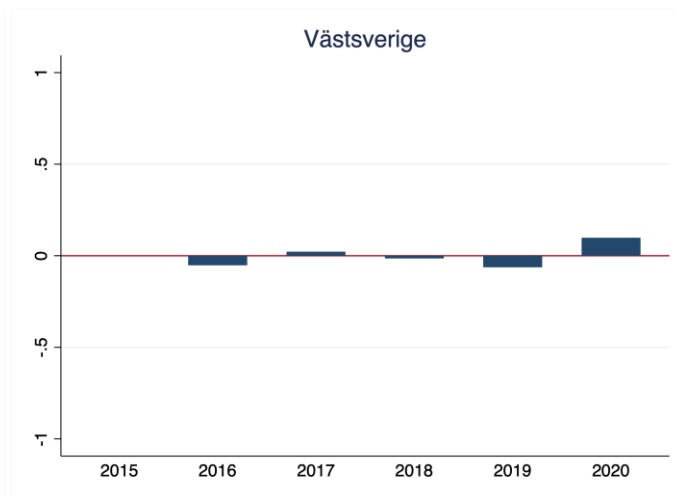



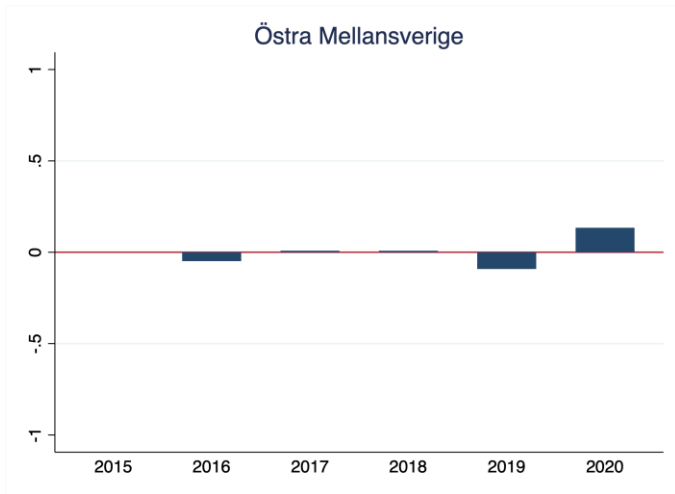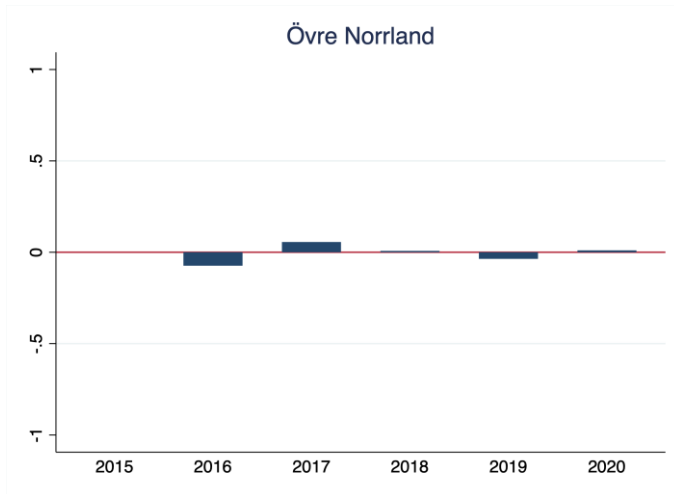

## SWITZERLAND

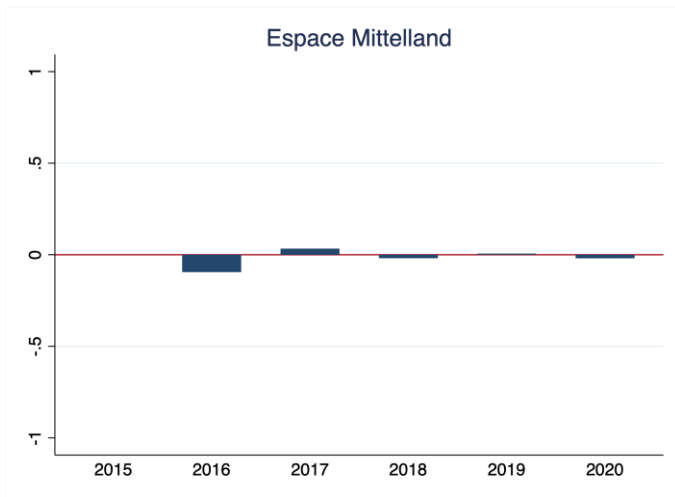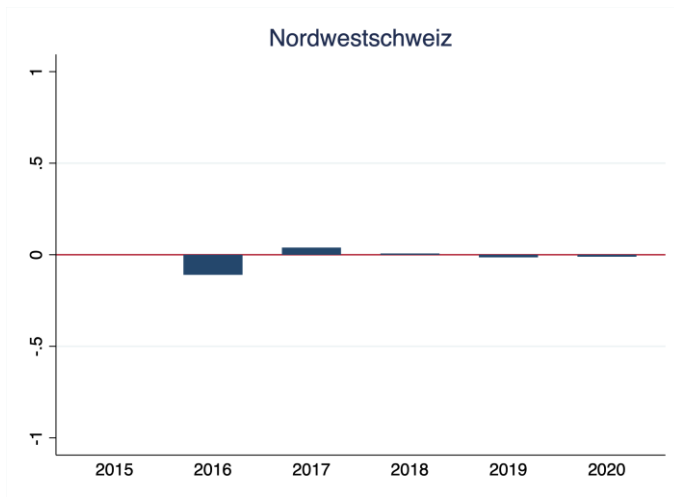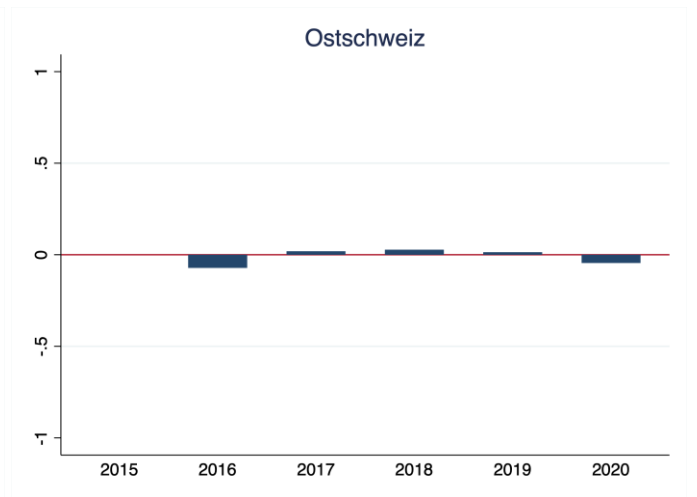

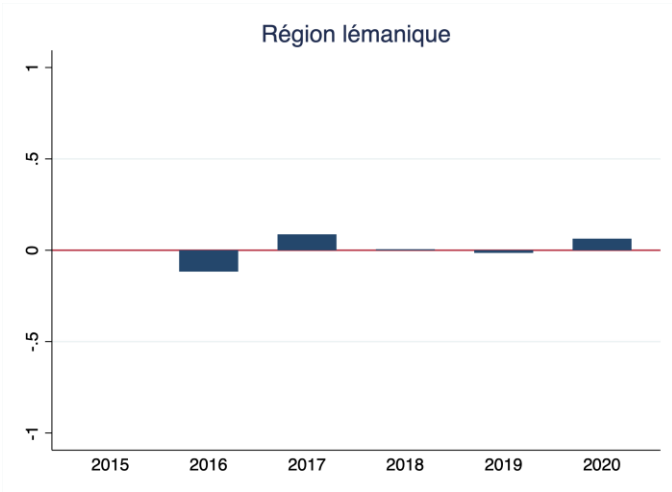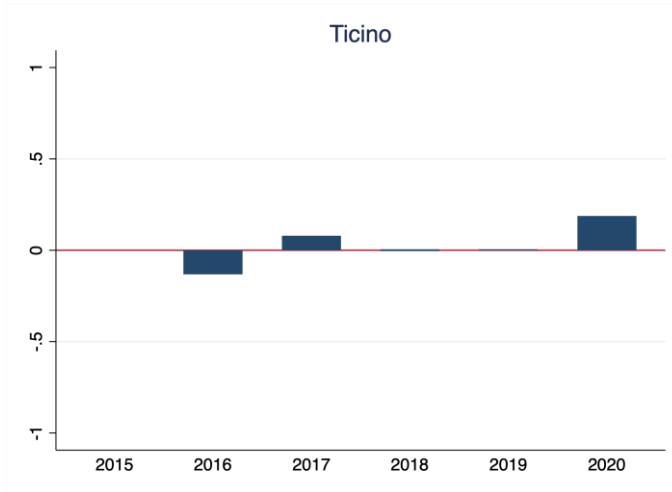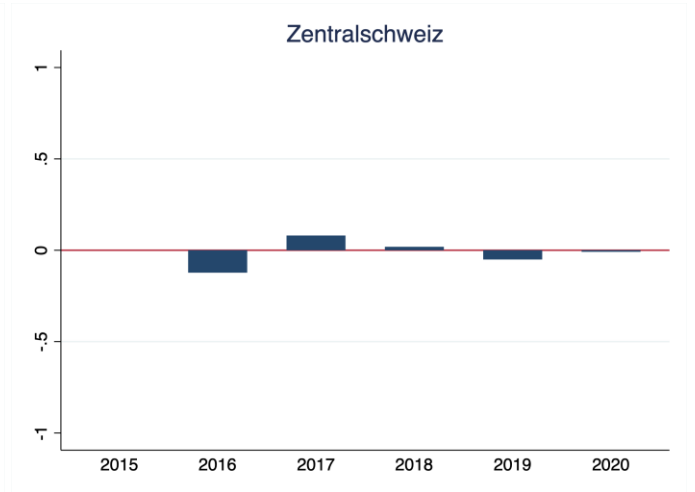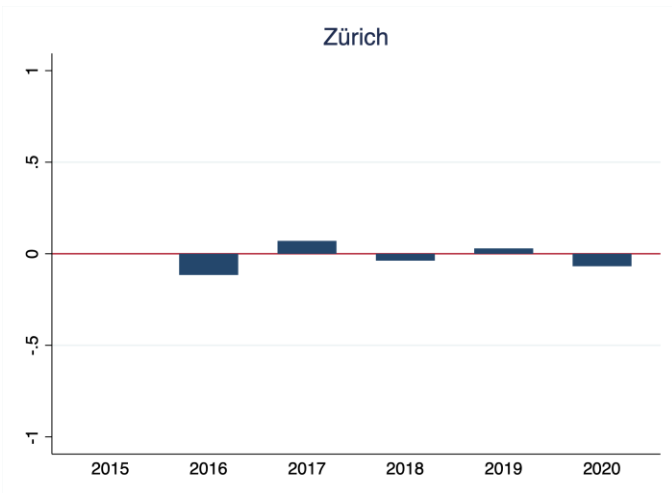

# UNITED KINGDOM

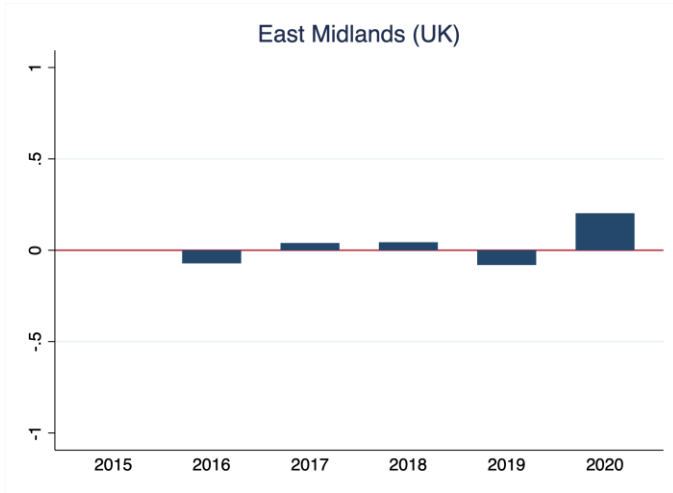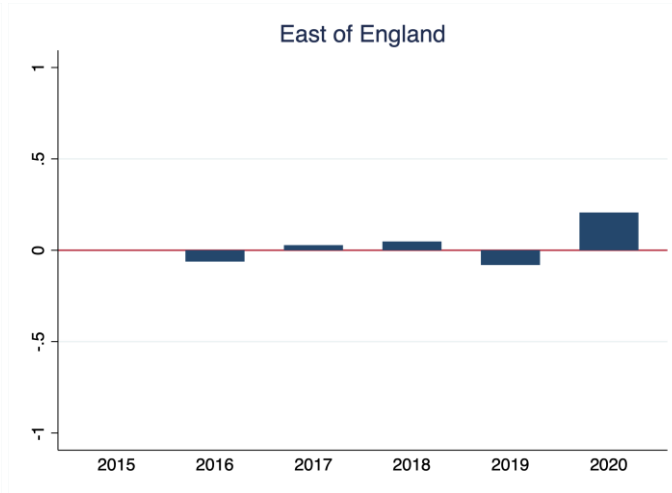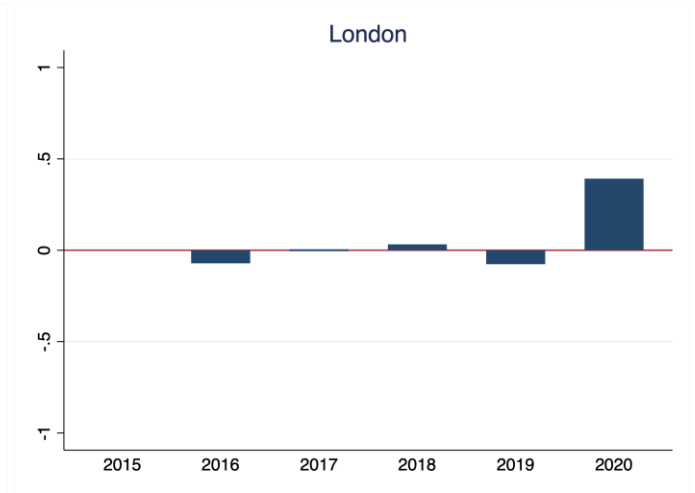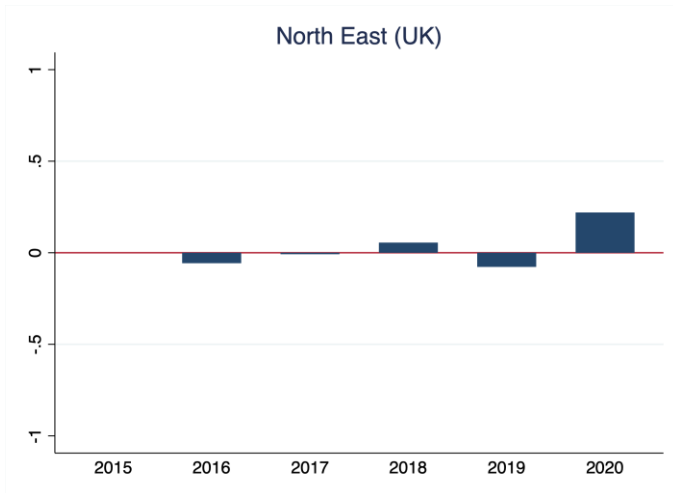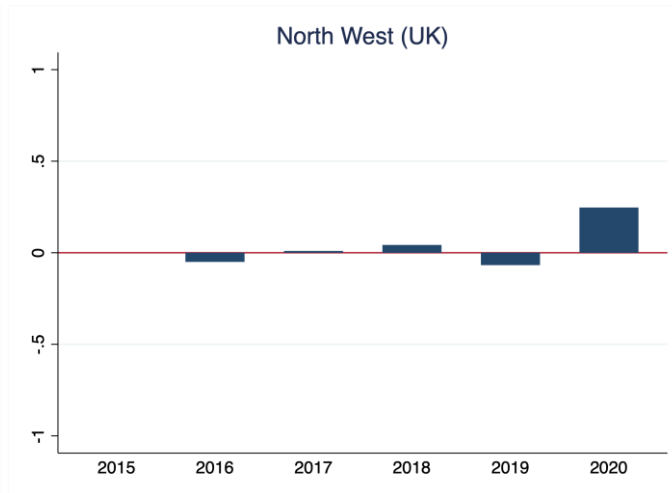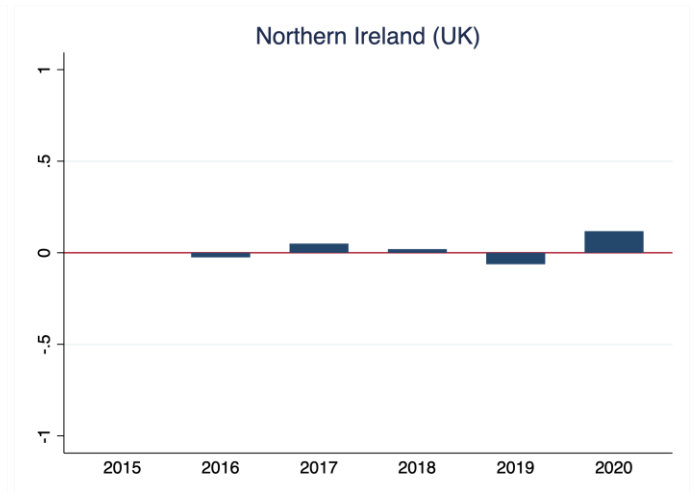

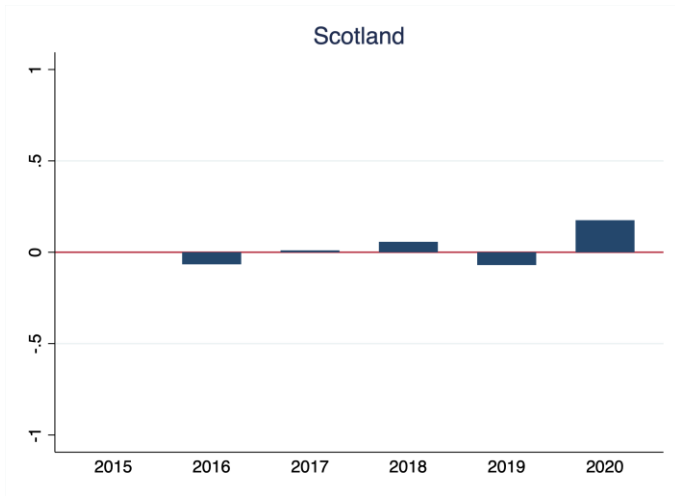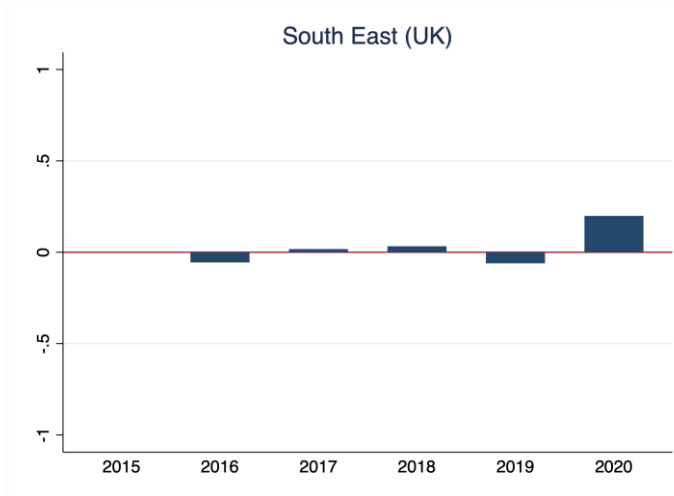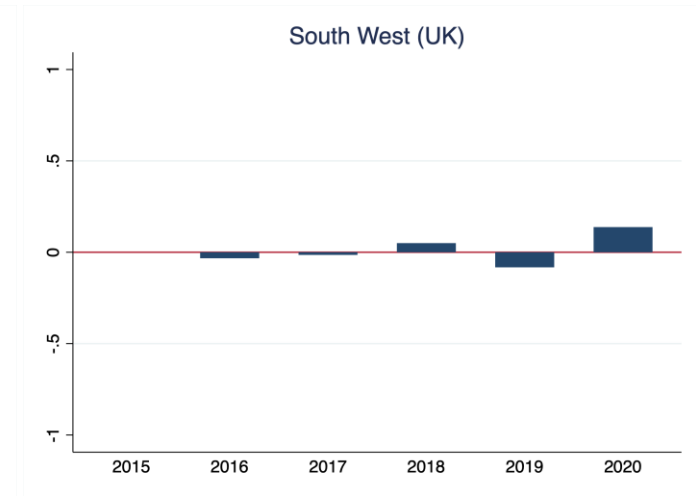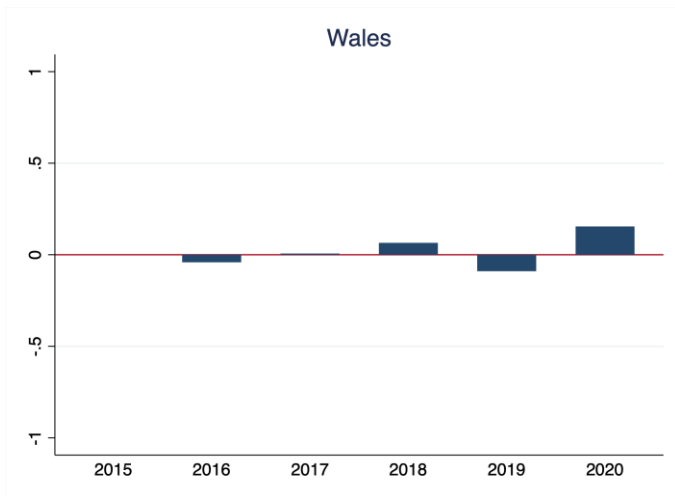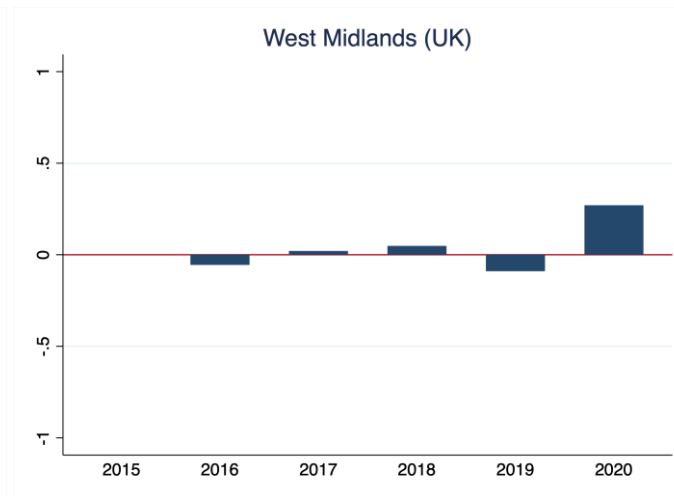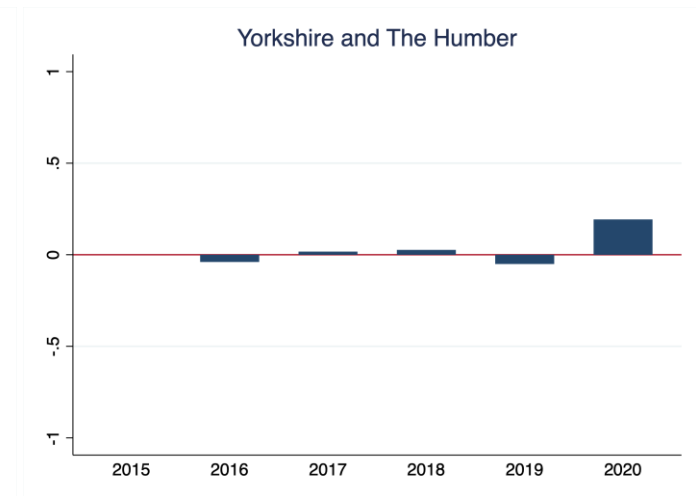

Supplement: JORS-61-728-s001.pdf [file JORS-61-728-s001.pdf]
